# Supplementary material
Source: publisher figshare collection journal article supplement (https://karger.figshare.com/articles/dataset/_/5121730)

# Evolution of patchily distributed proteins shared between eukaryotes and prokaryotes: *Dictyostelium* as a case study.

Jan O. Andersson

## Supplementary Figure 1

Maximum likelihood trees of 48 patchily distributed protein families identified with four or more taxa. Color coding and methods as in Figure 2.

**Figure S1AA**

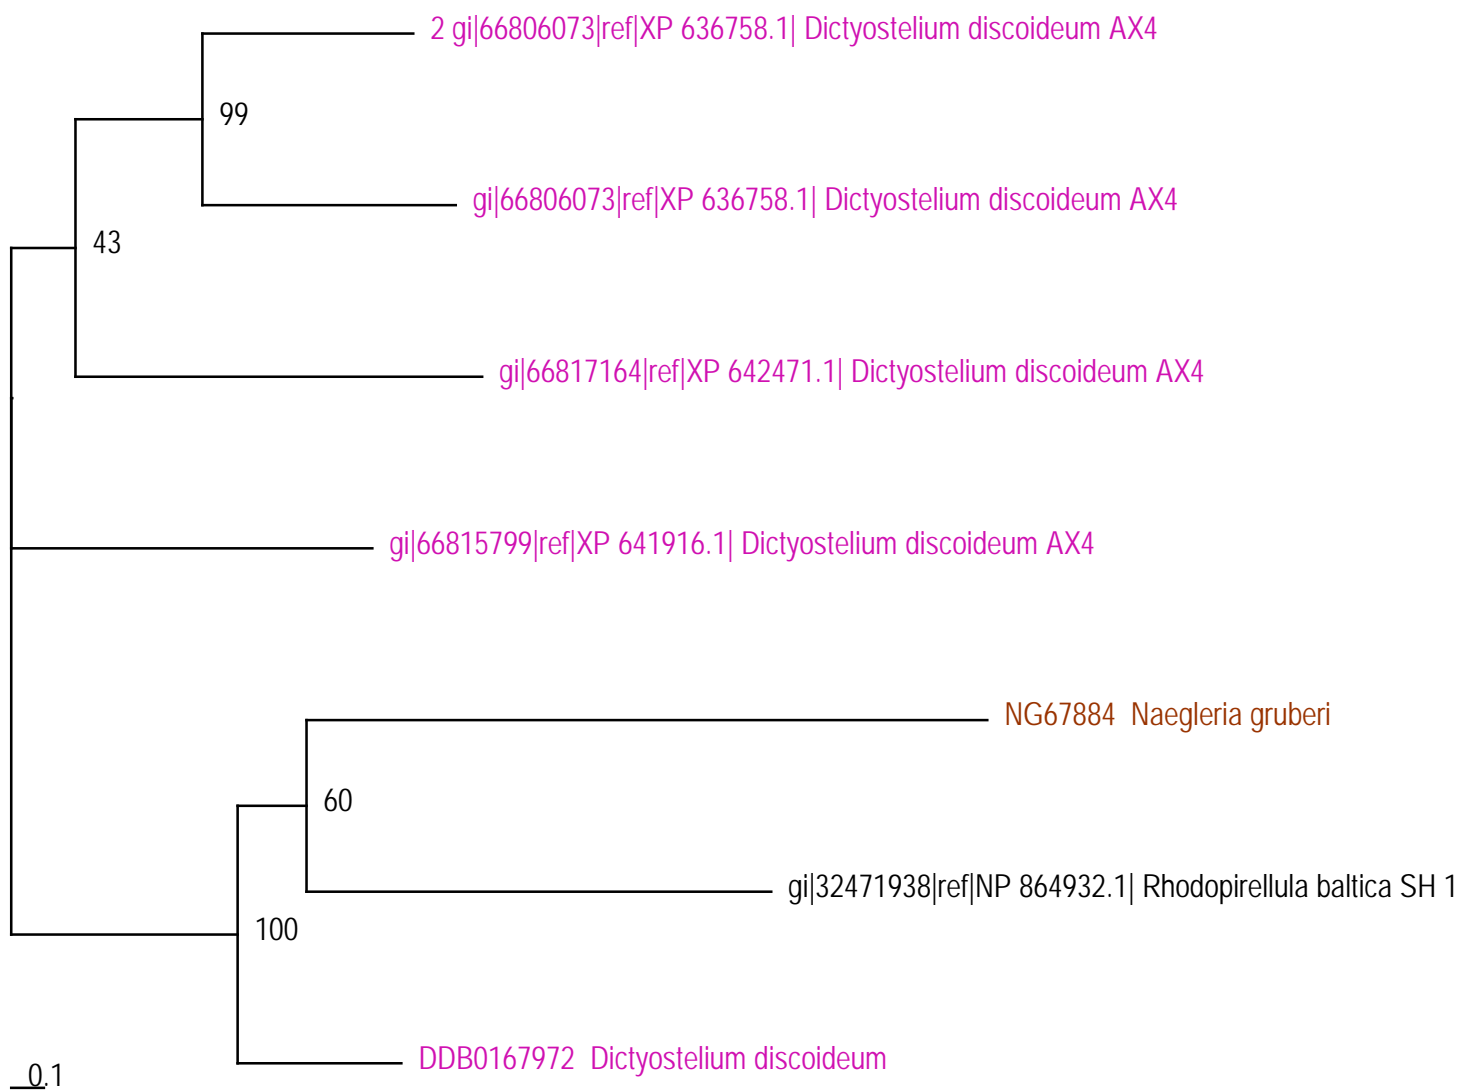

Figure S1AB

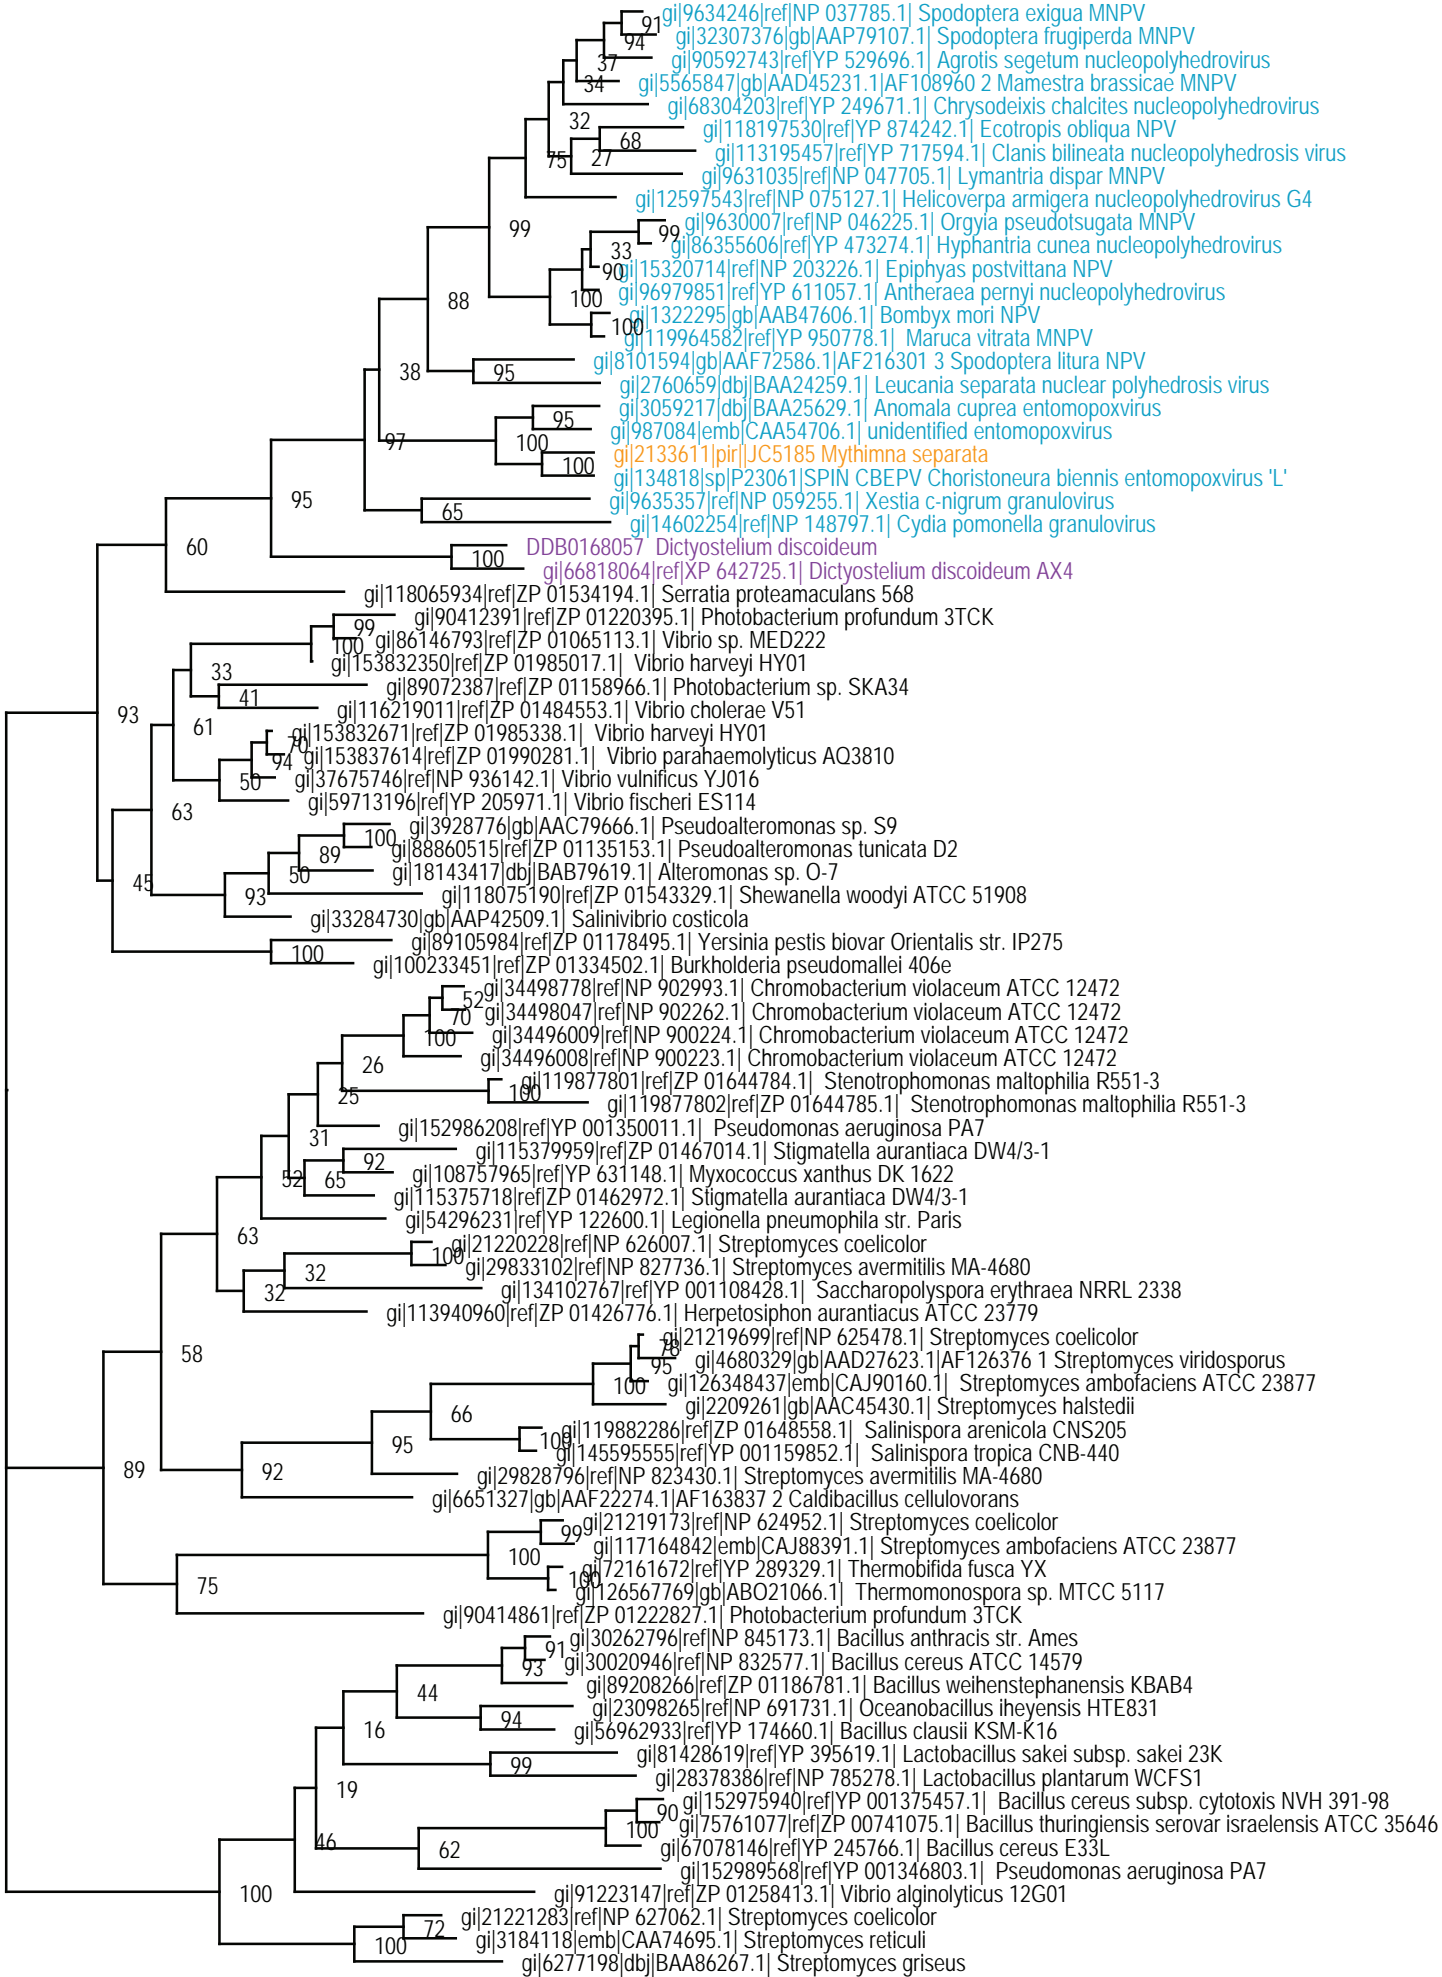

Figure S1AC

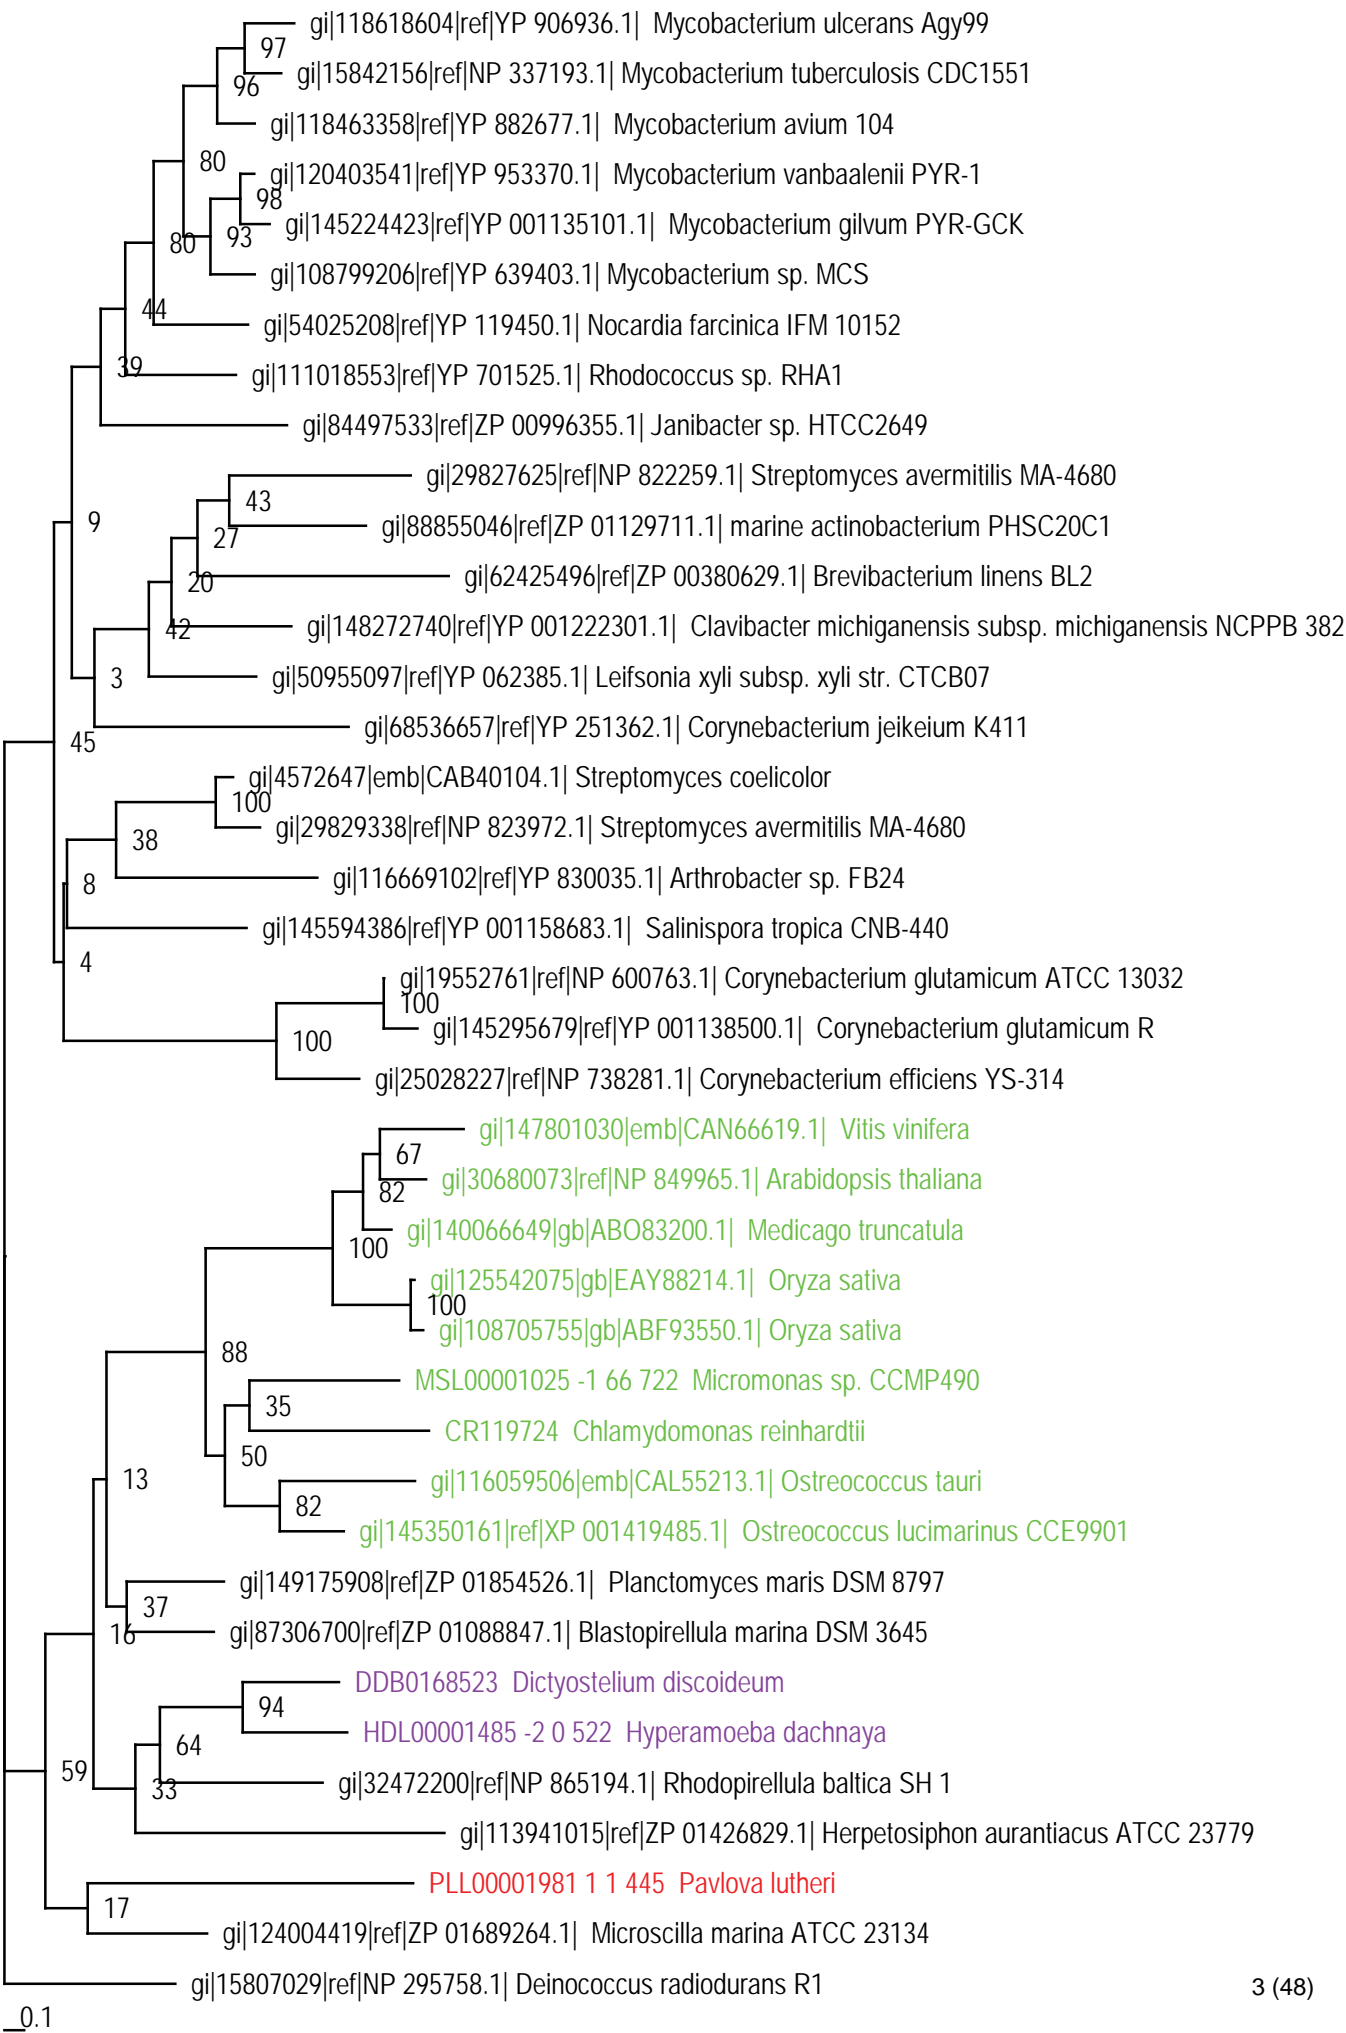

Figure S1AD

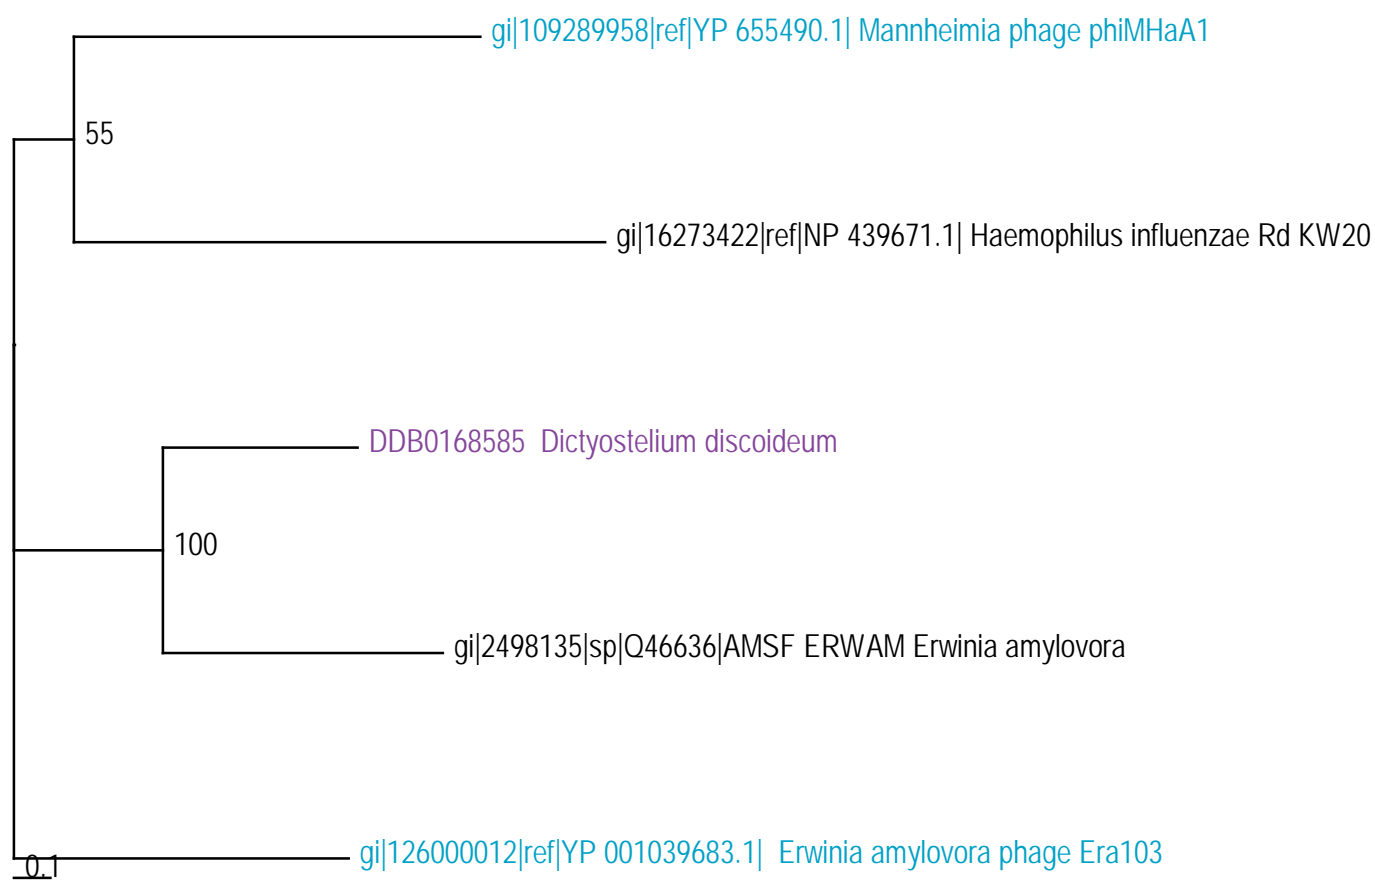

Figure S1AE

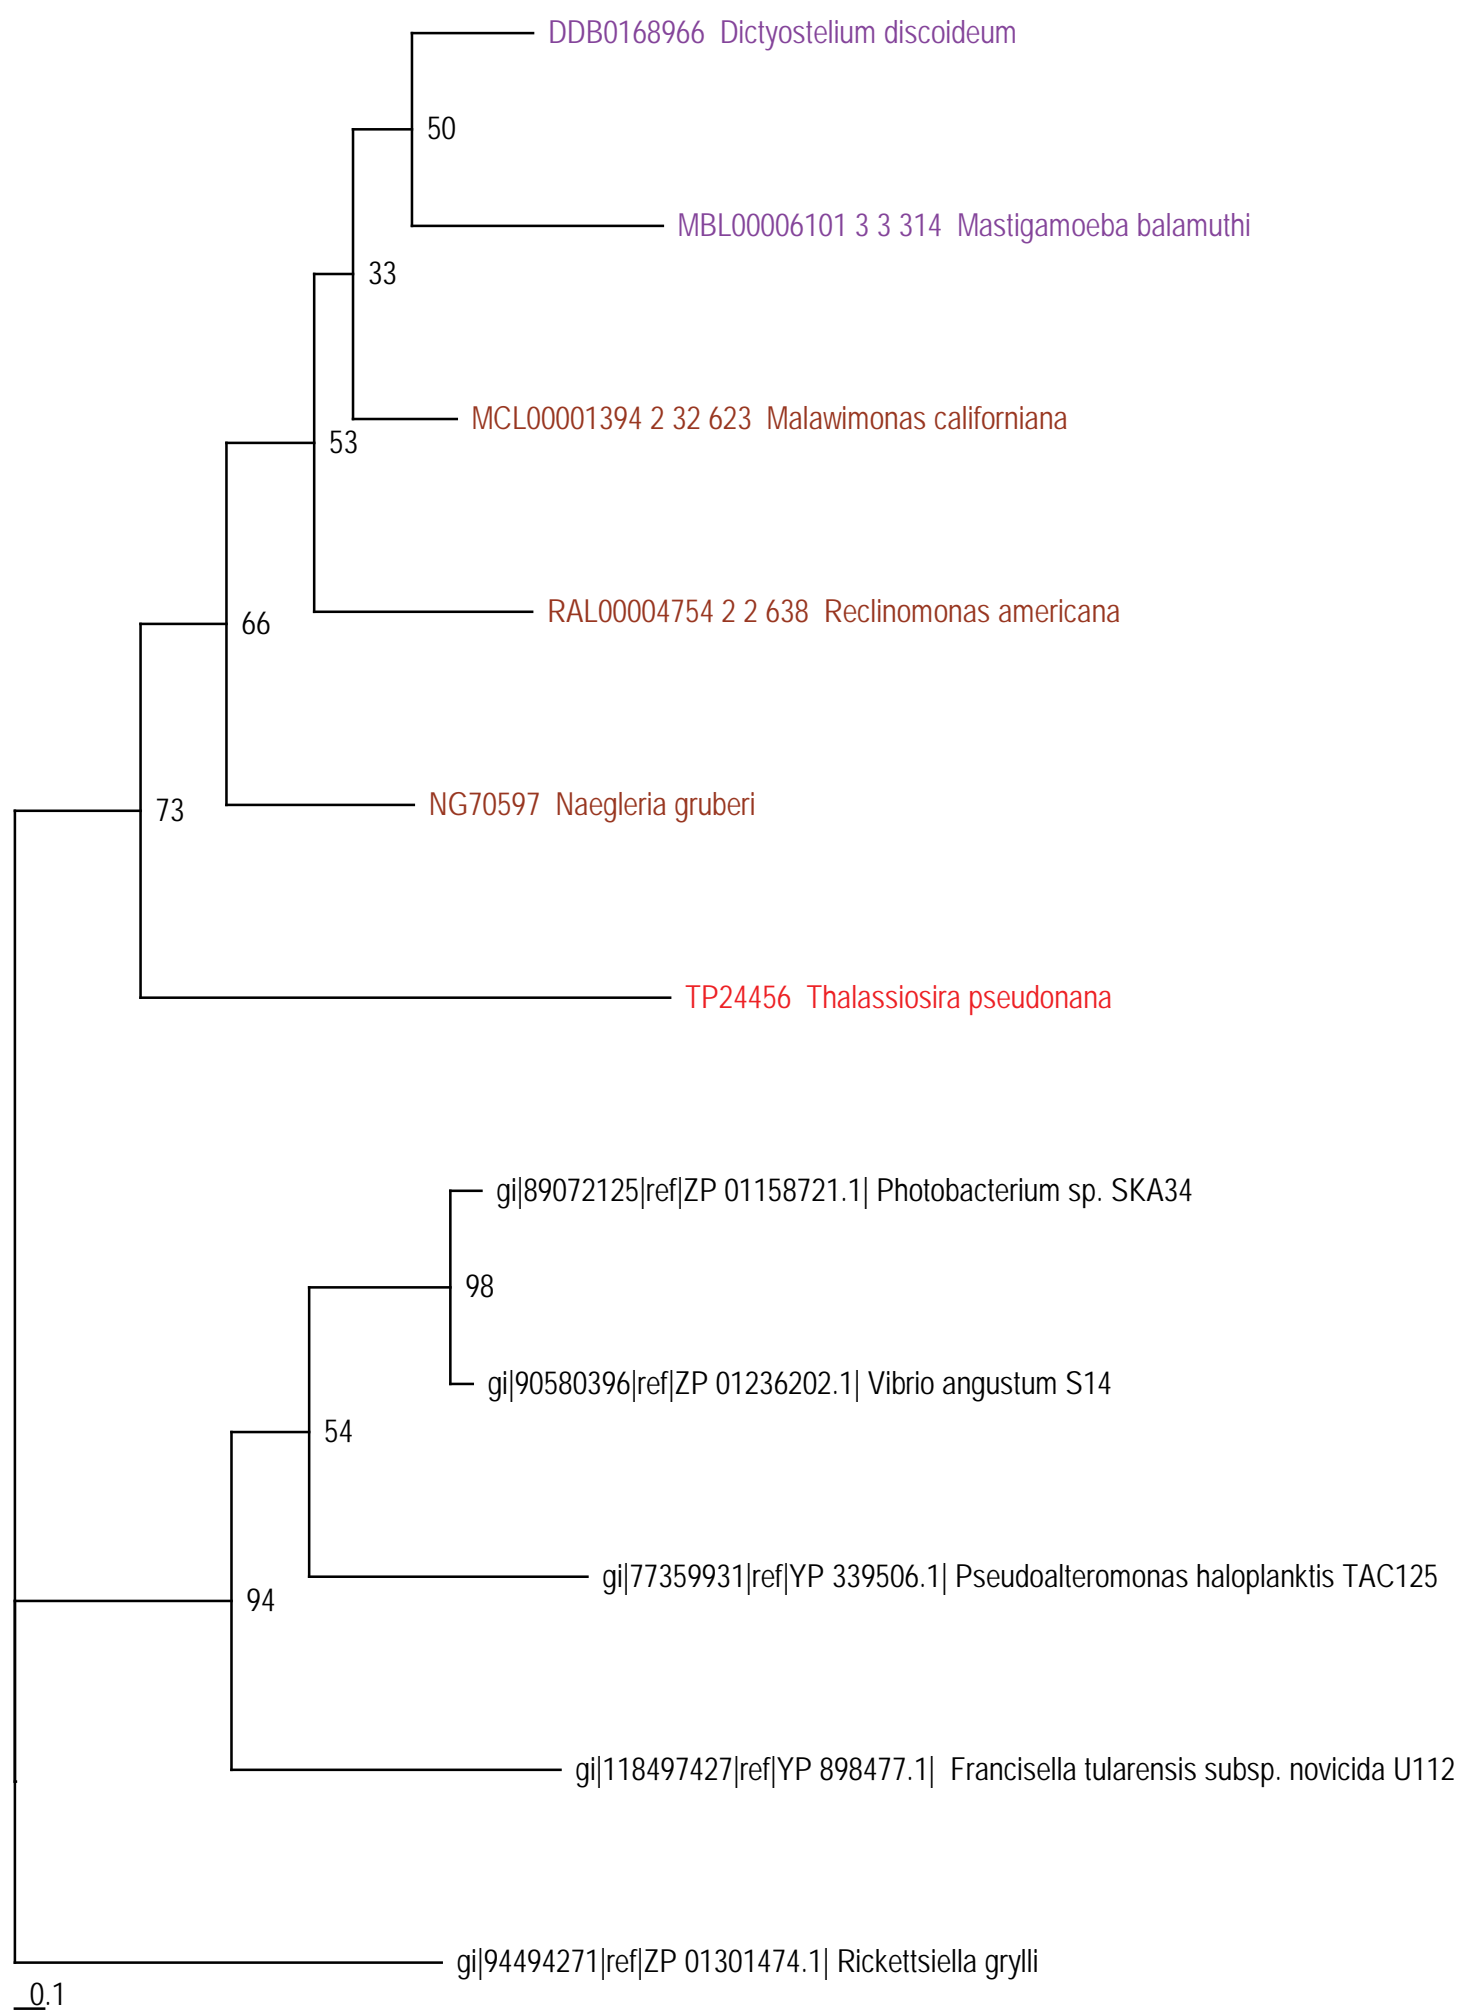

Figure S1AF

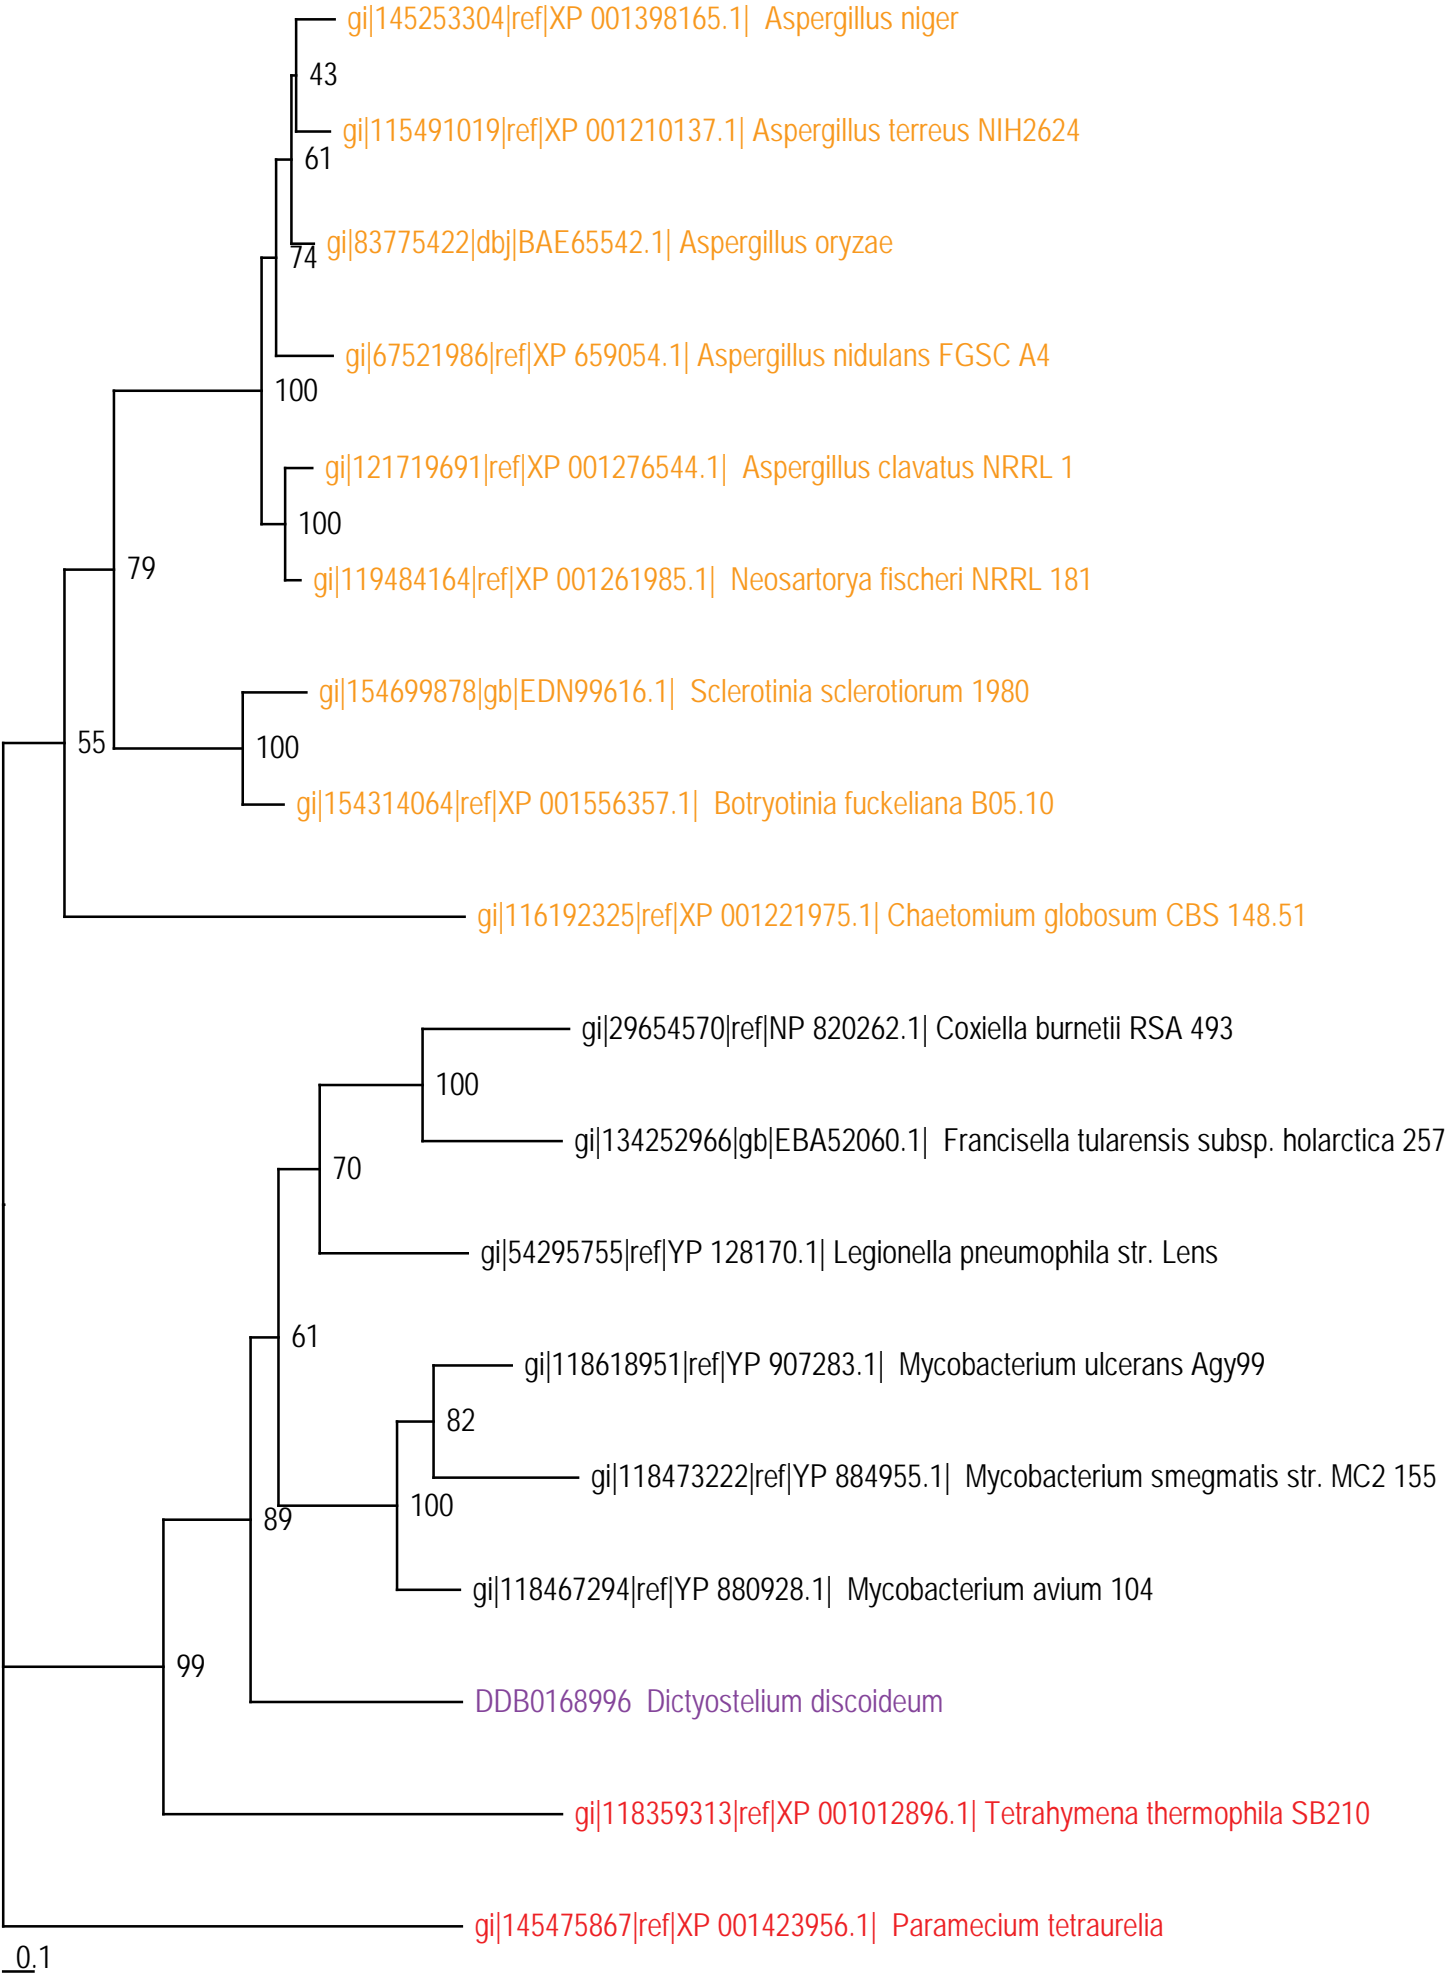

**Figure S1AG**

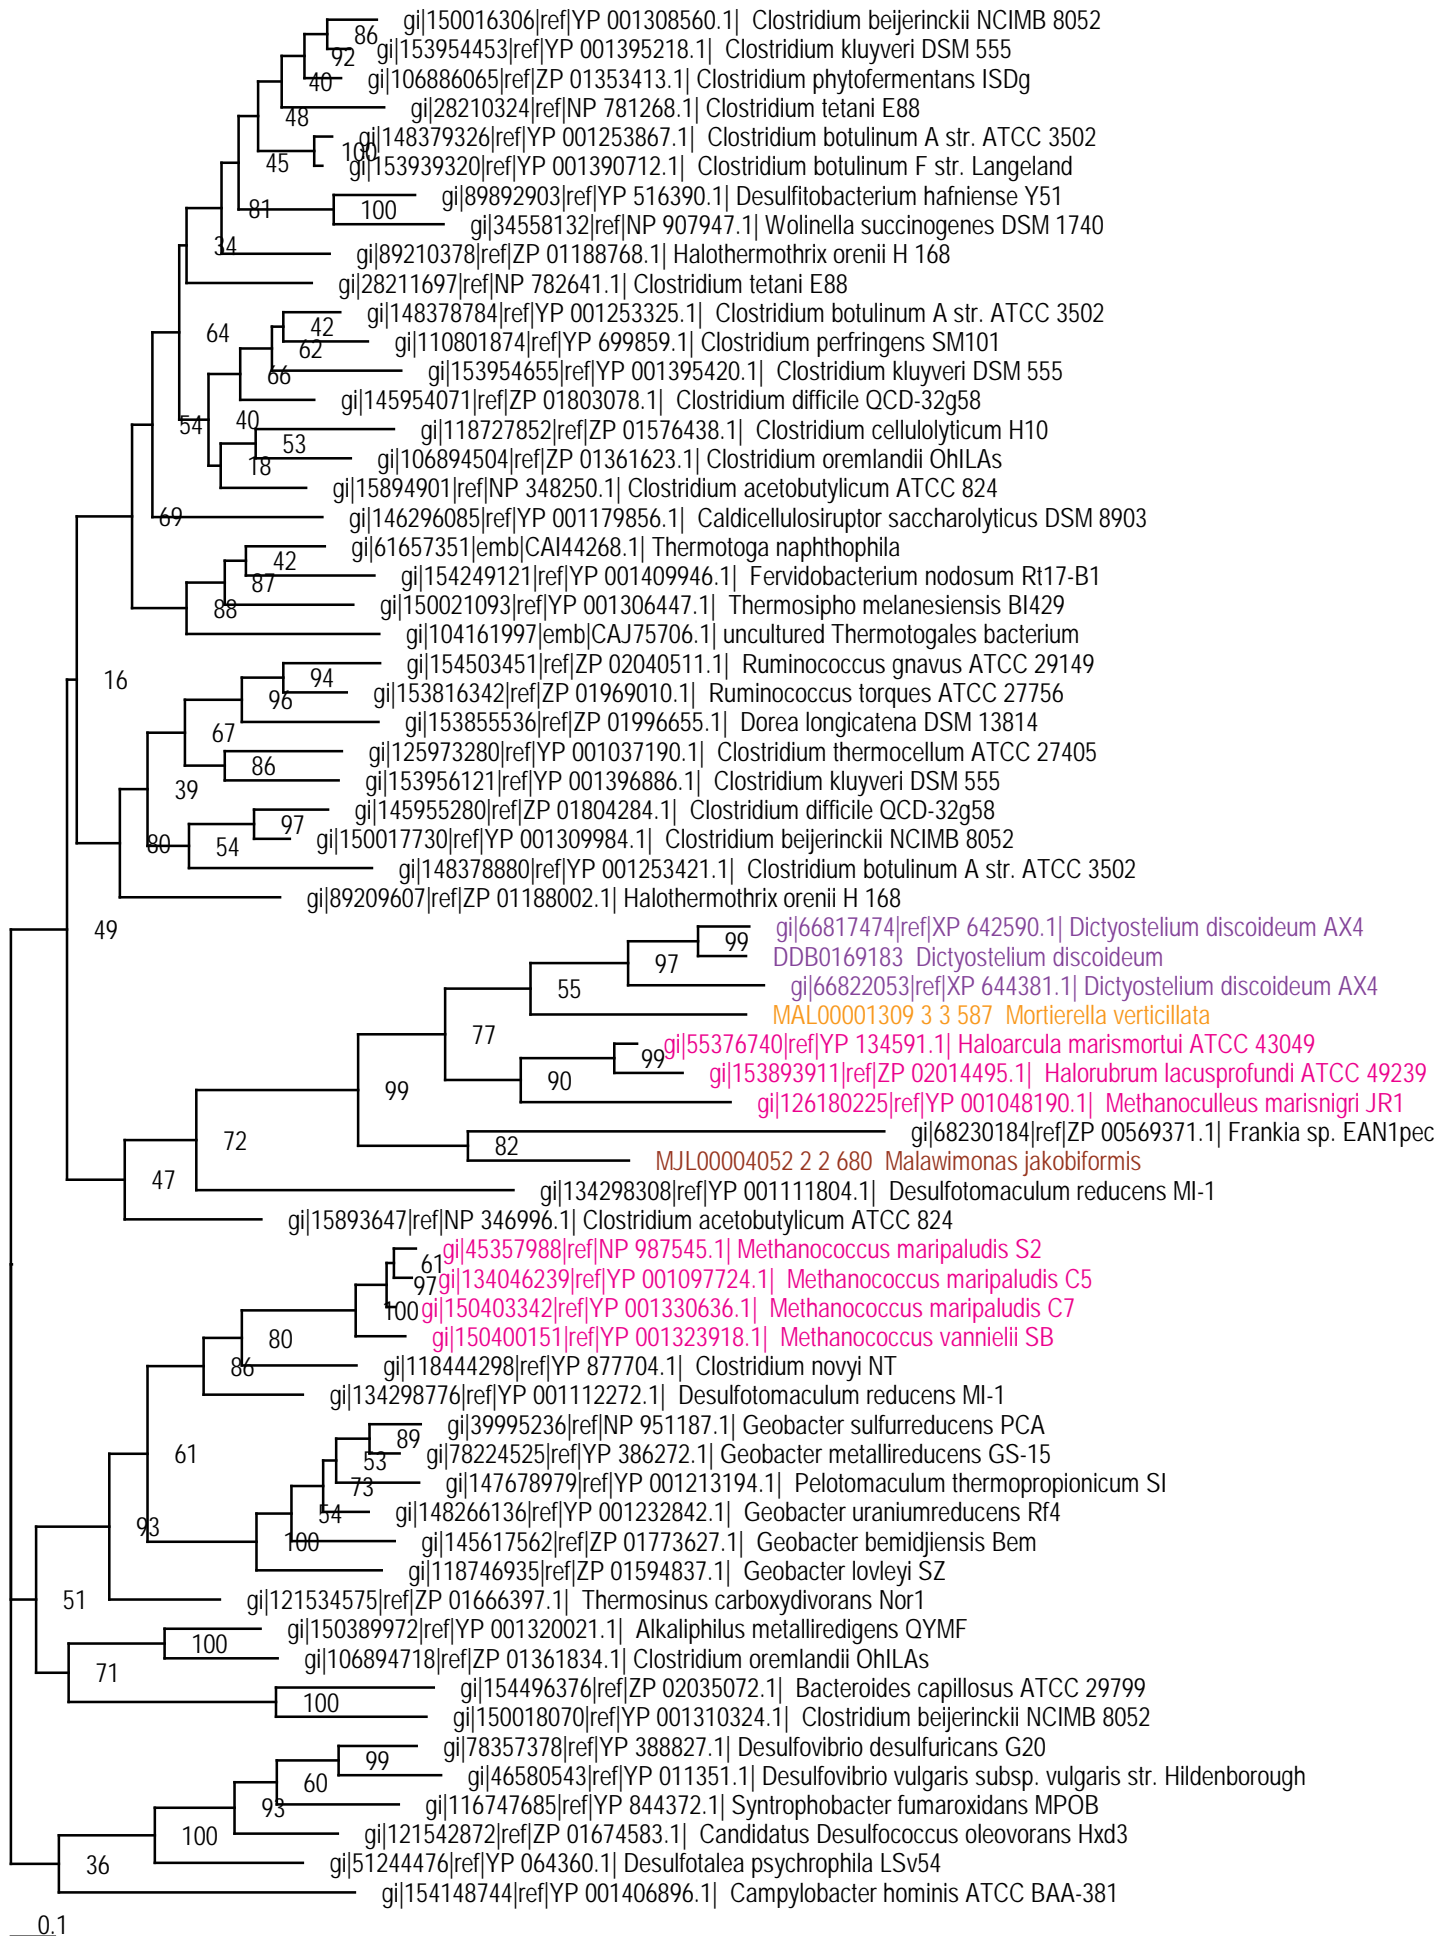

Figure S1AH

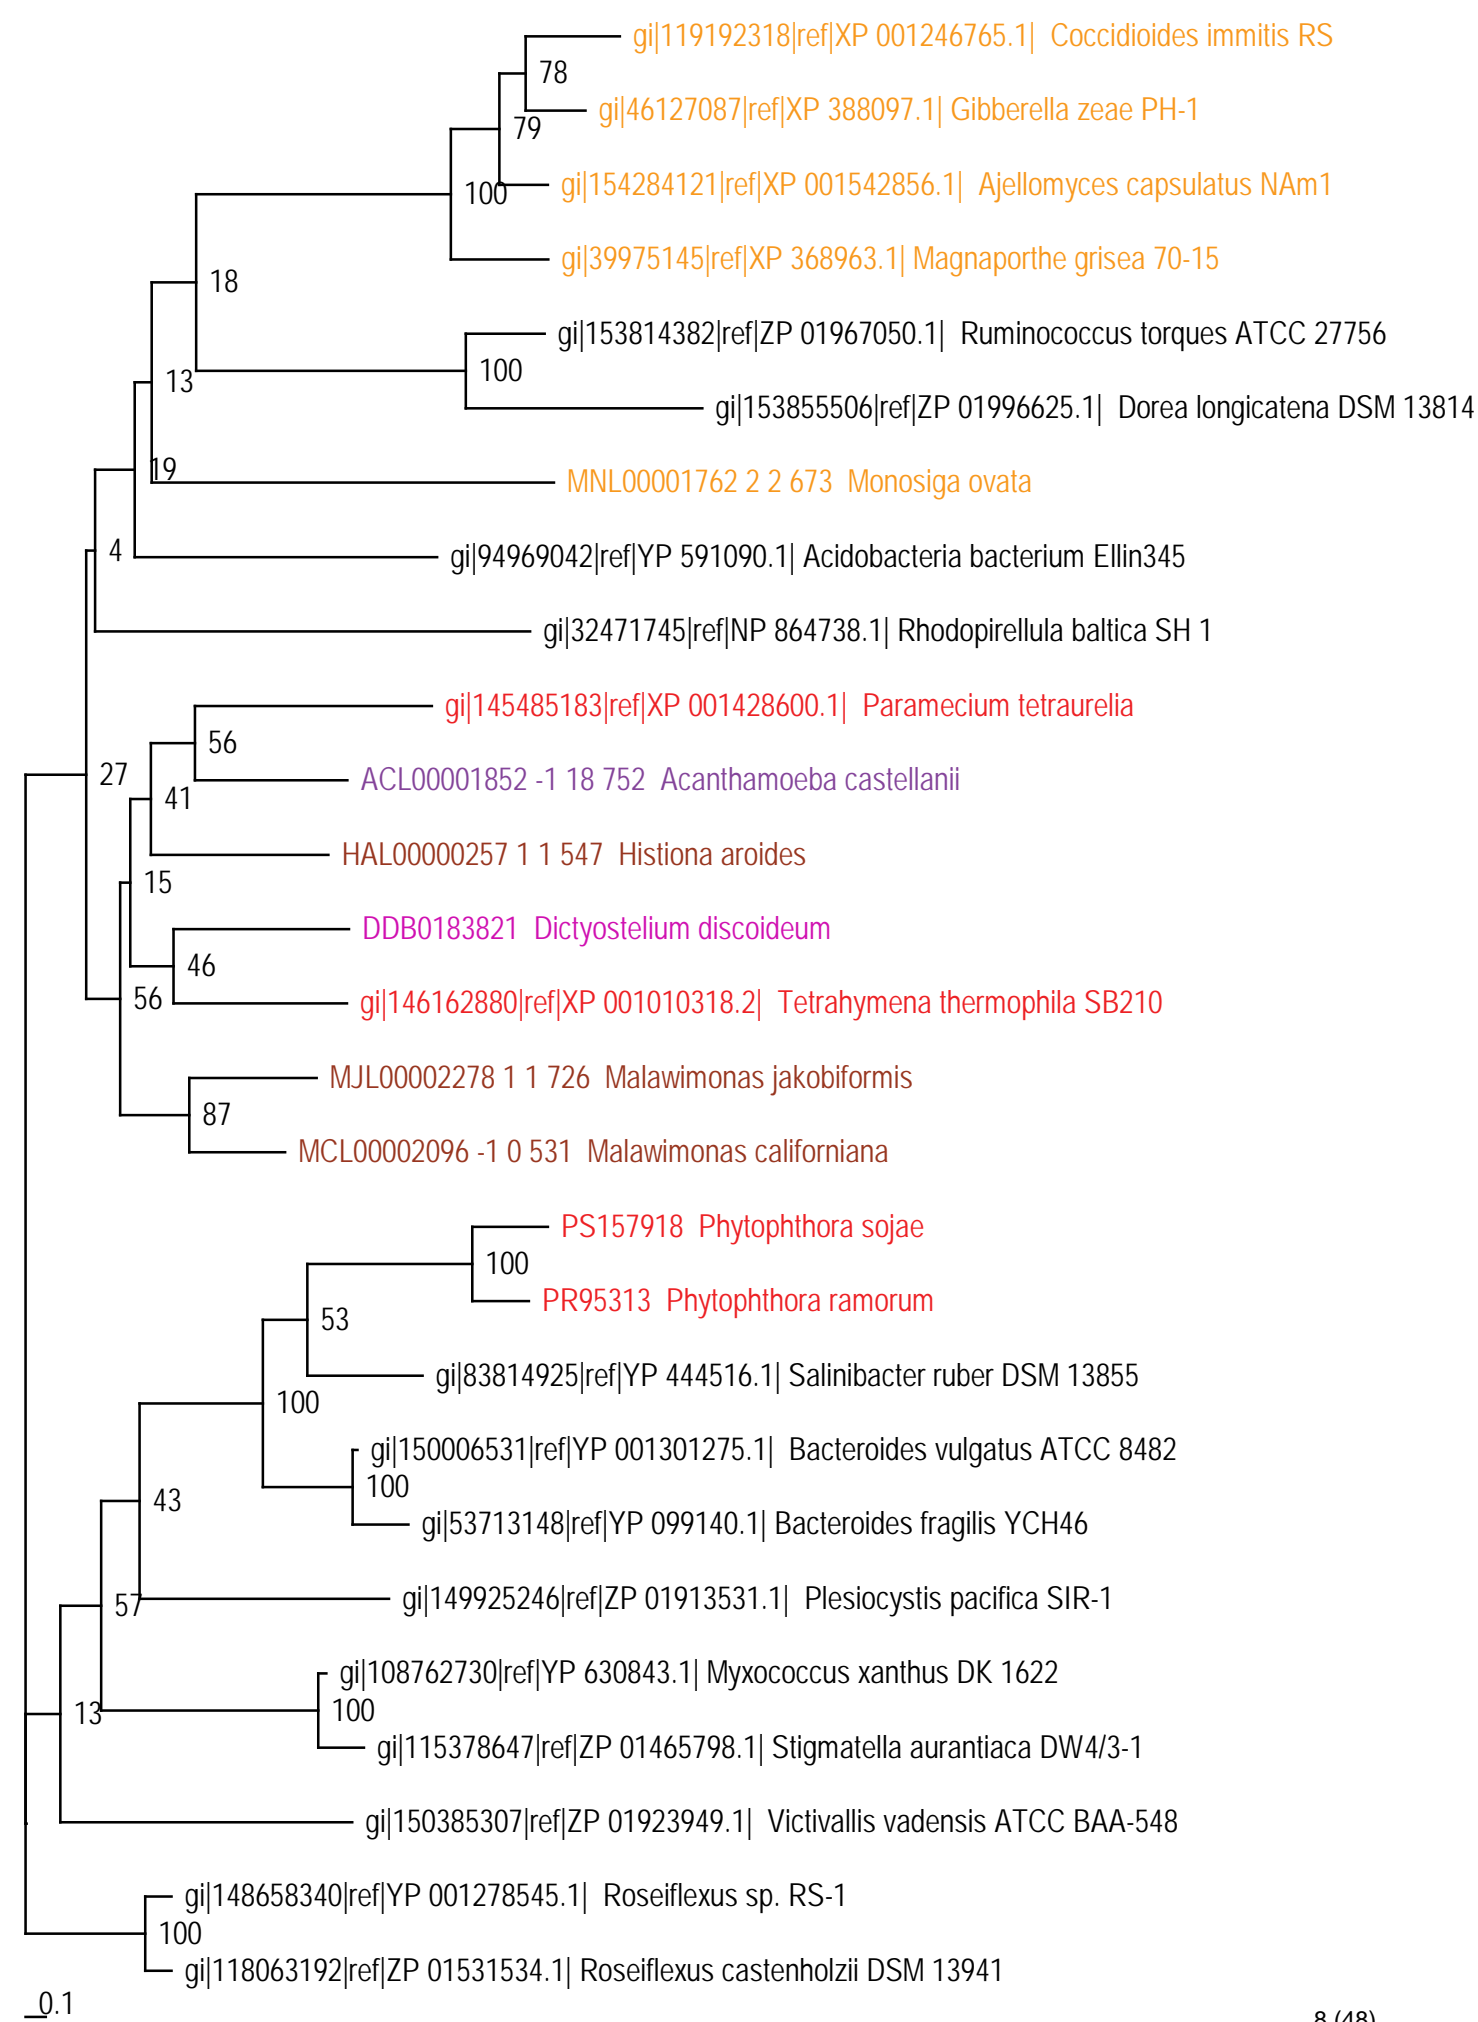



Figure S1AI

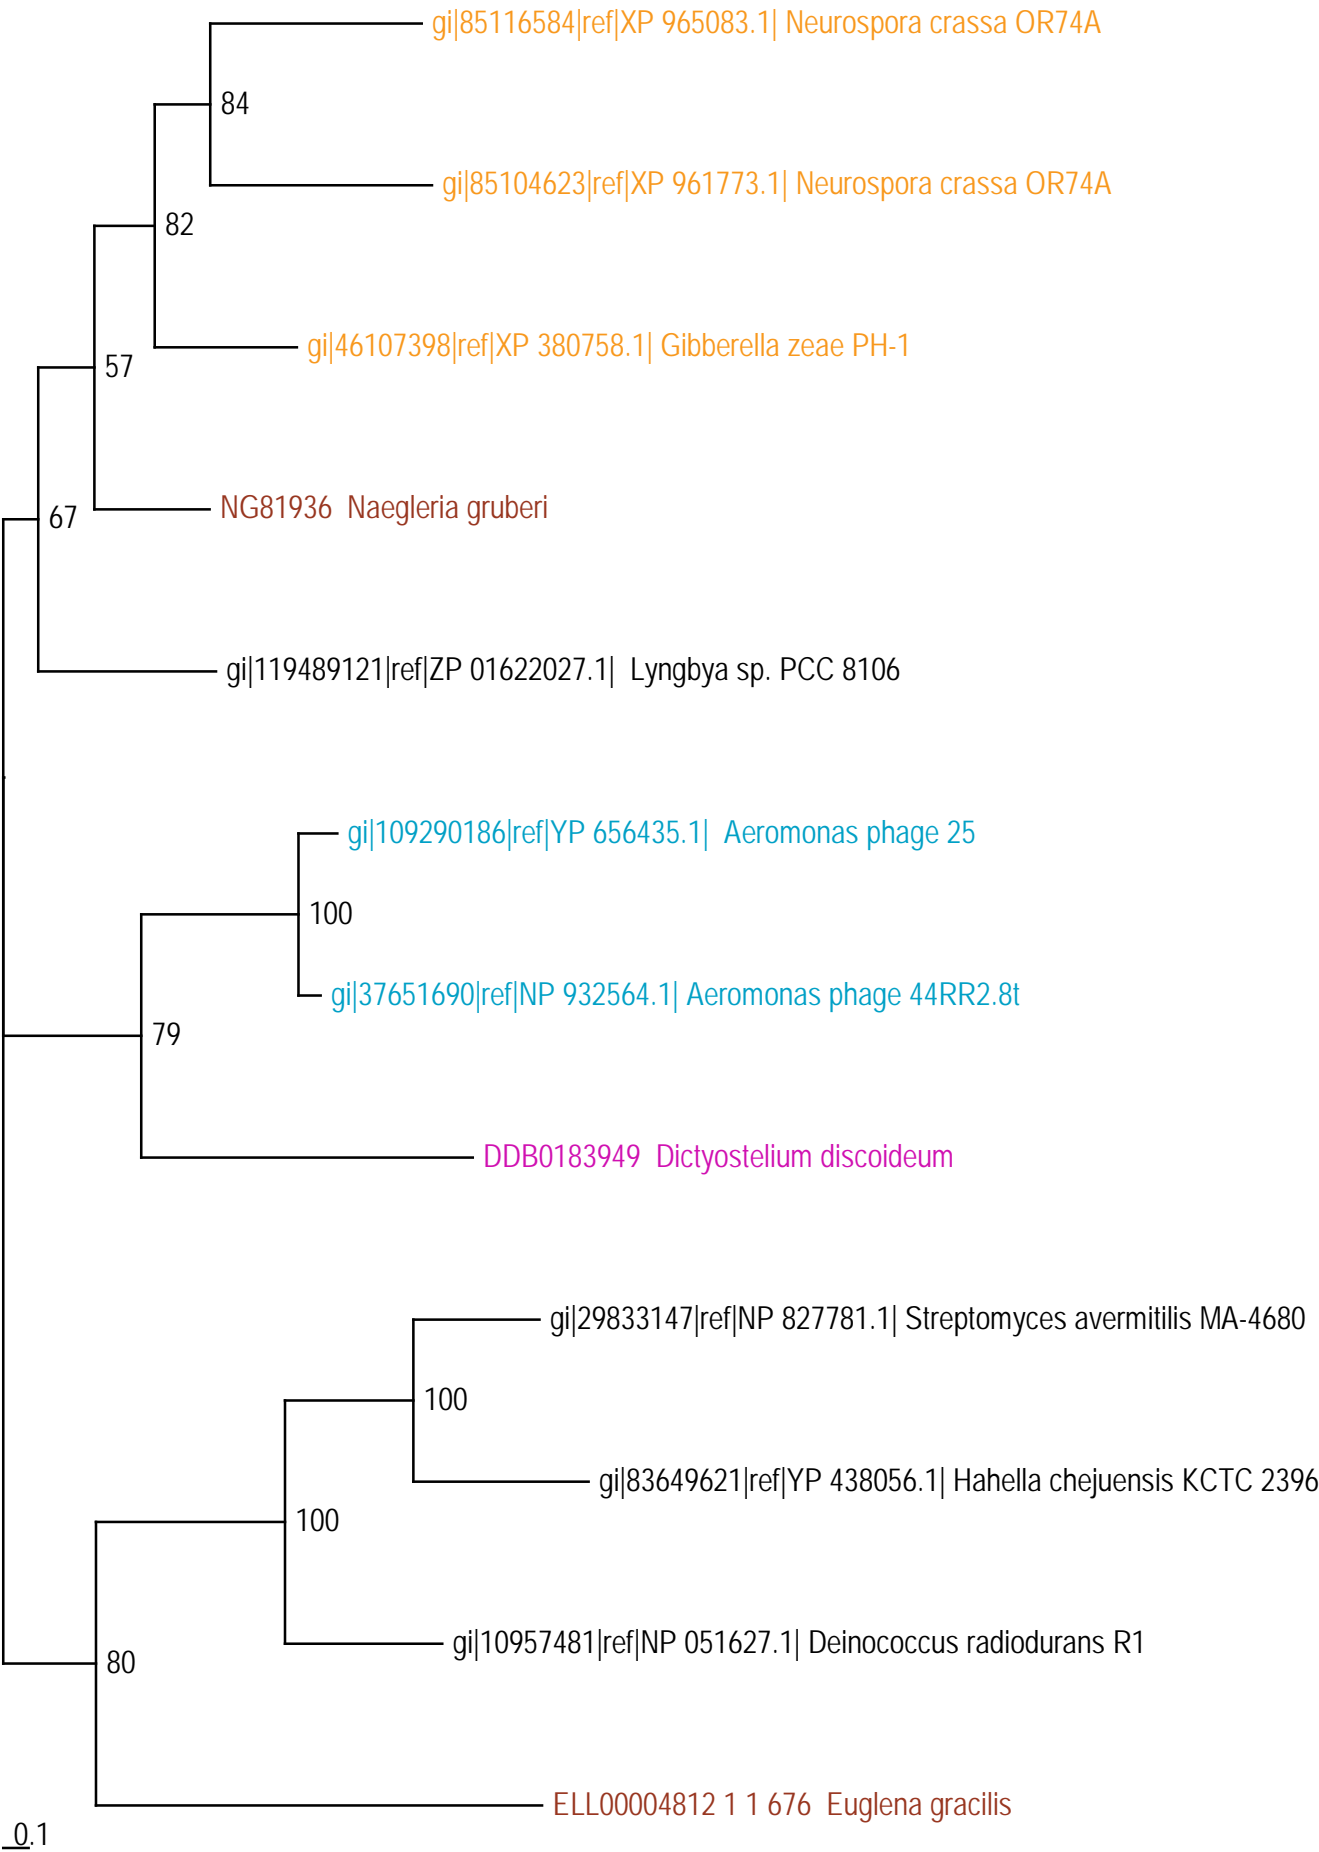

Figure S1AJ

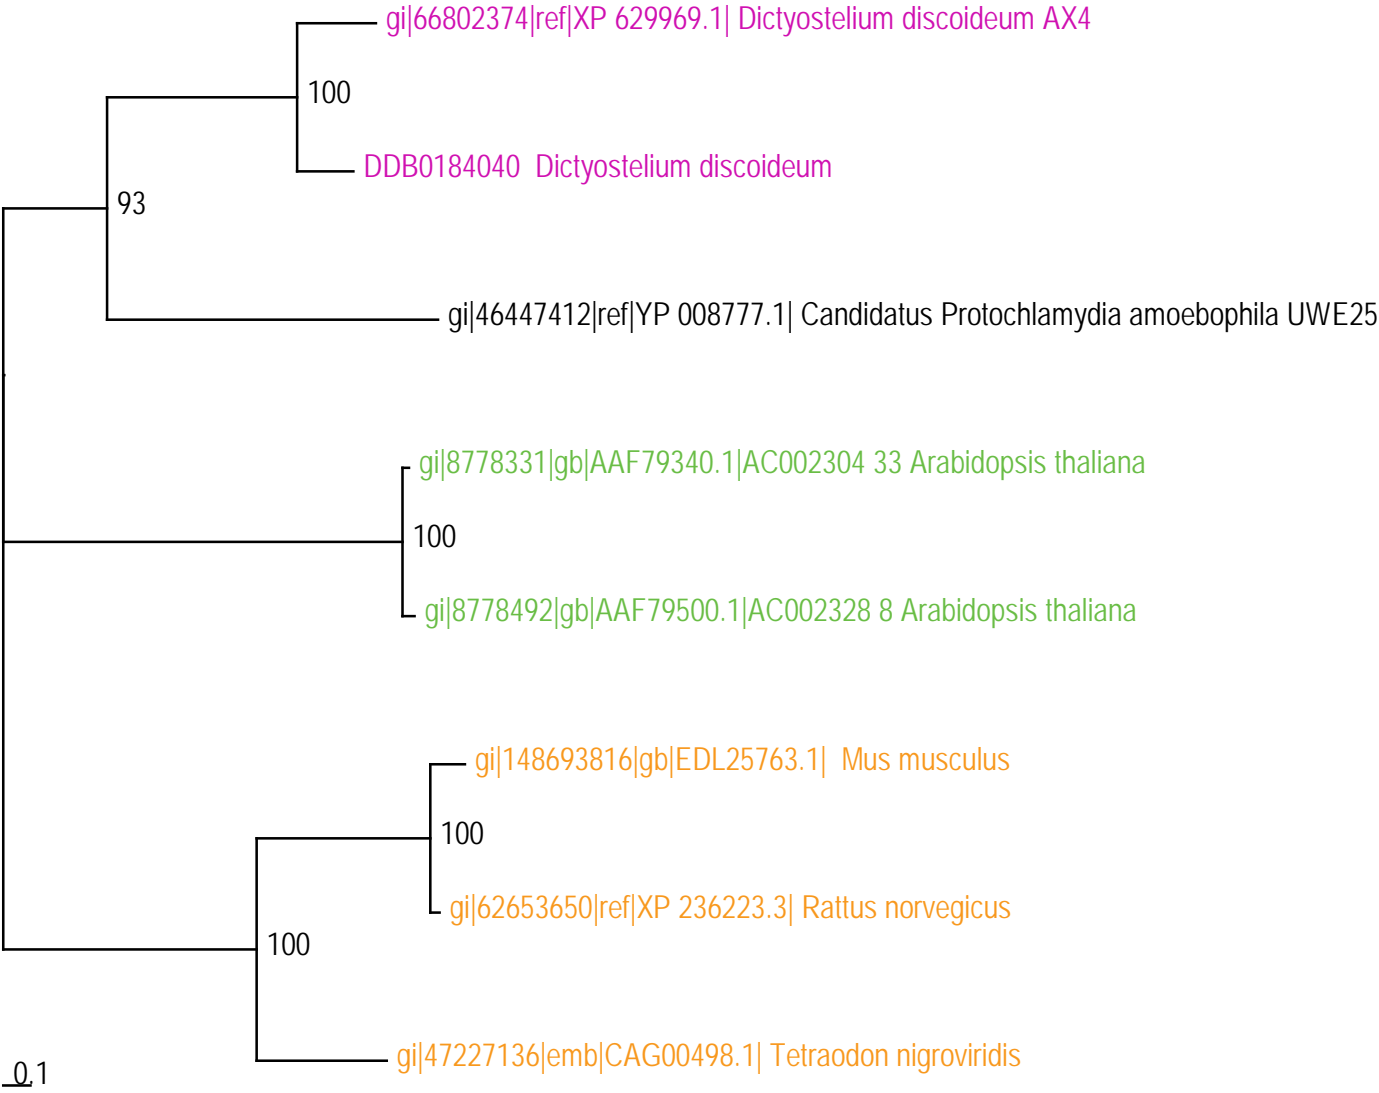

**Figure S1AK**

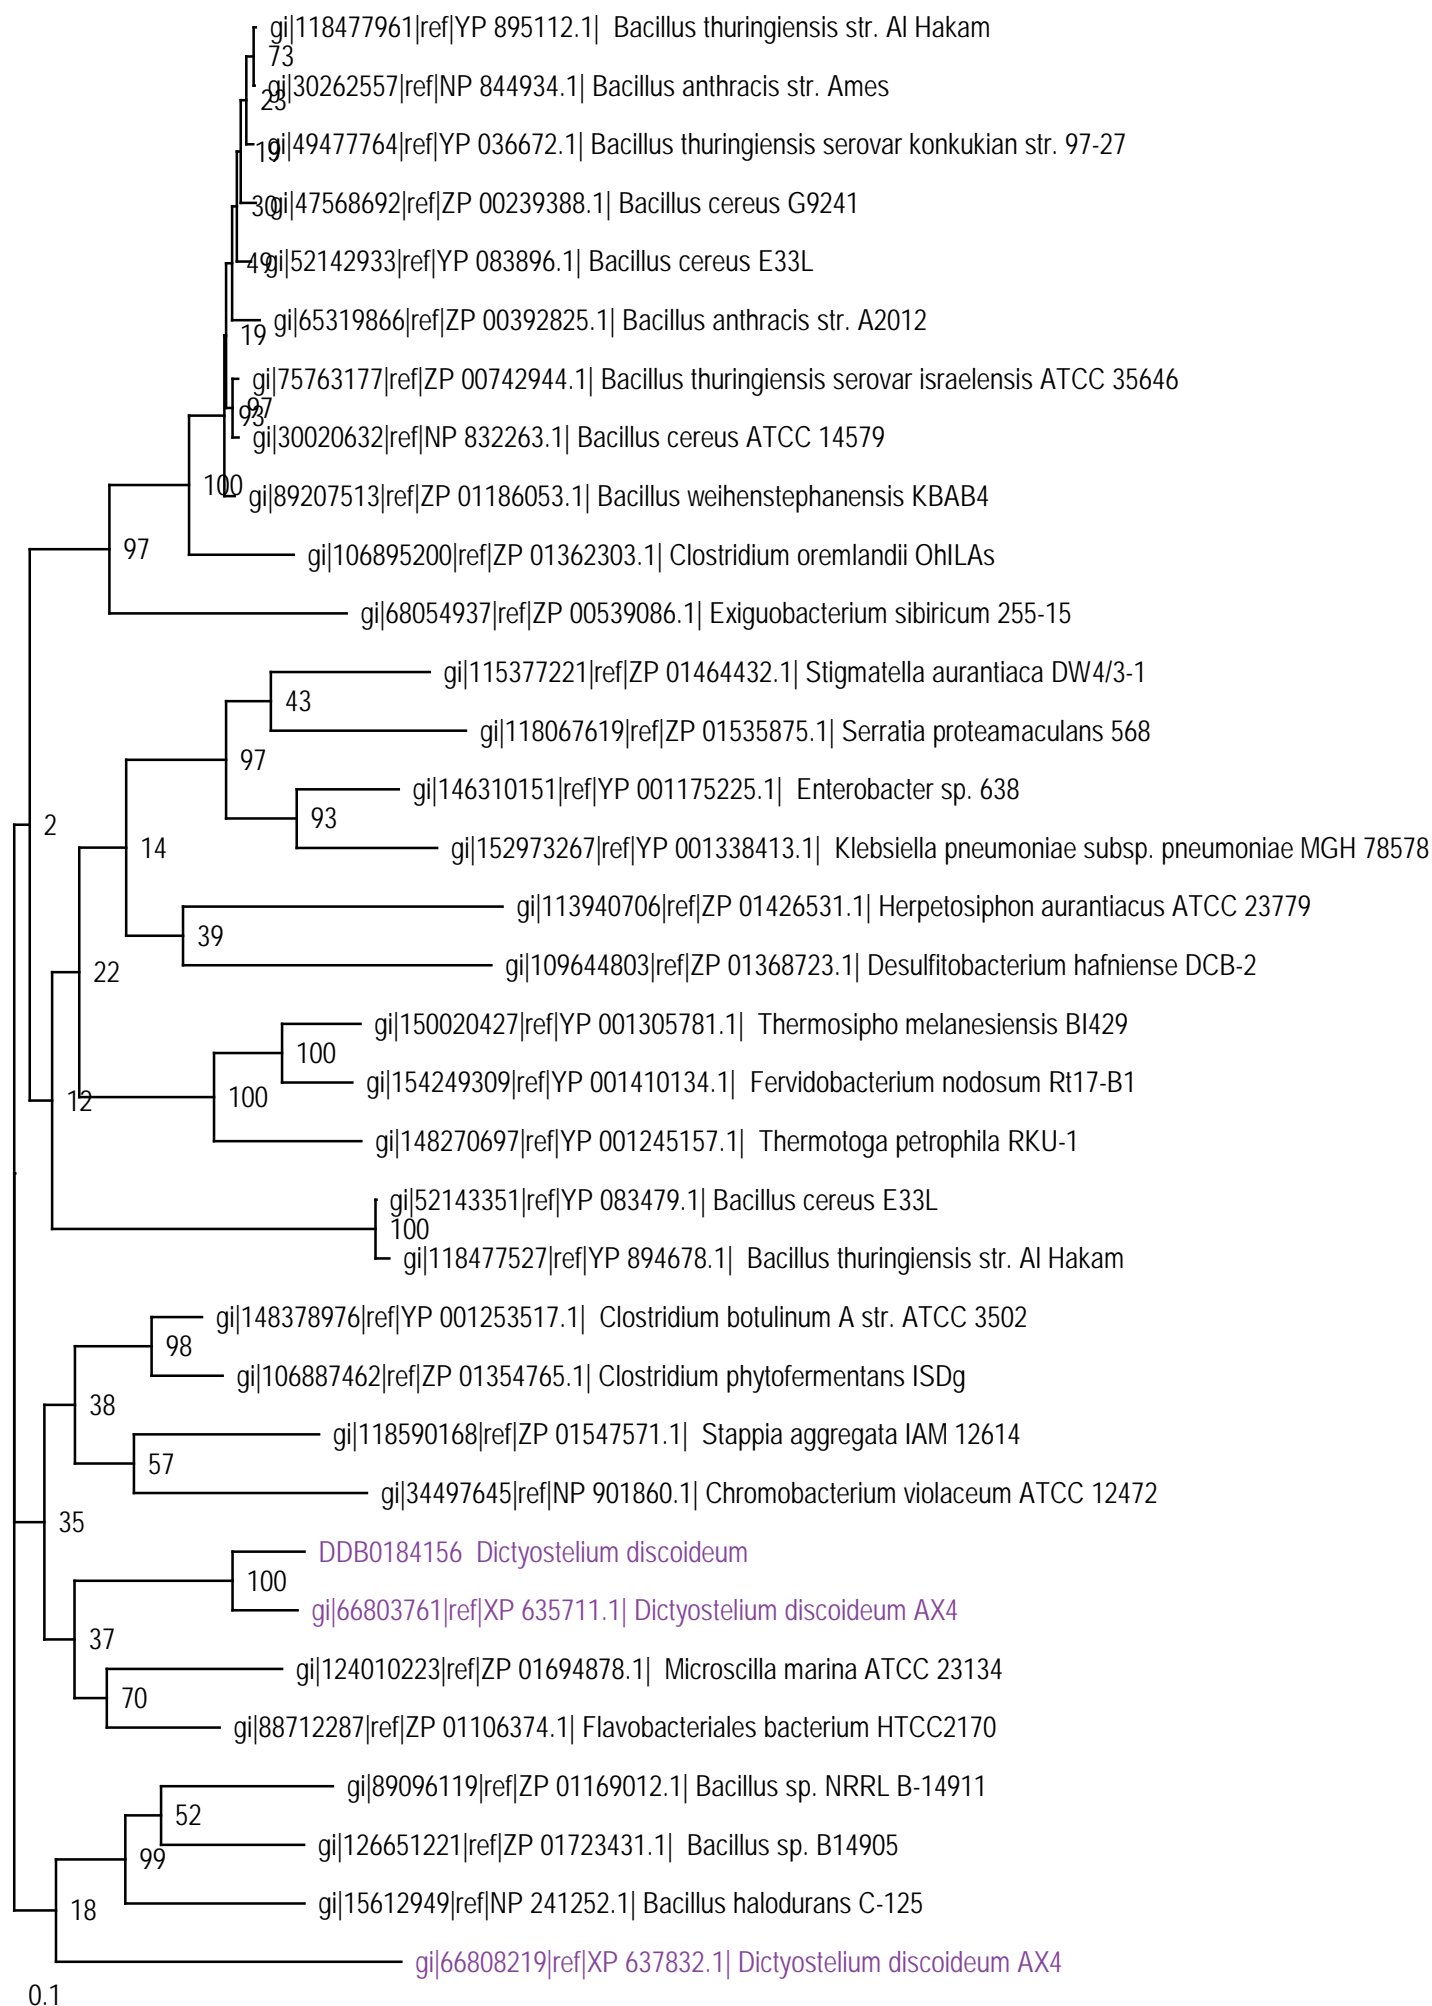

**Figure S1AL**

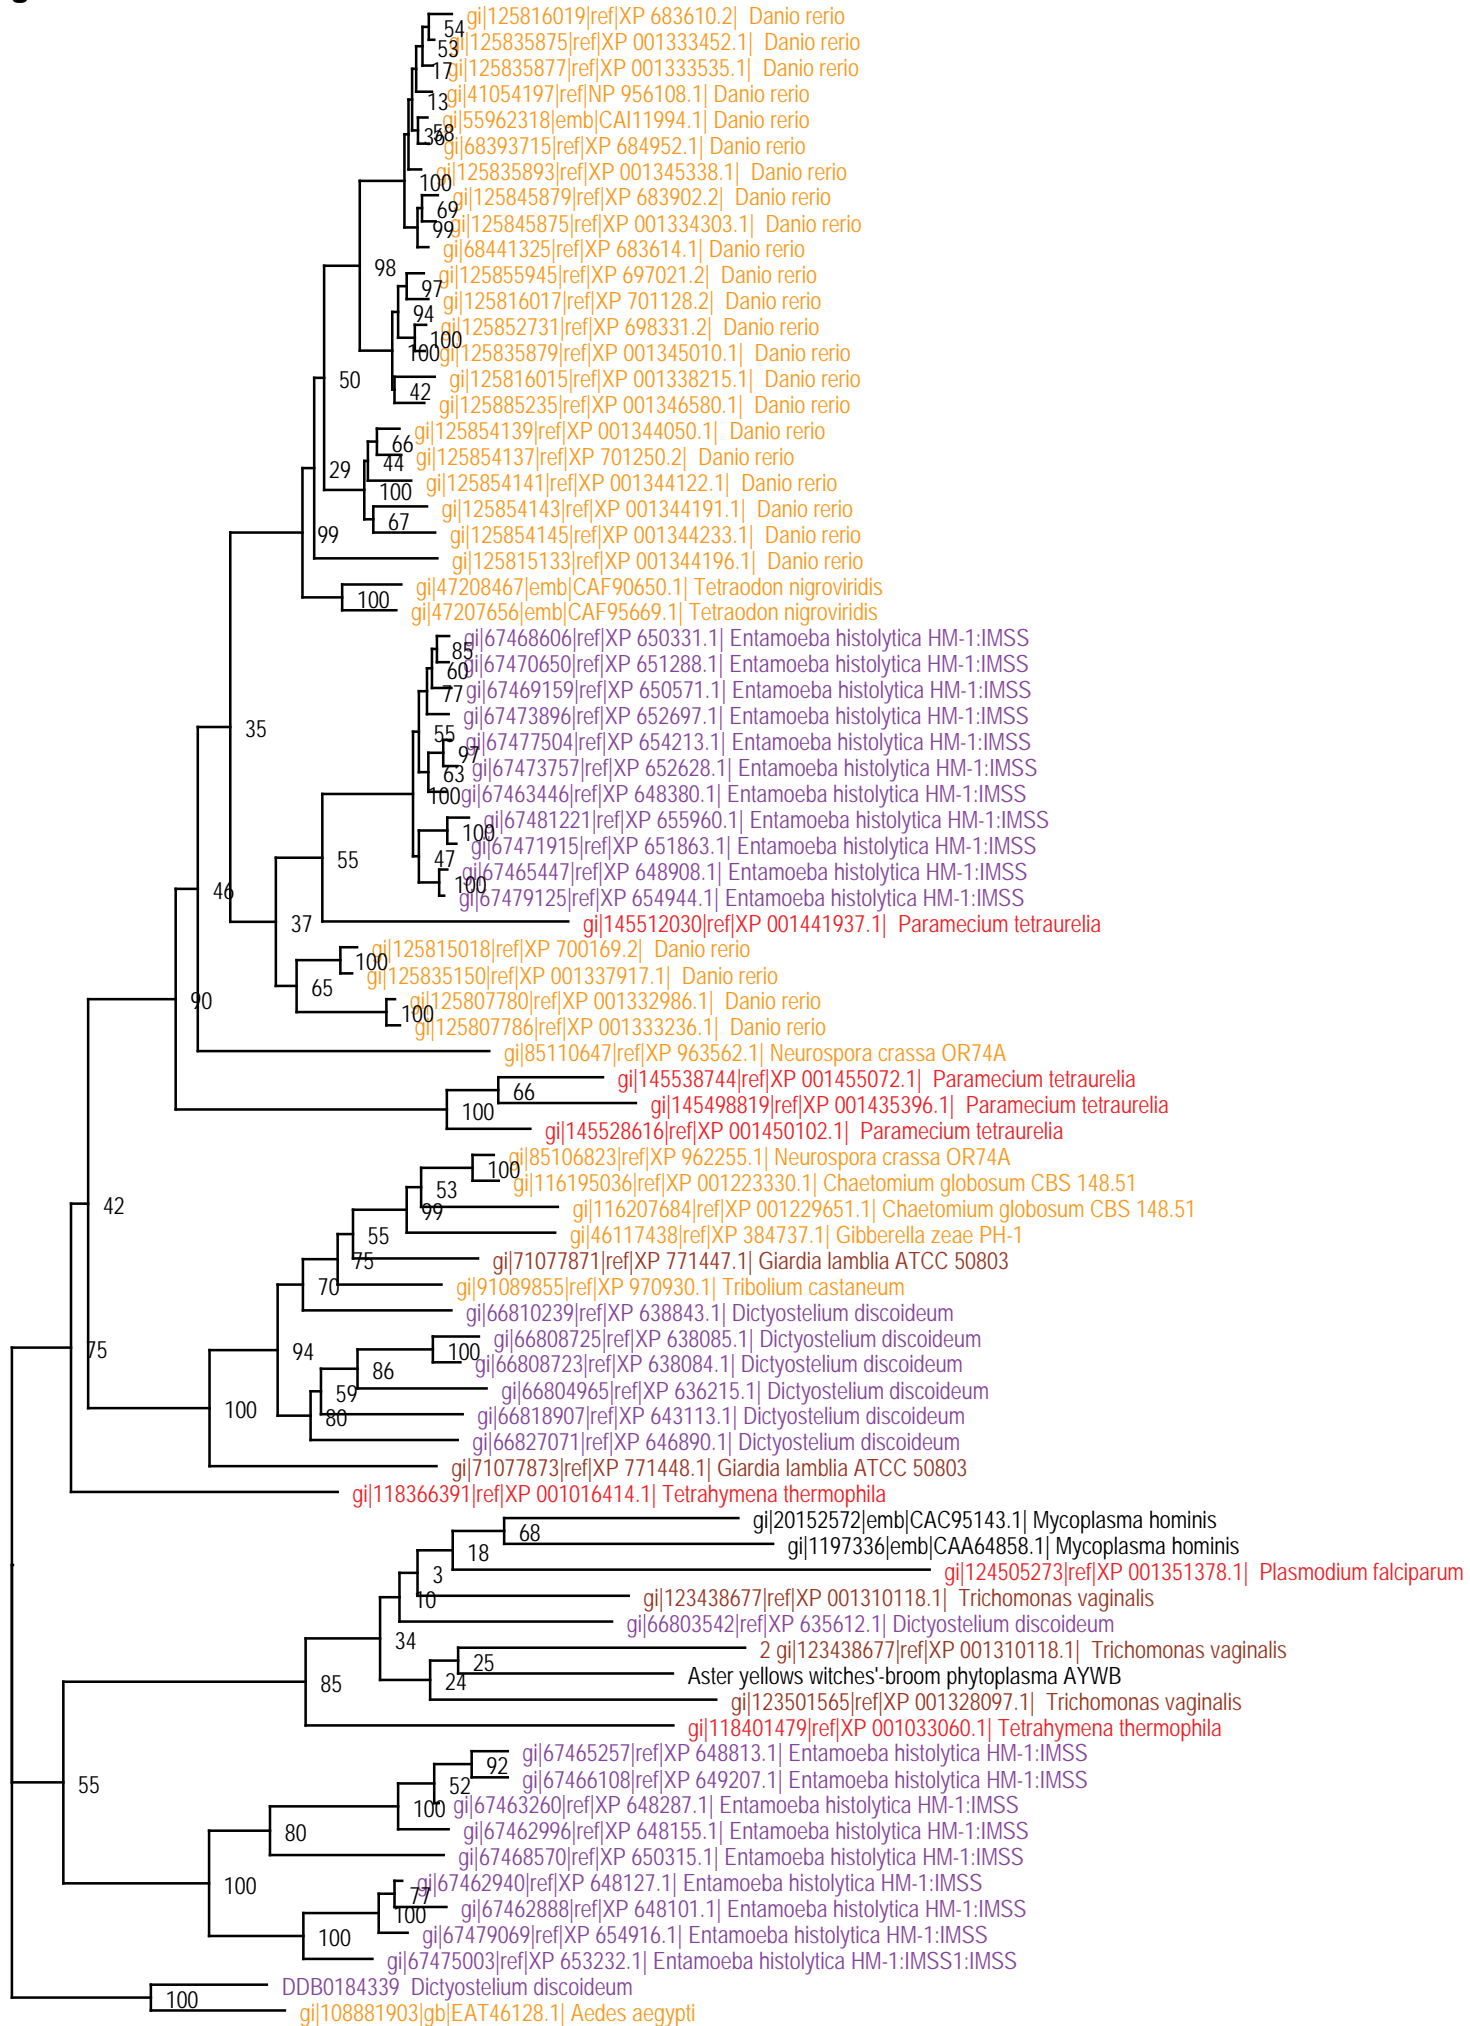

**Figure S1AM**

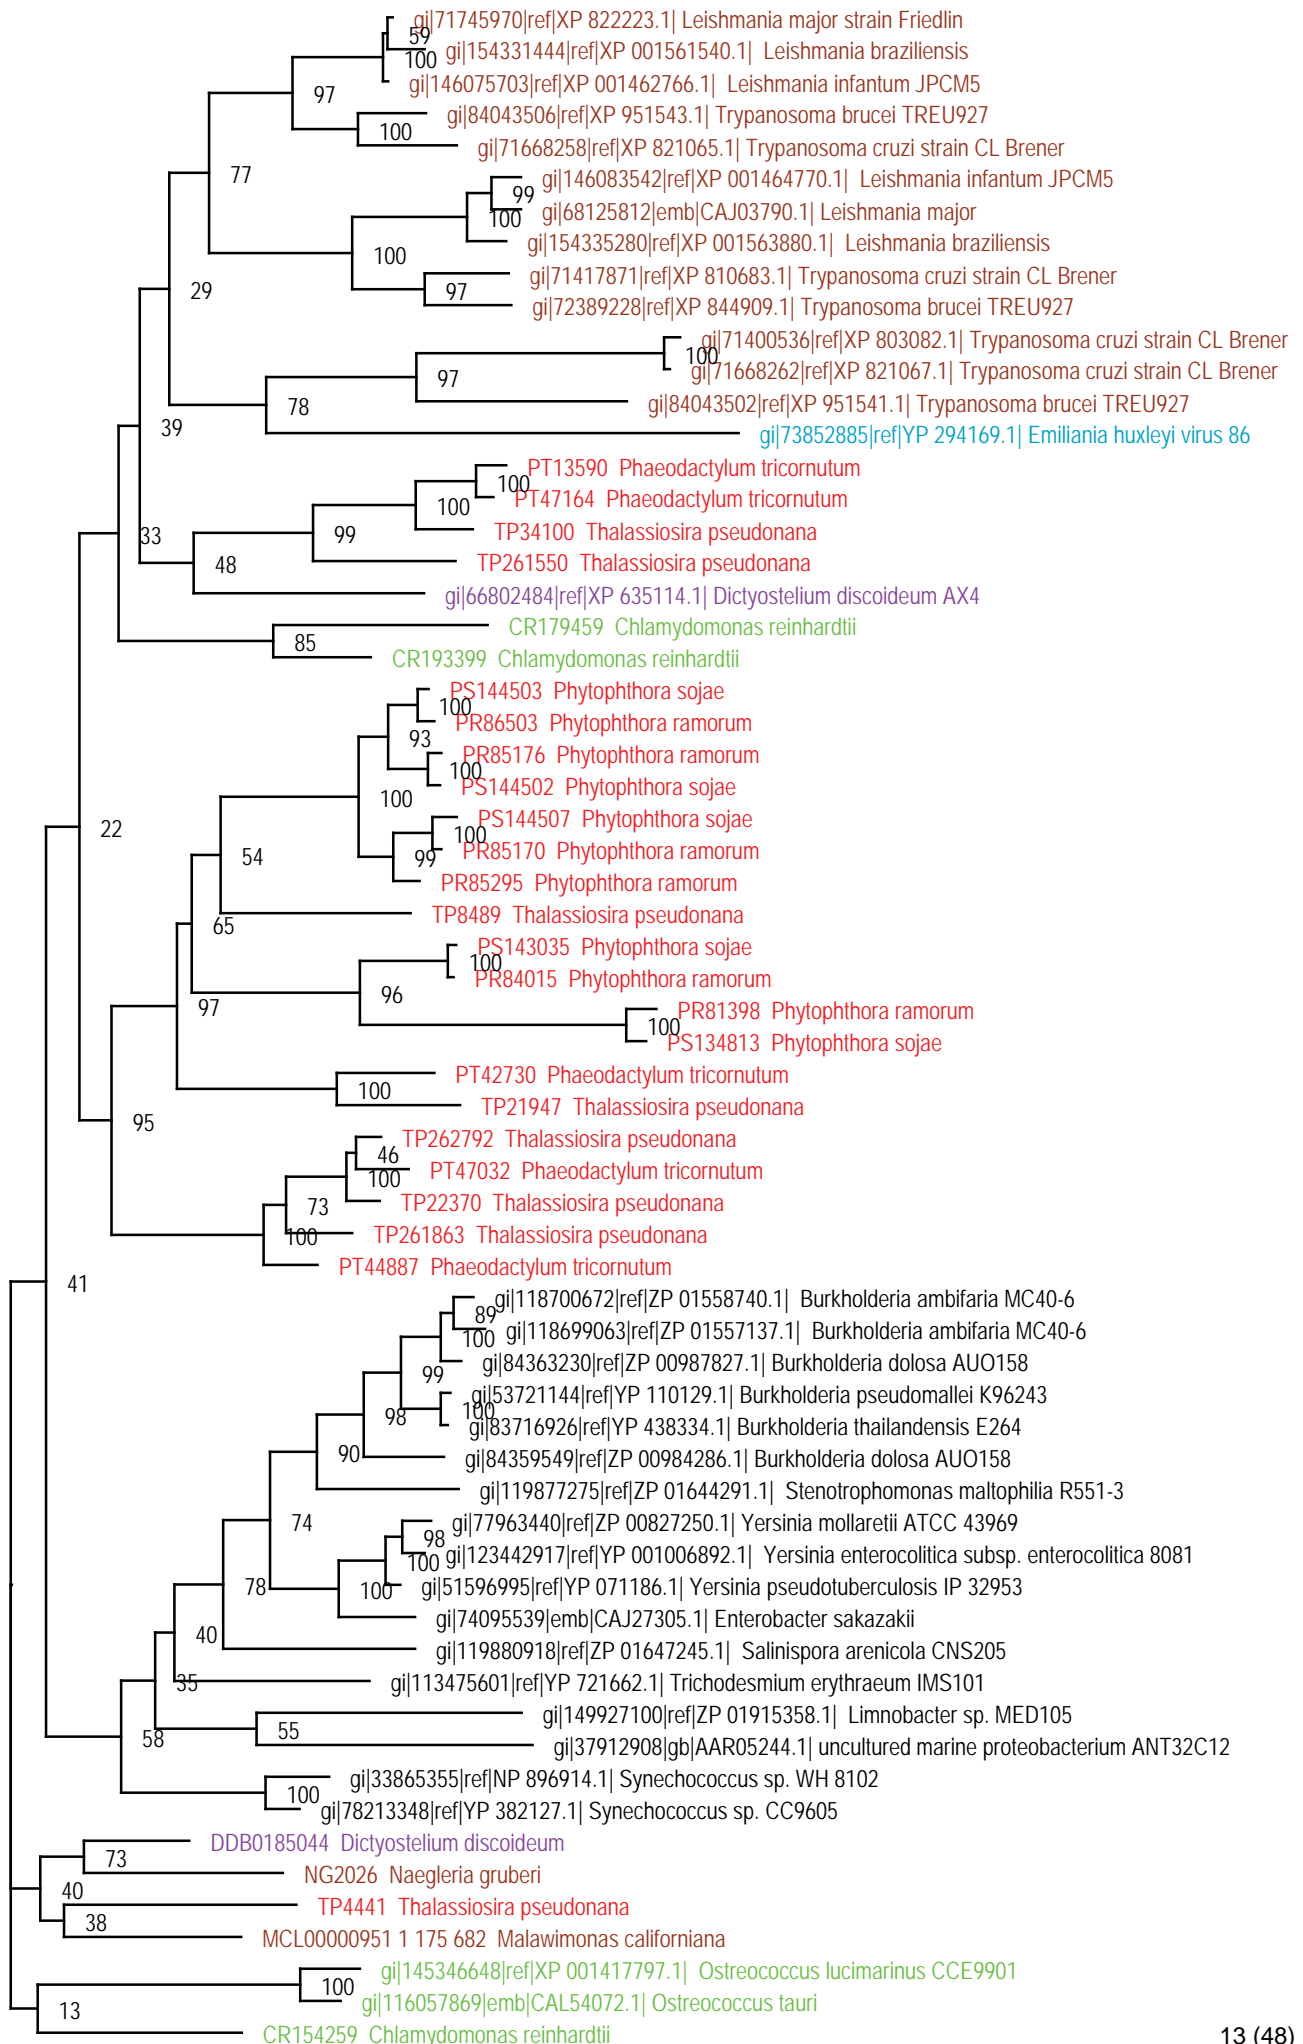

Figure S1AN

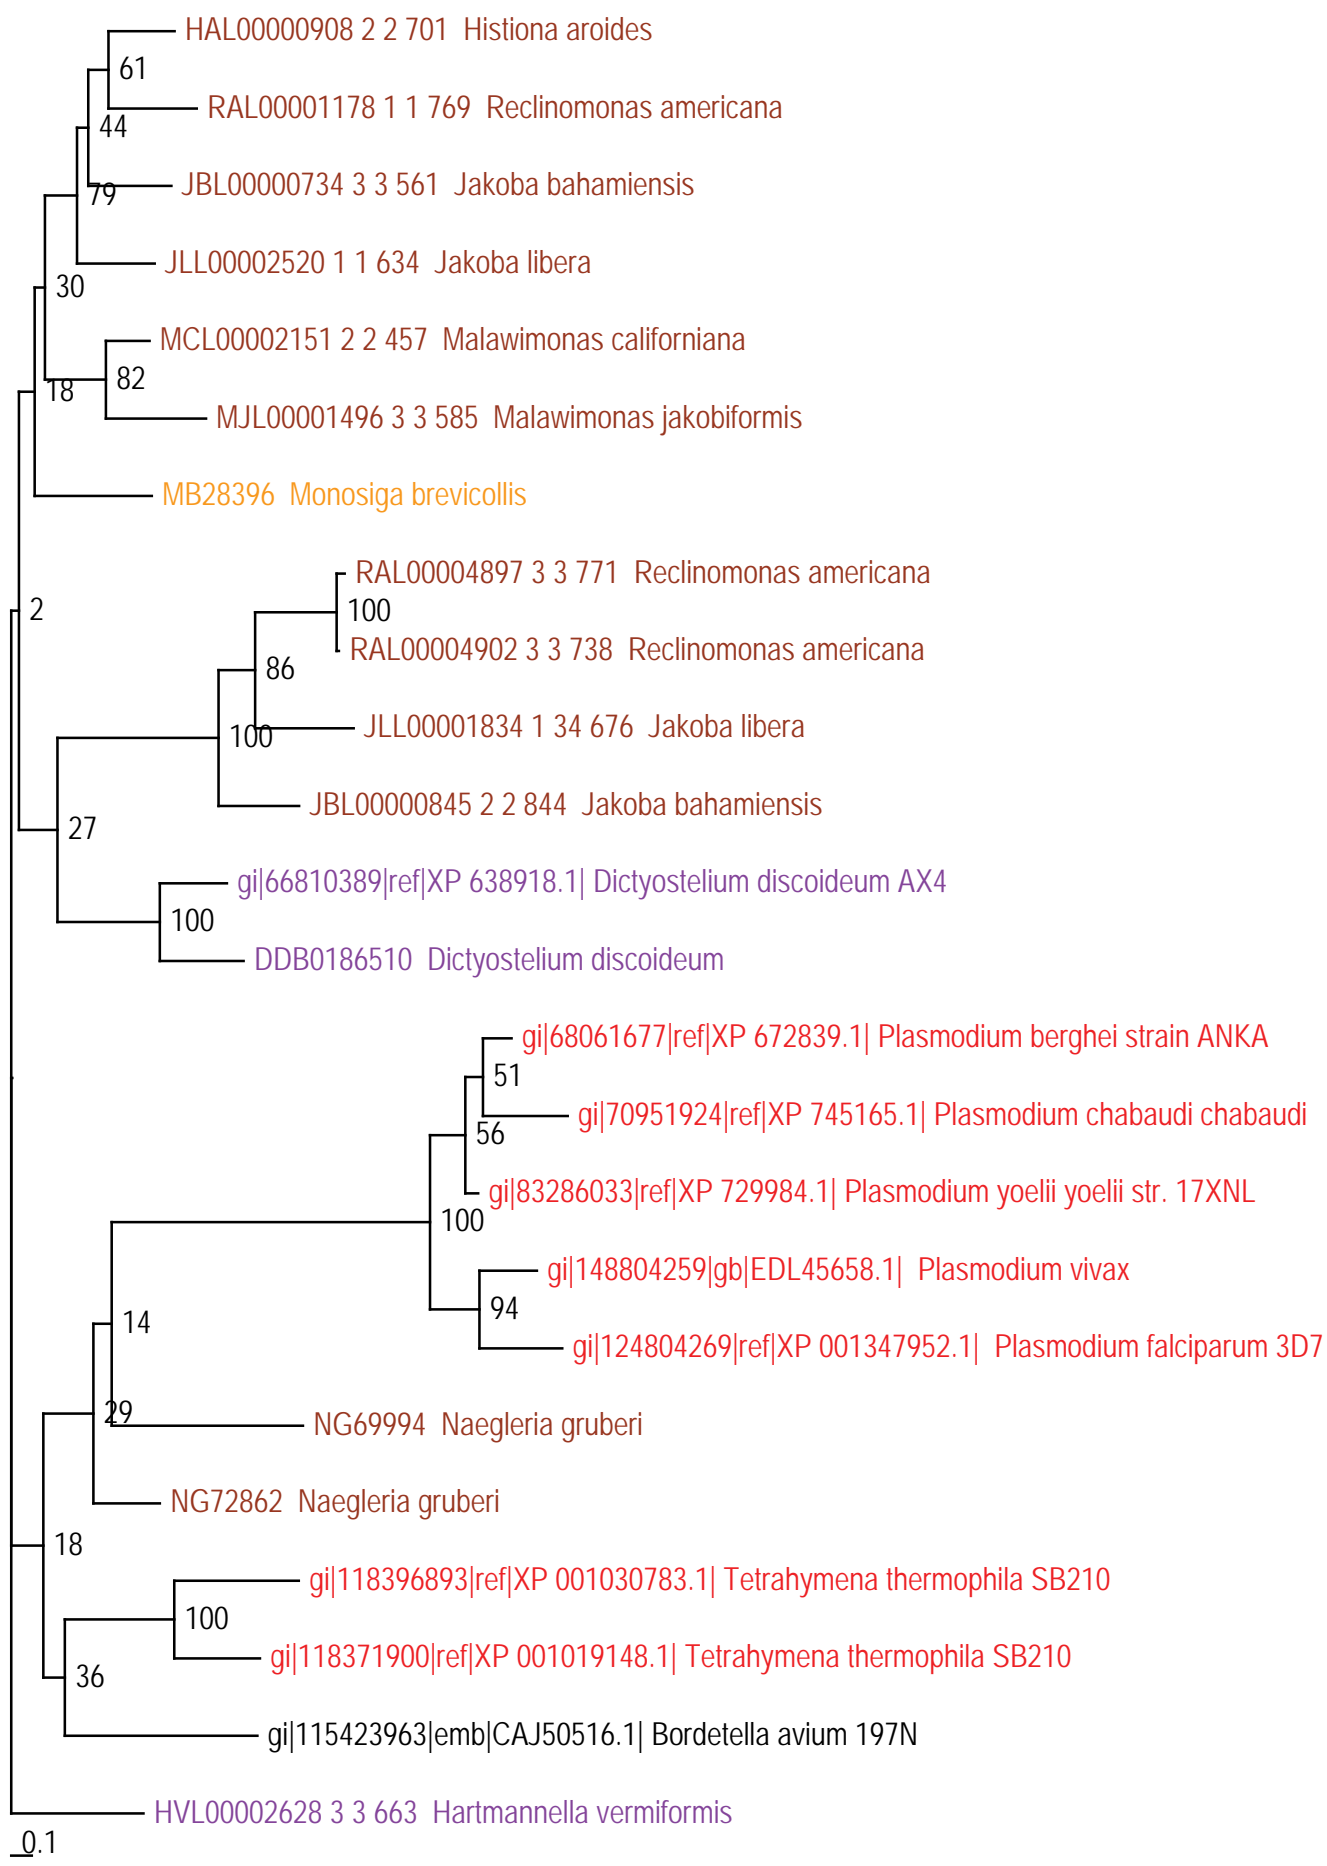

Figure S1AO

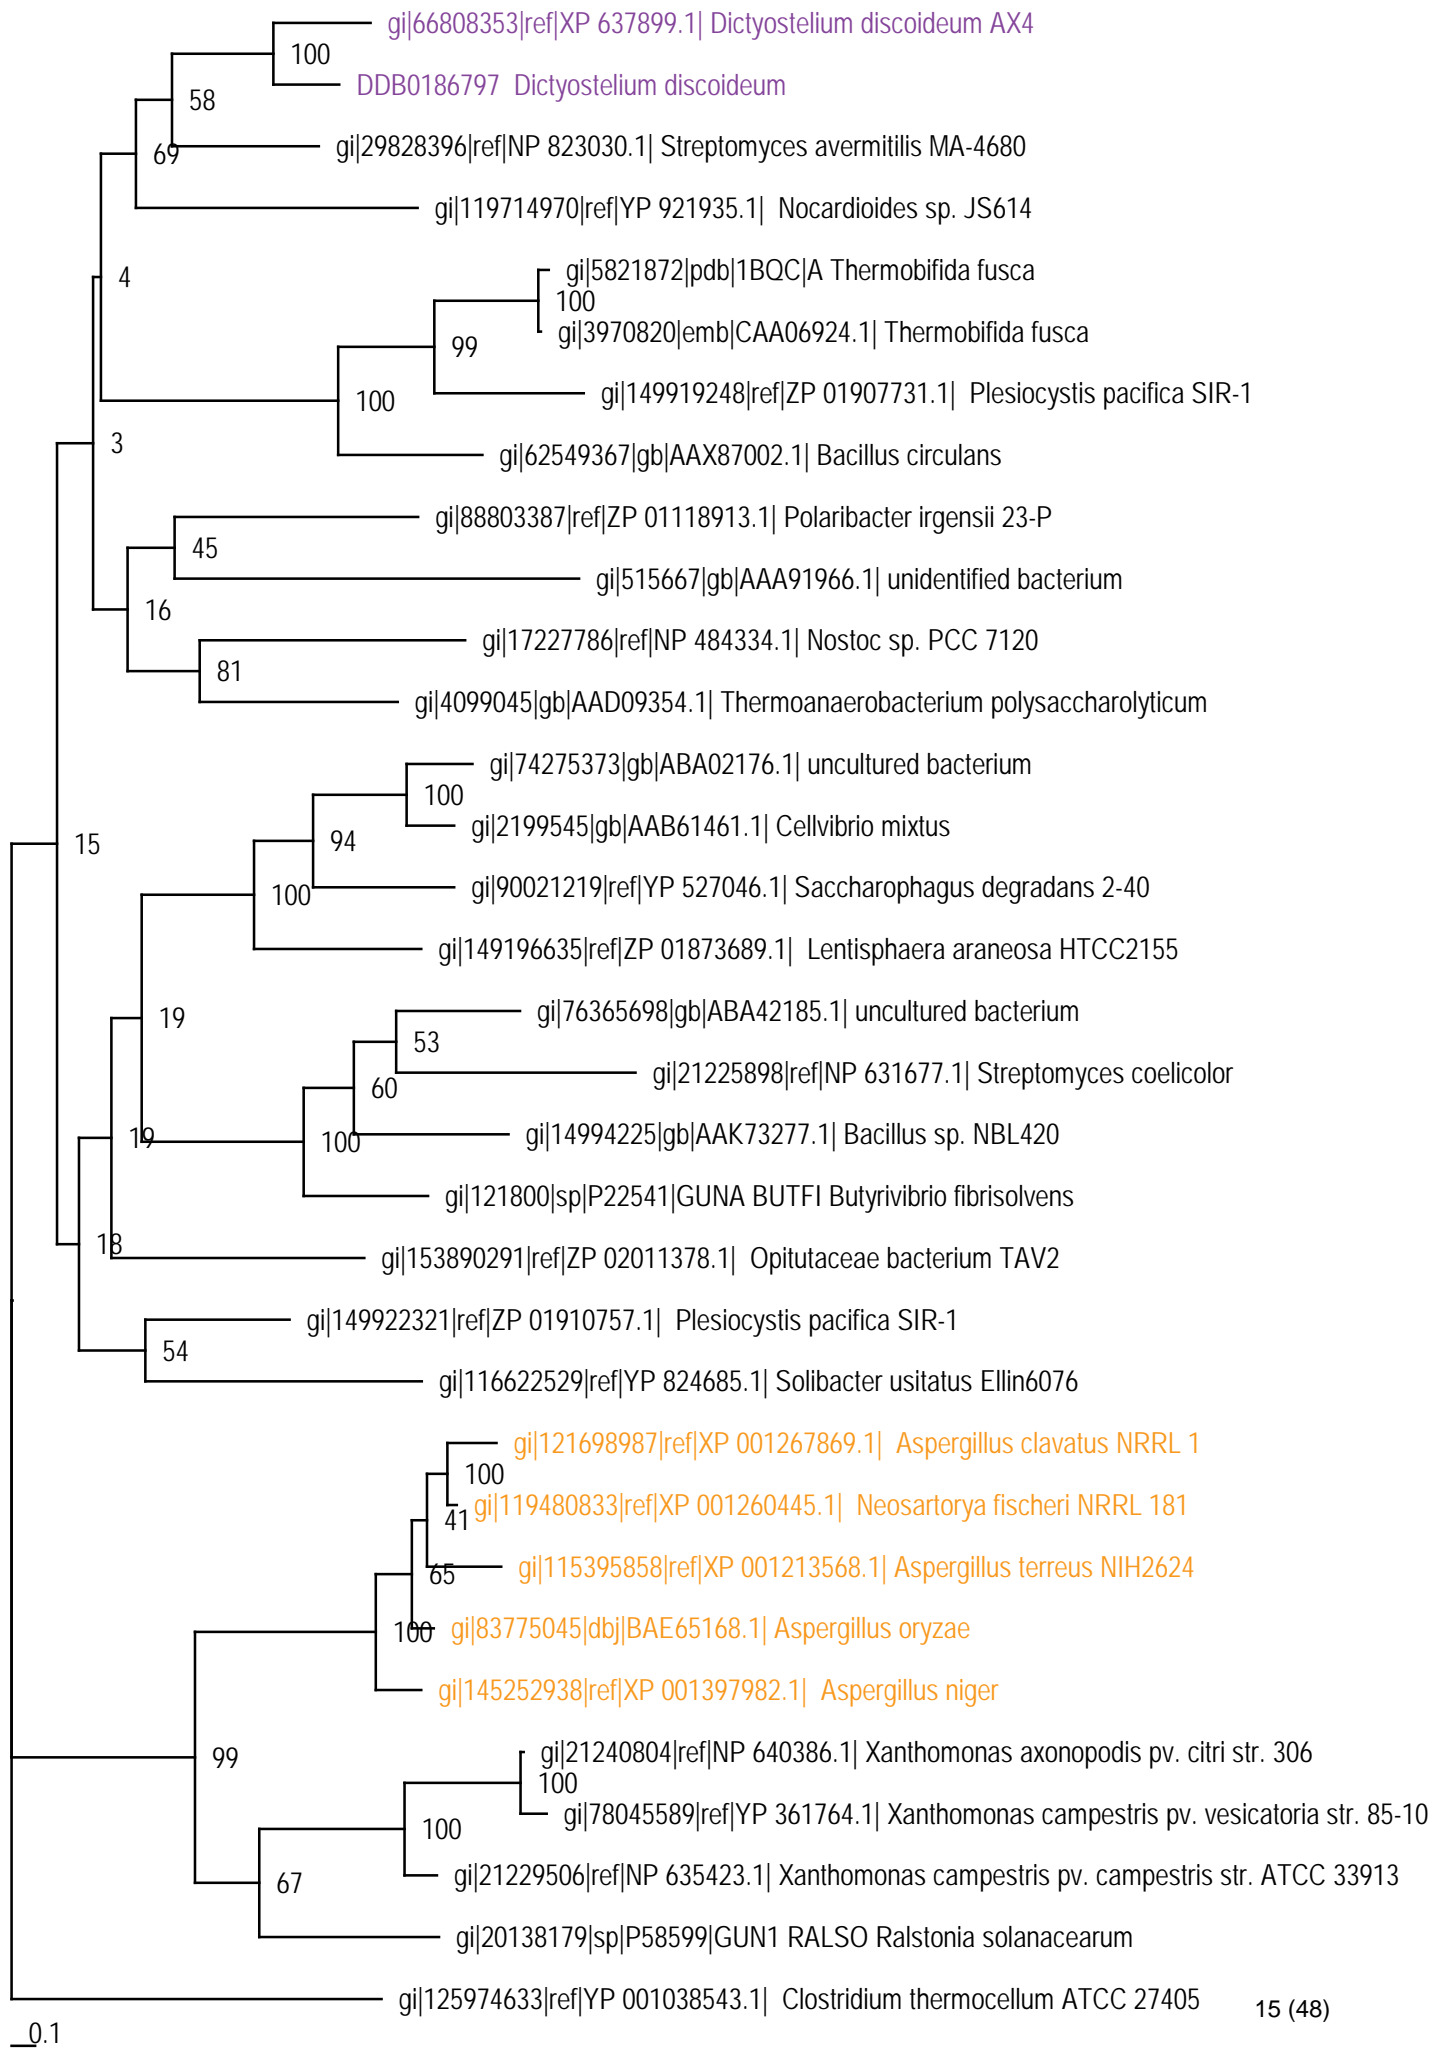

Figure S1AP

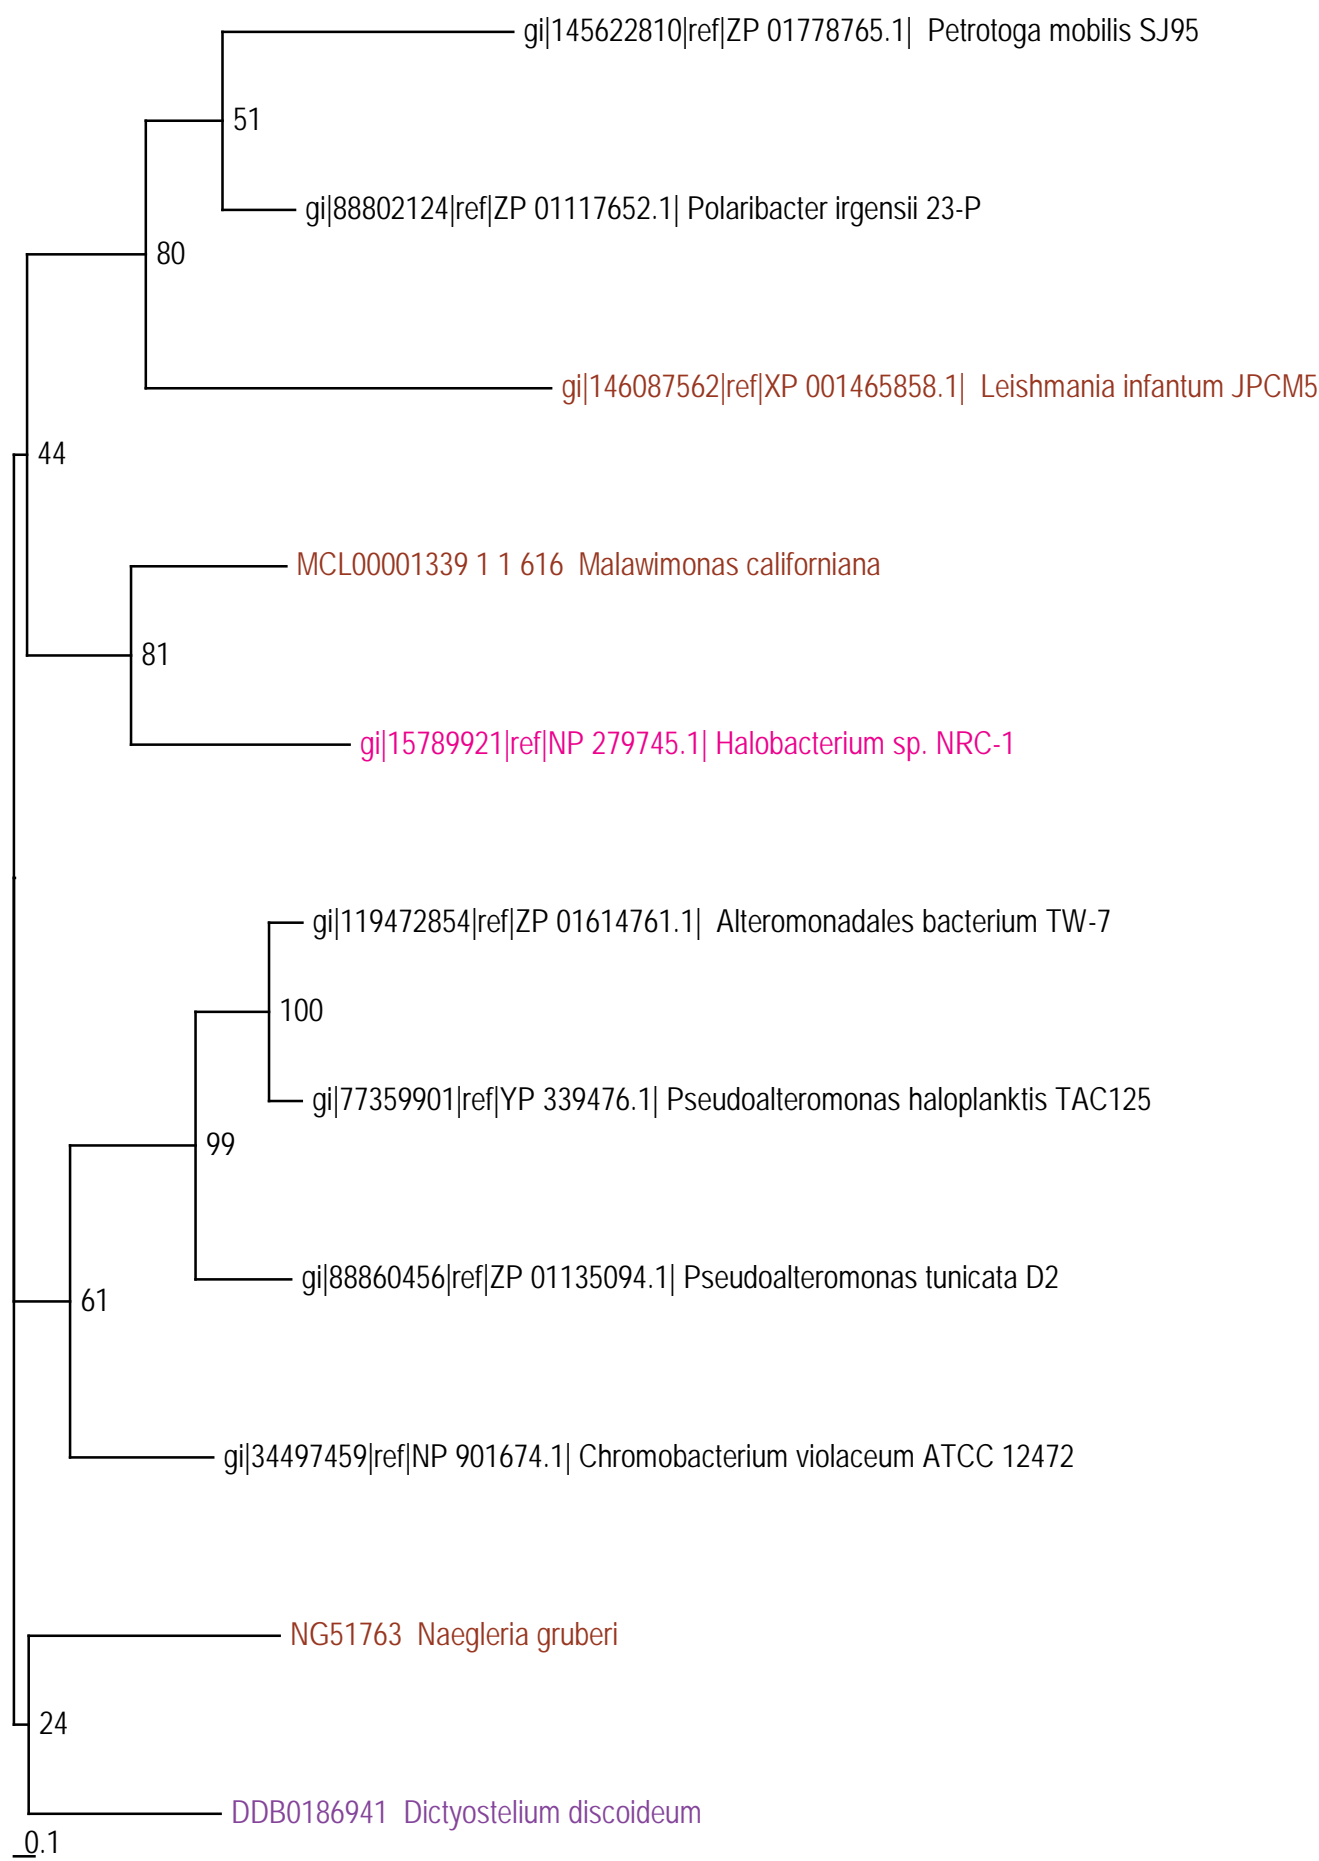



Figure S1AQ

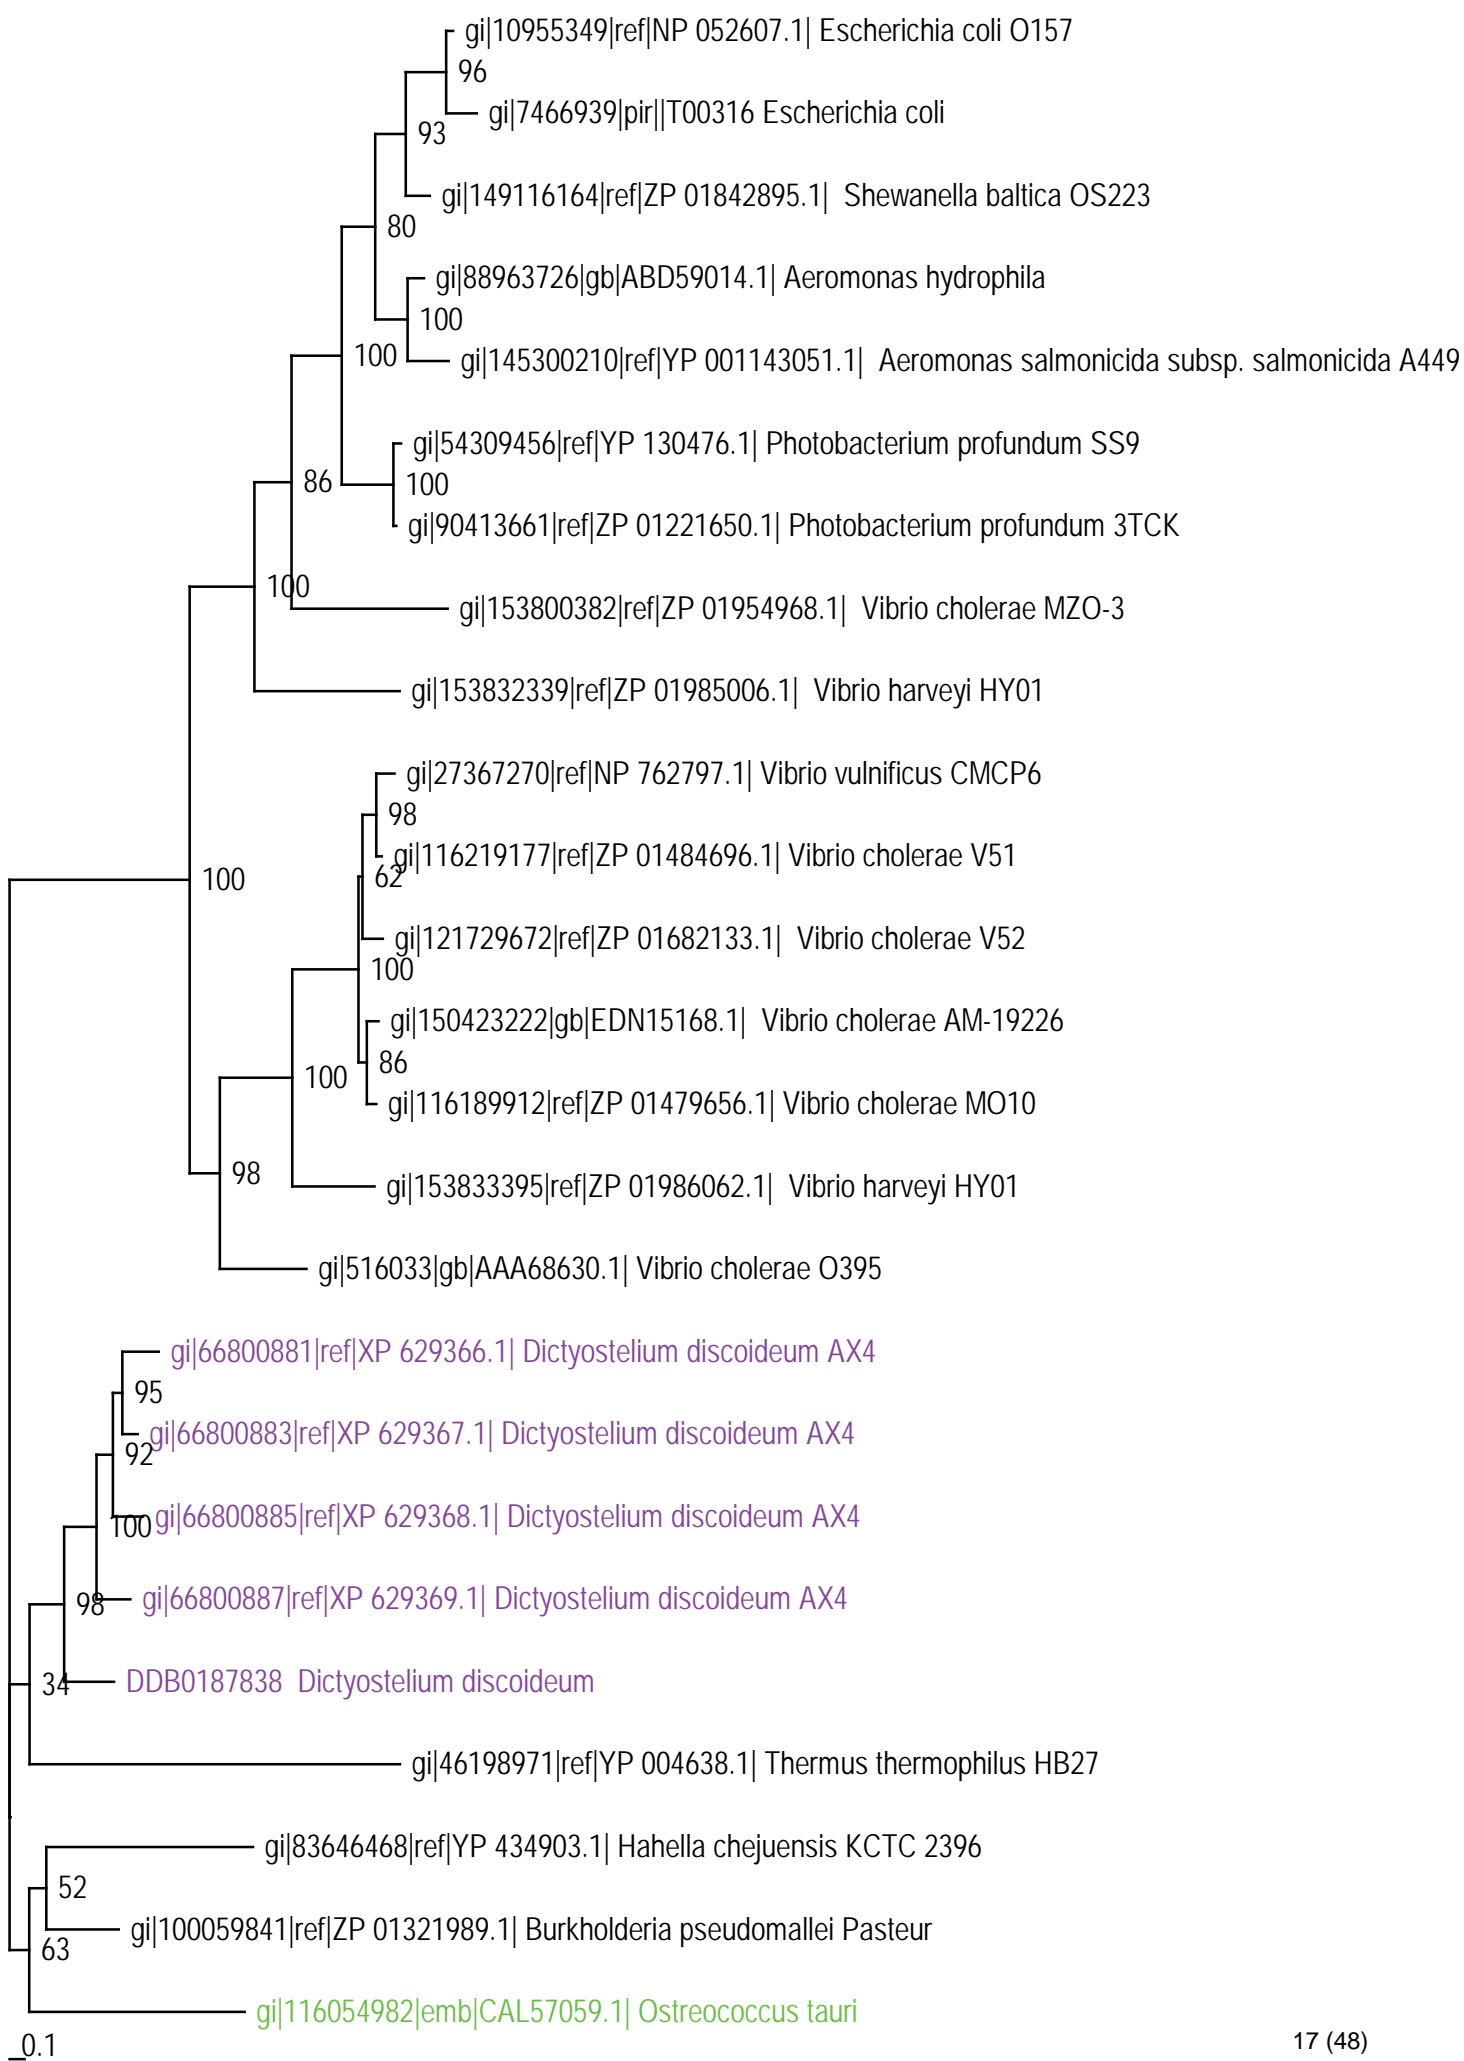

Figure S1AR

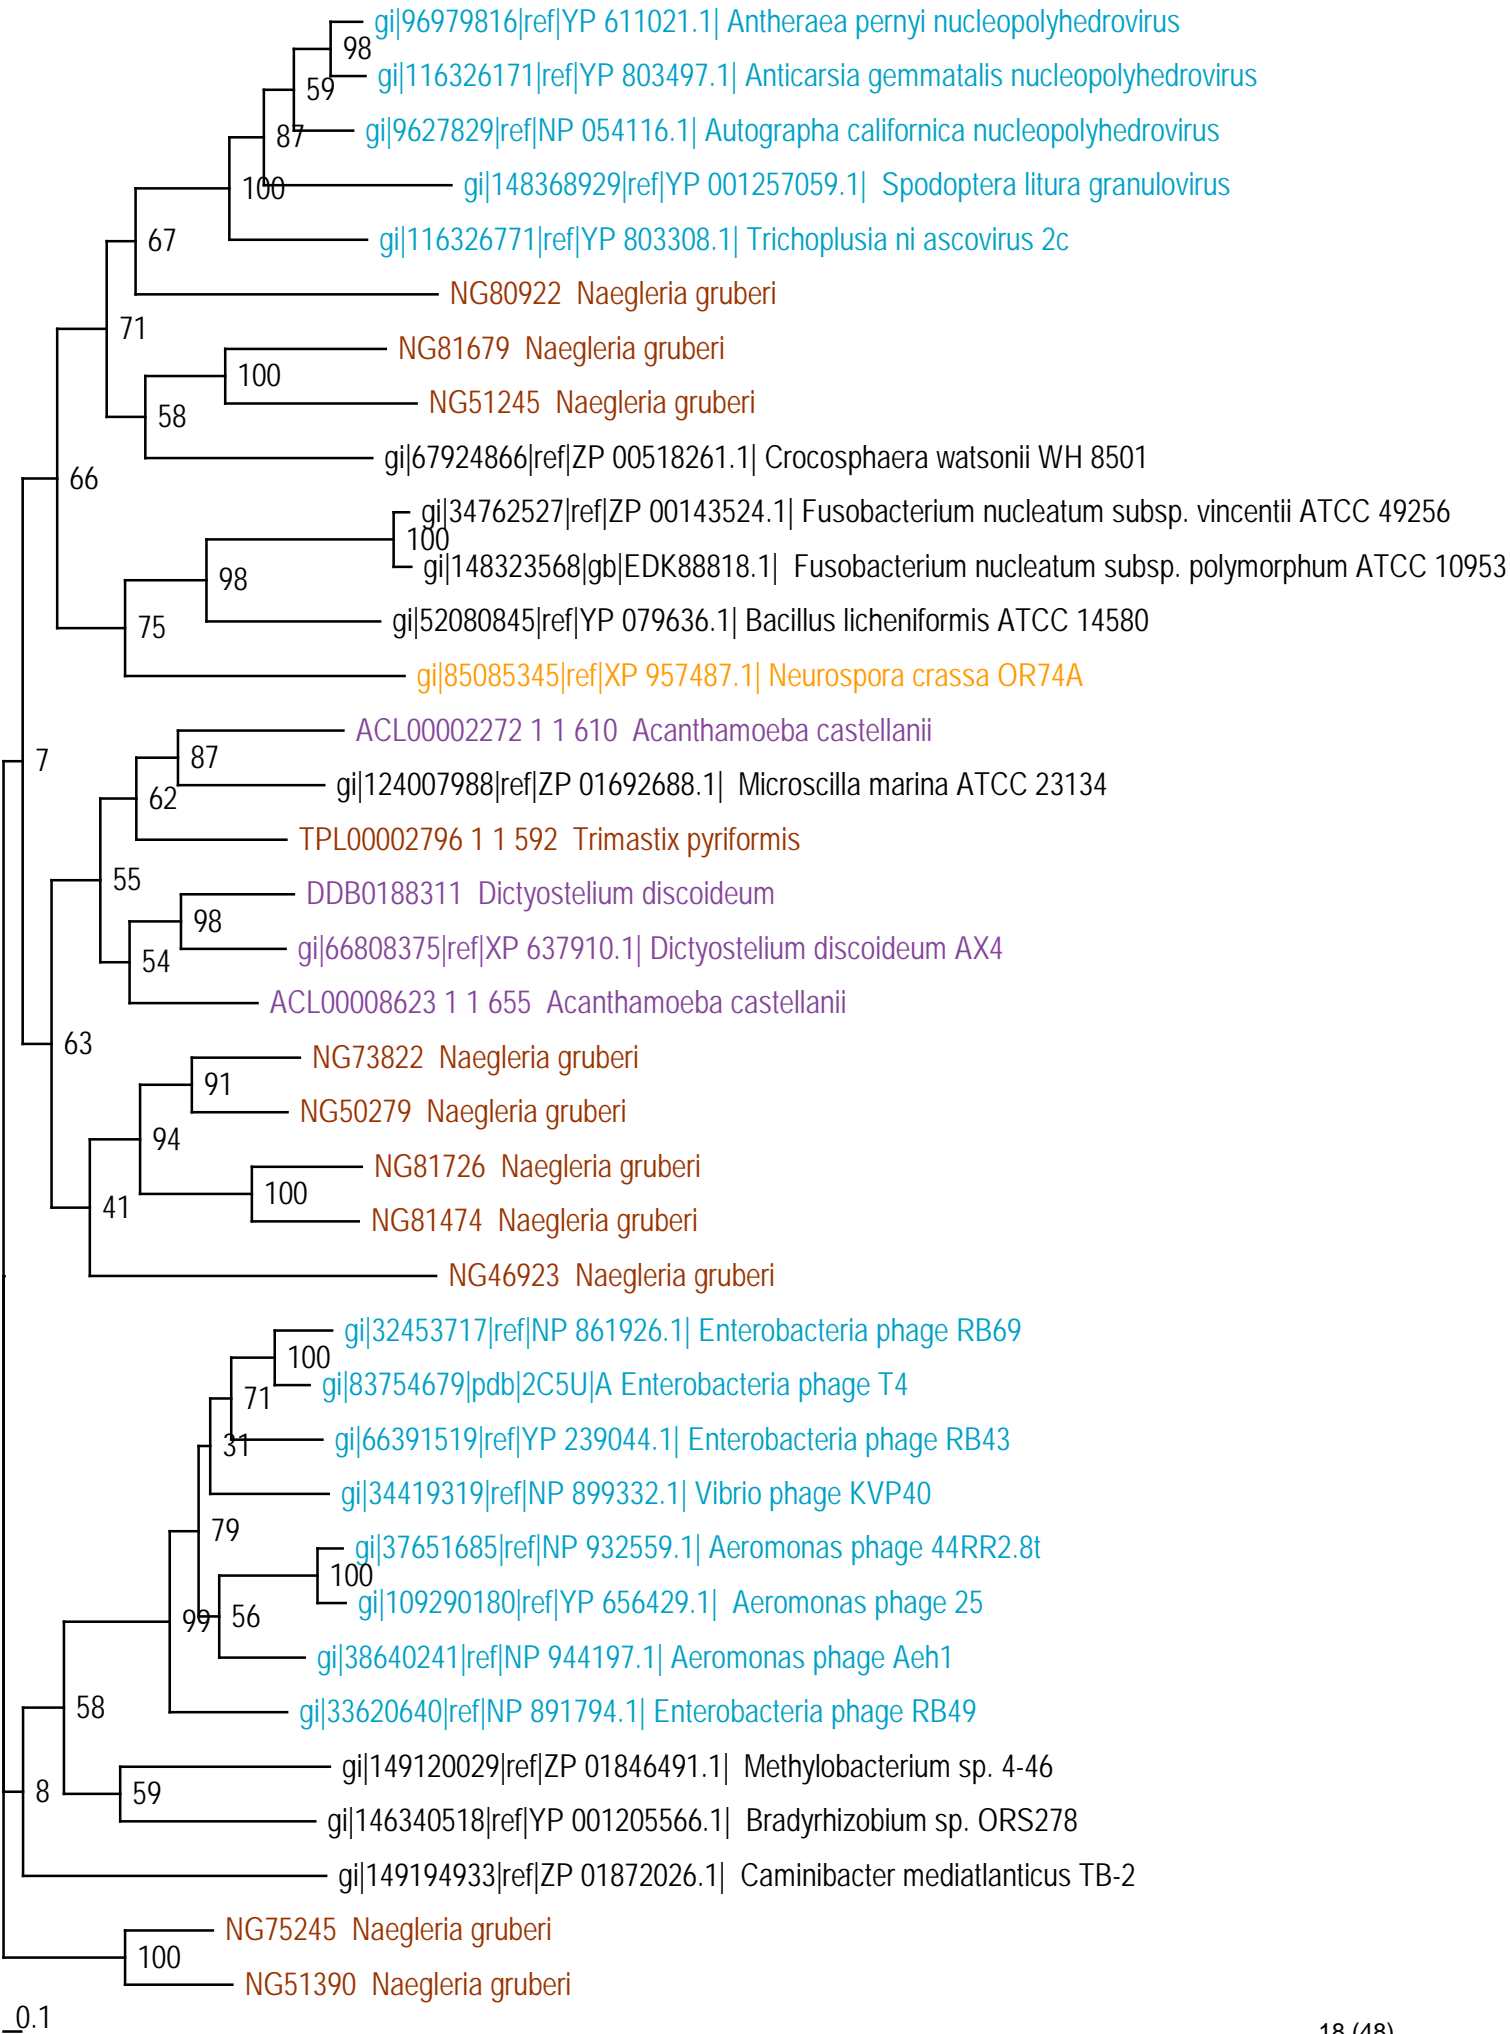

**Figure S1AS**

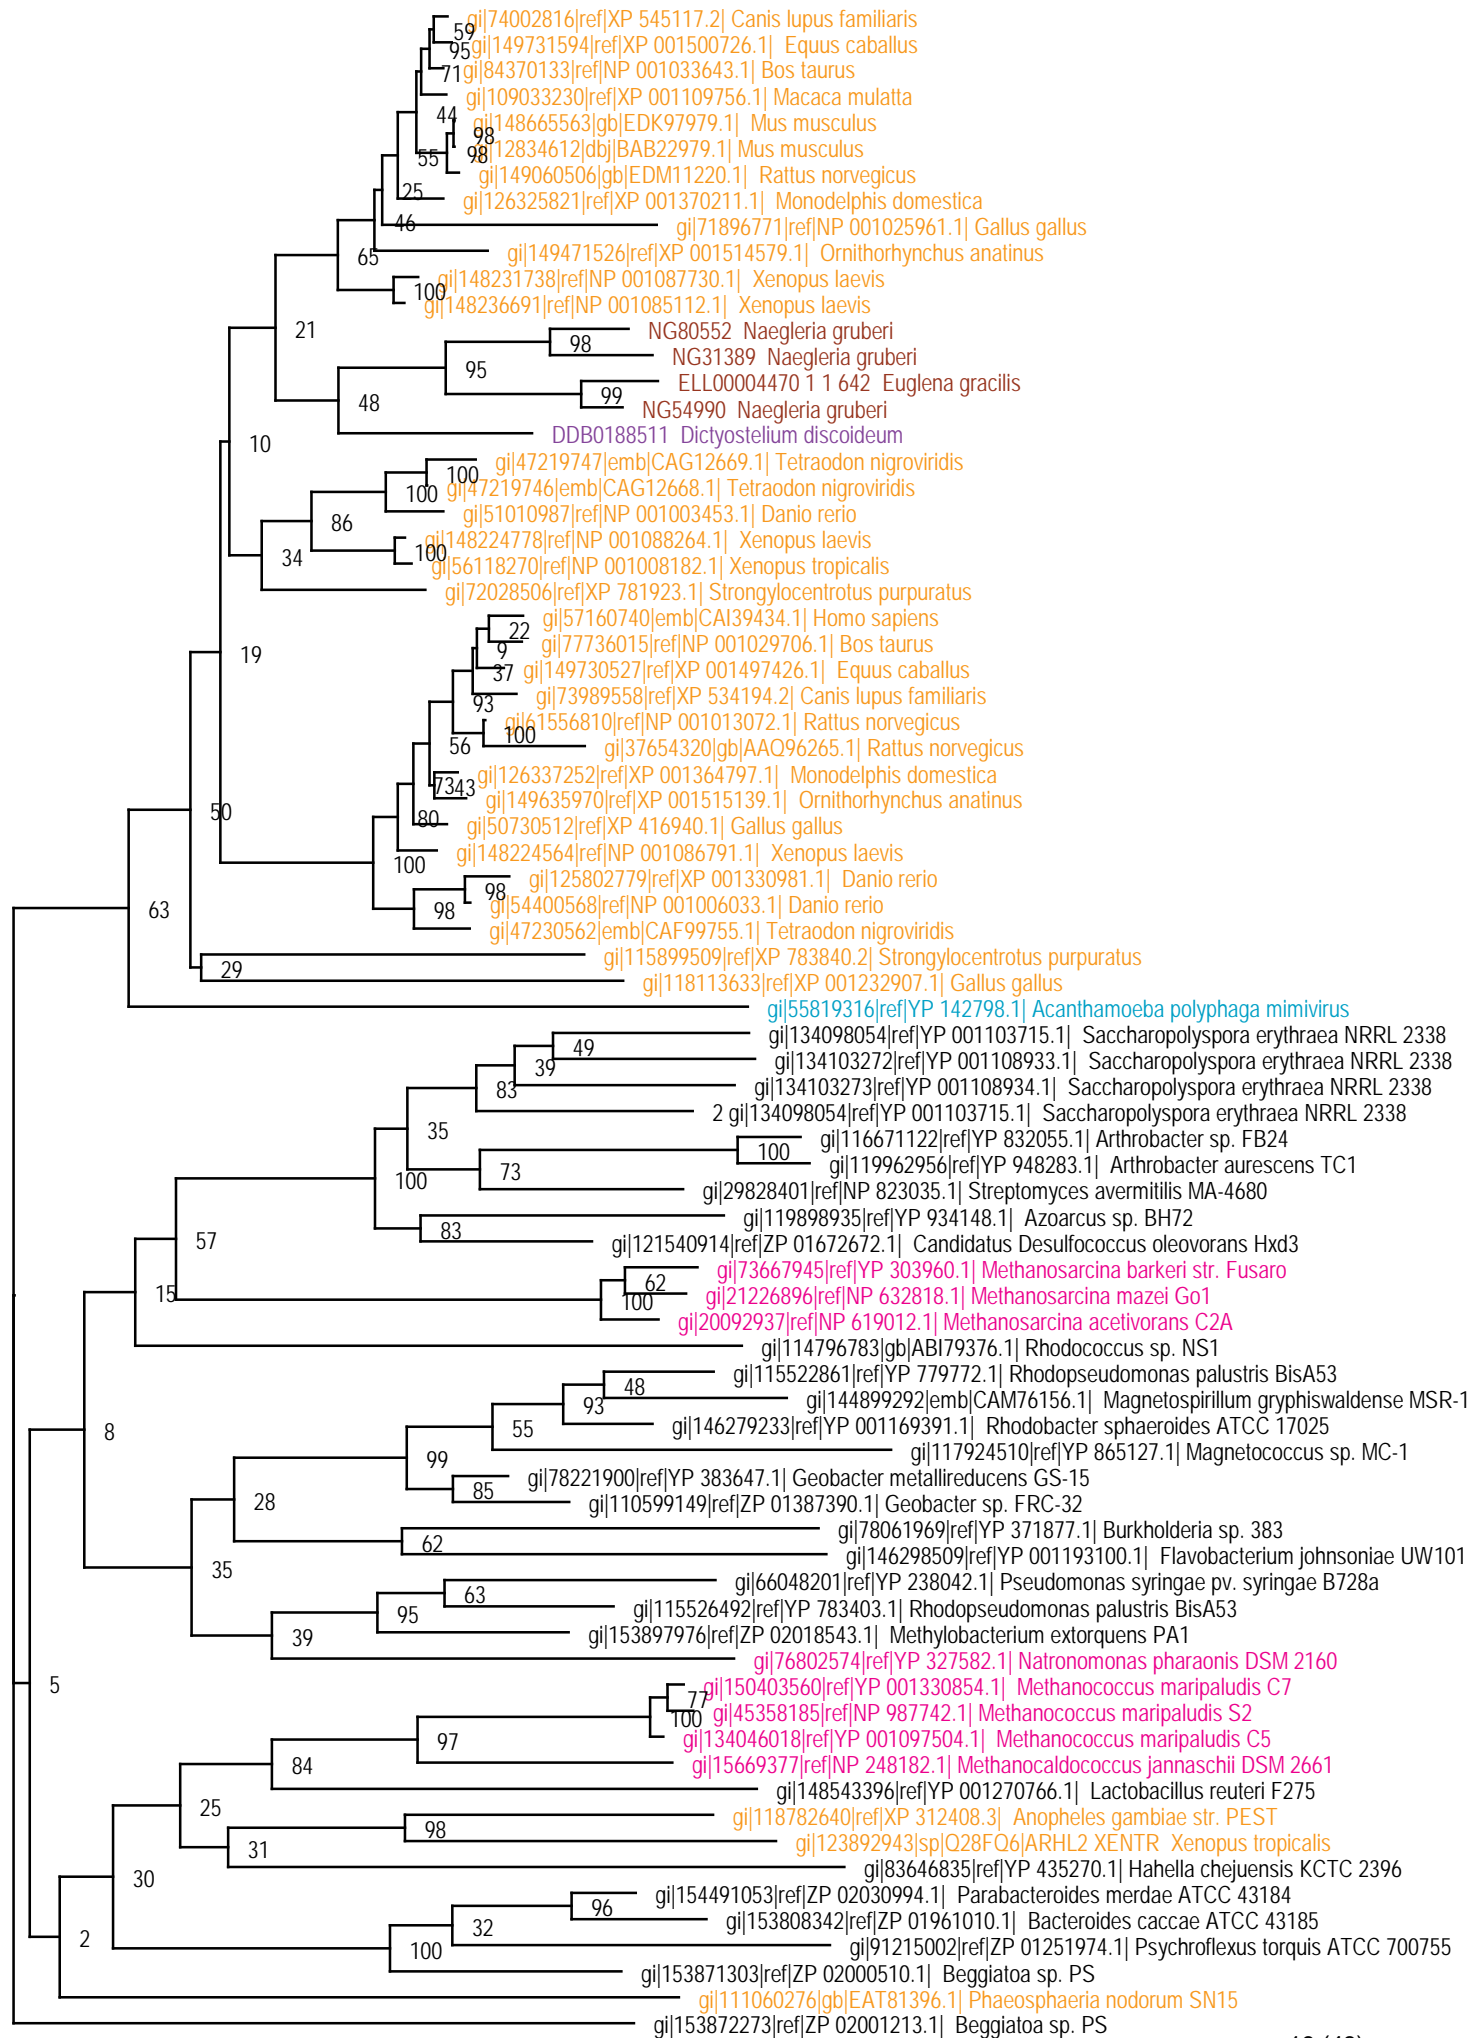

Figure S1AT

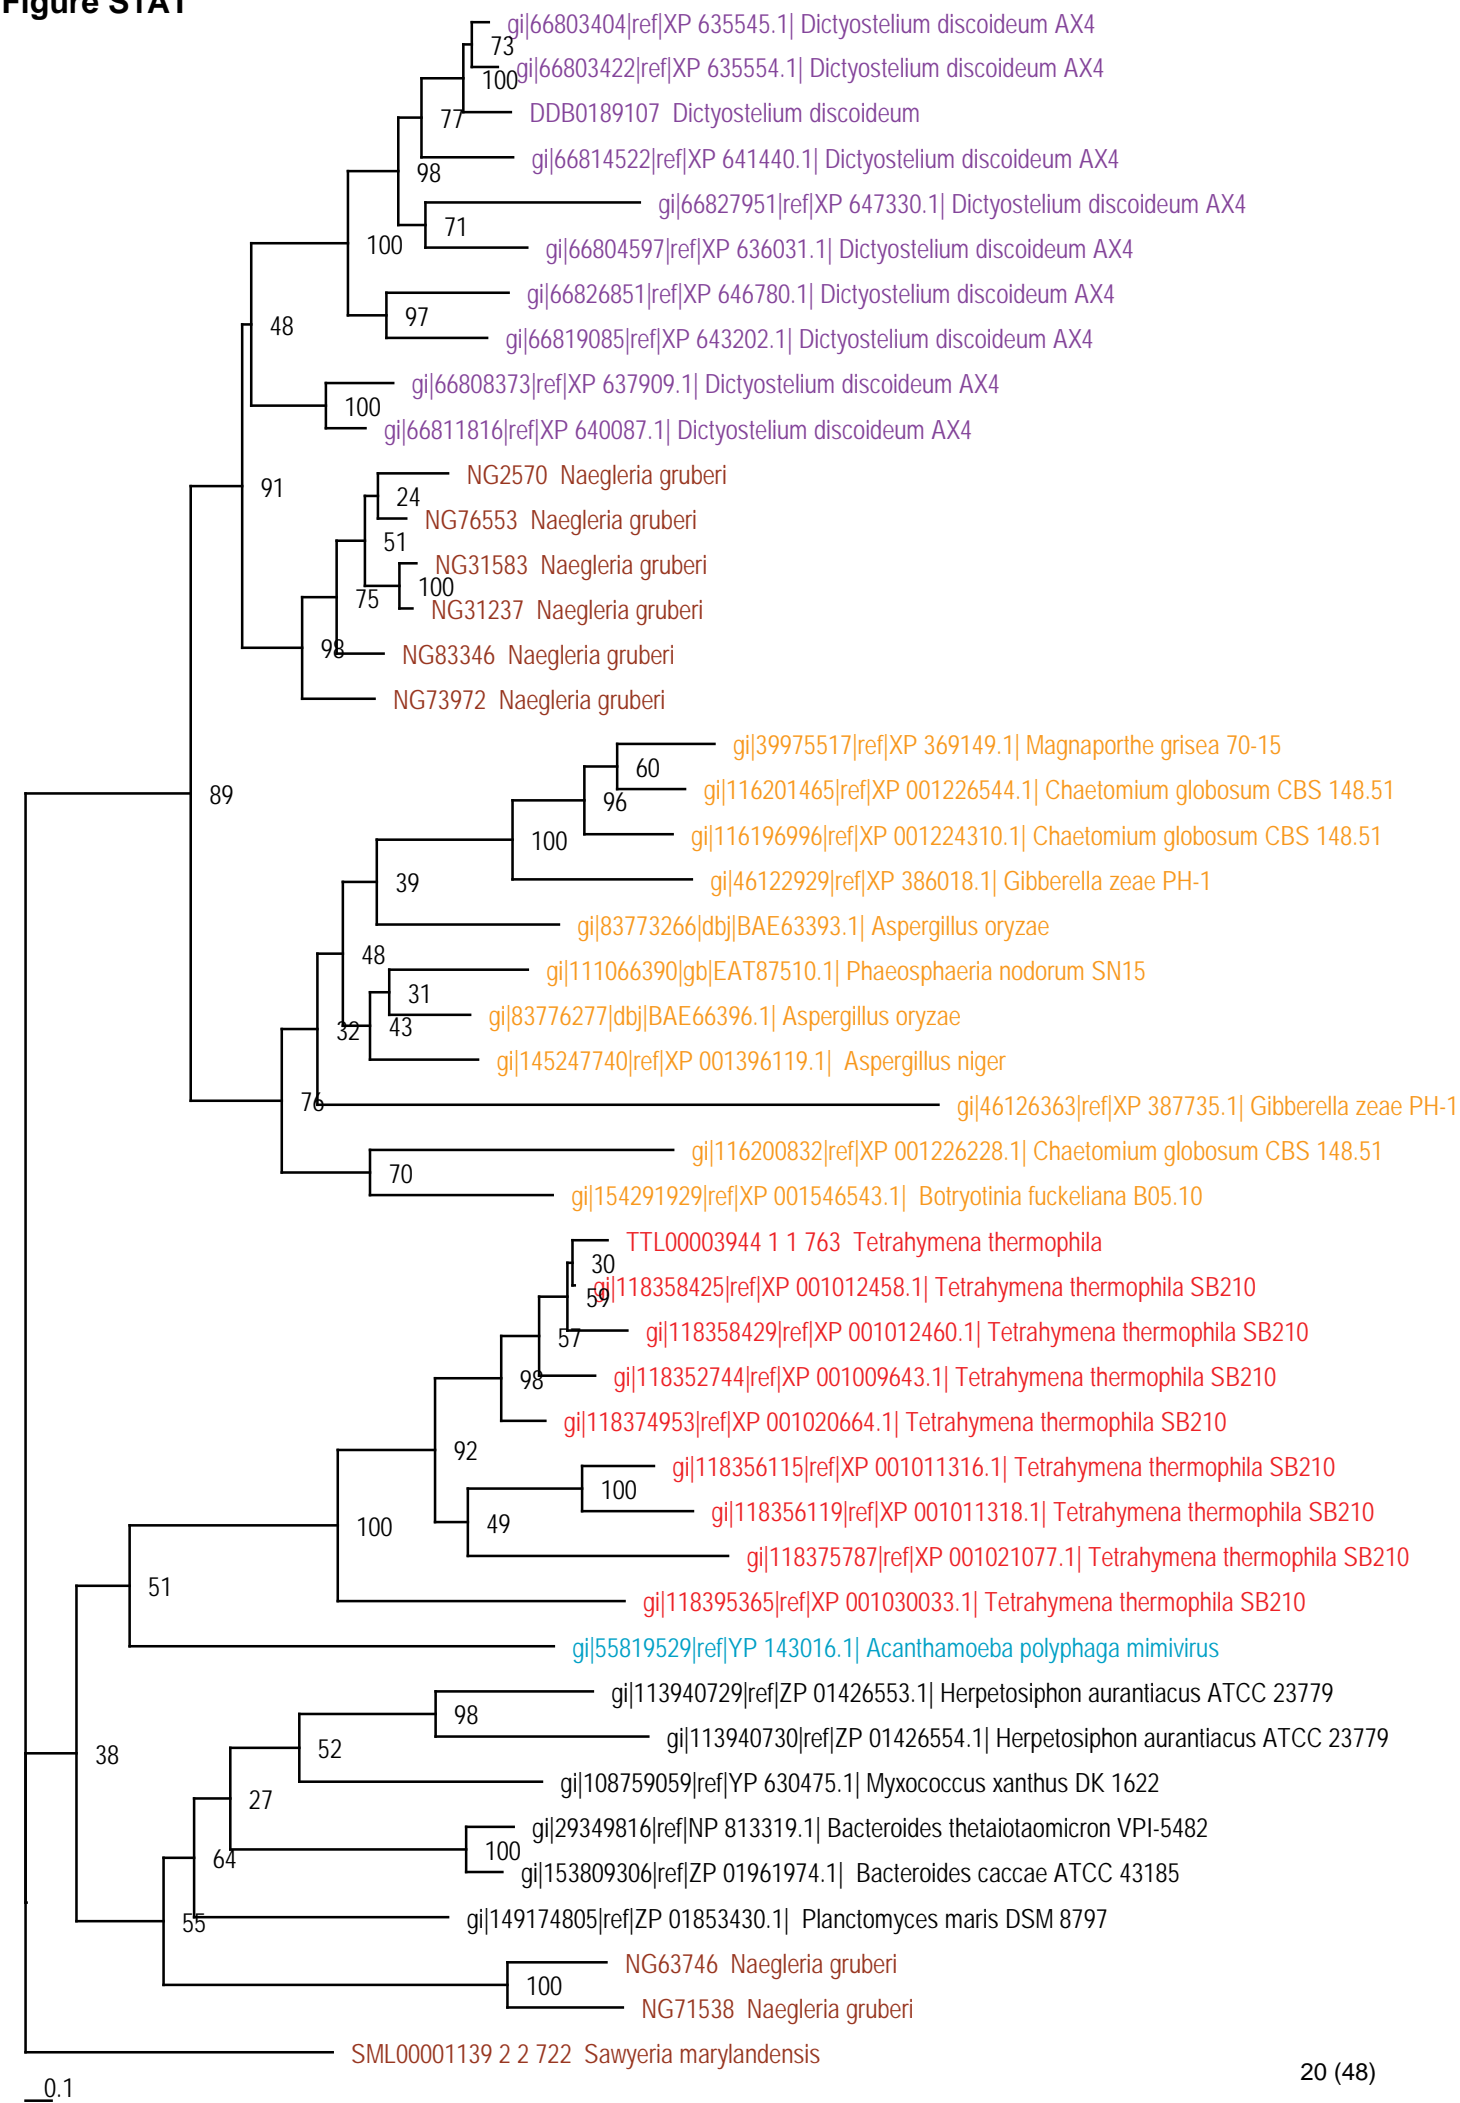

Figure S1AU

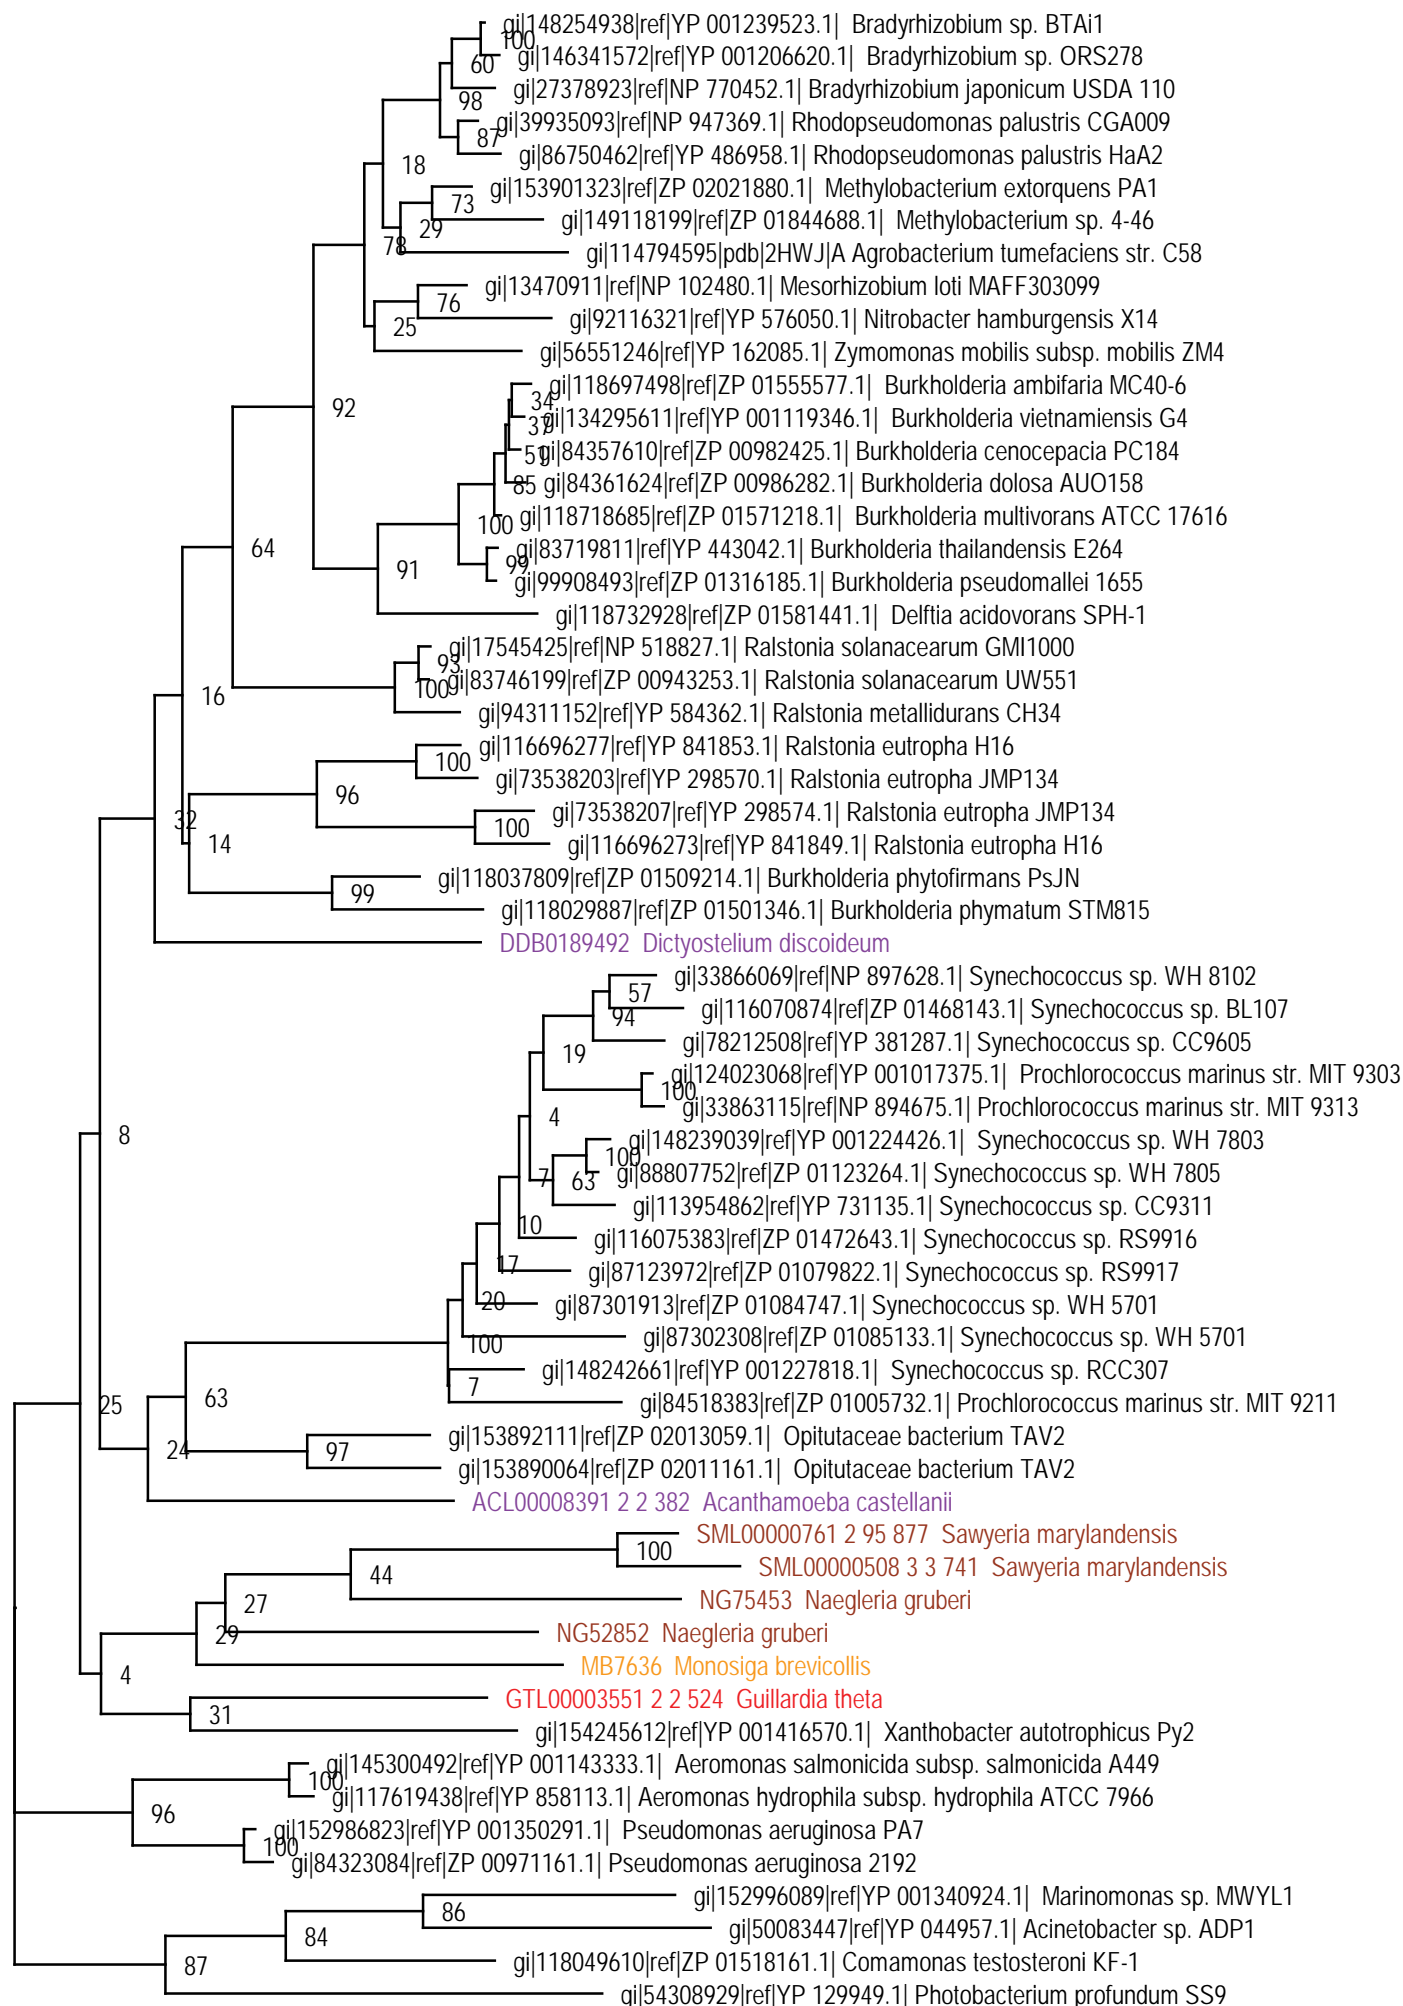

0.1

**Figure S1AV**

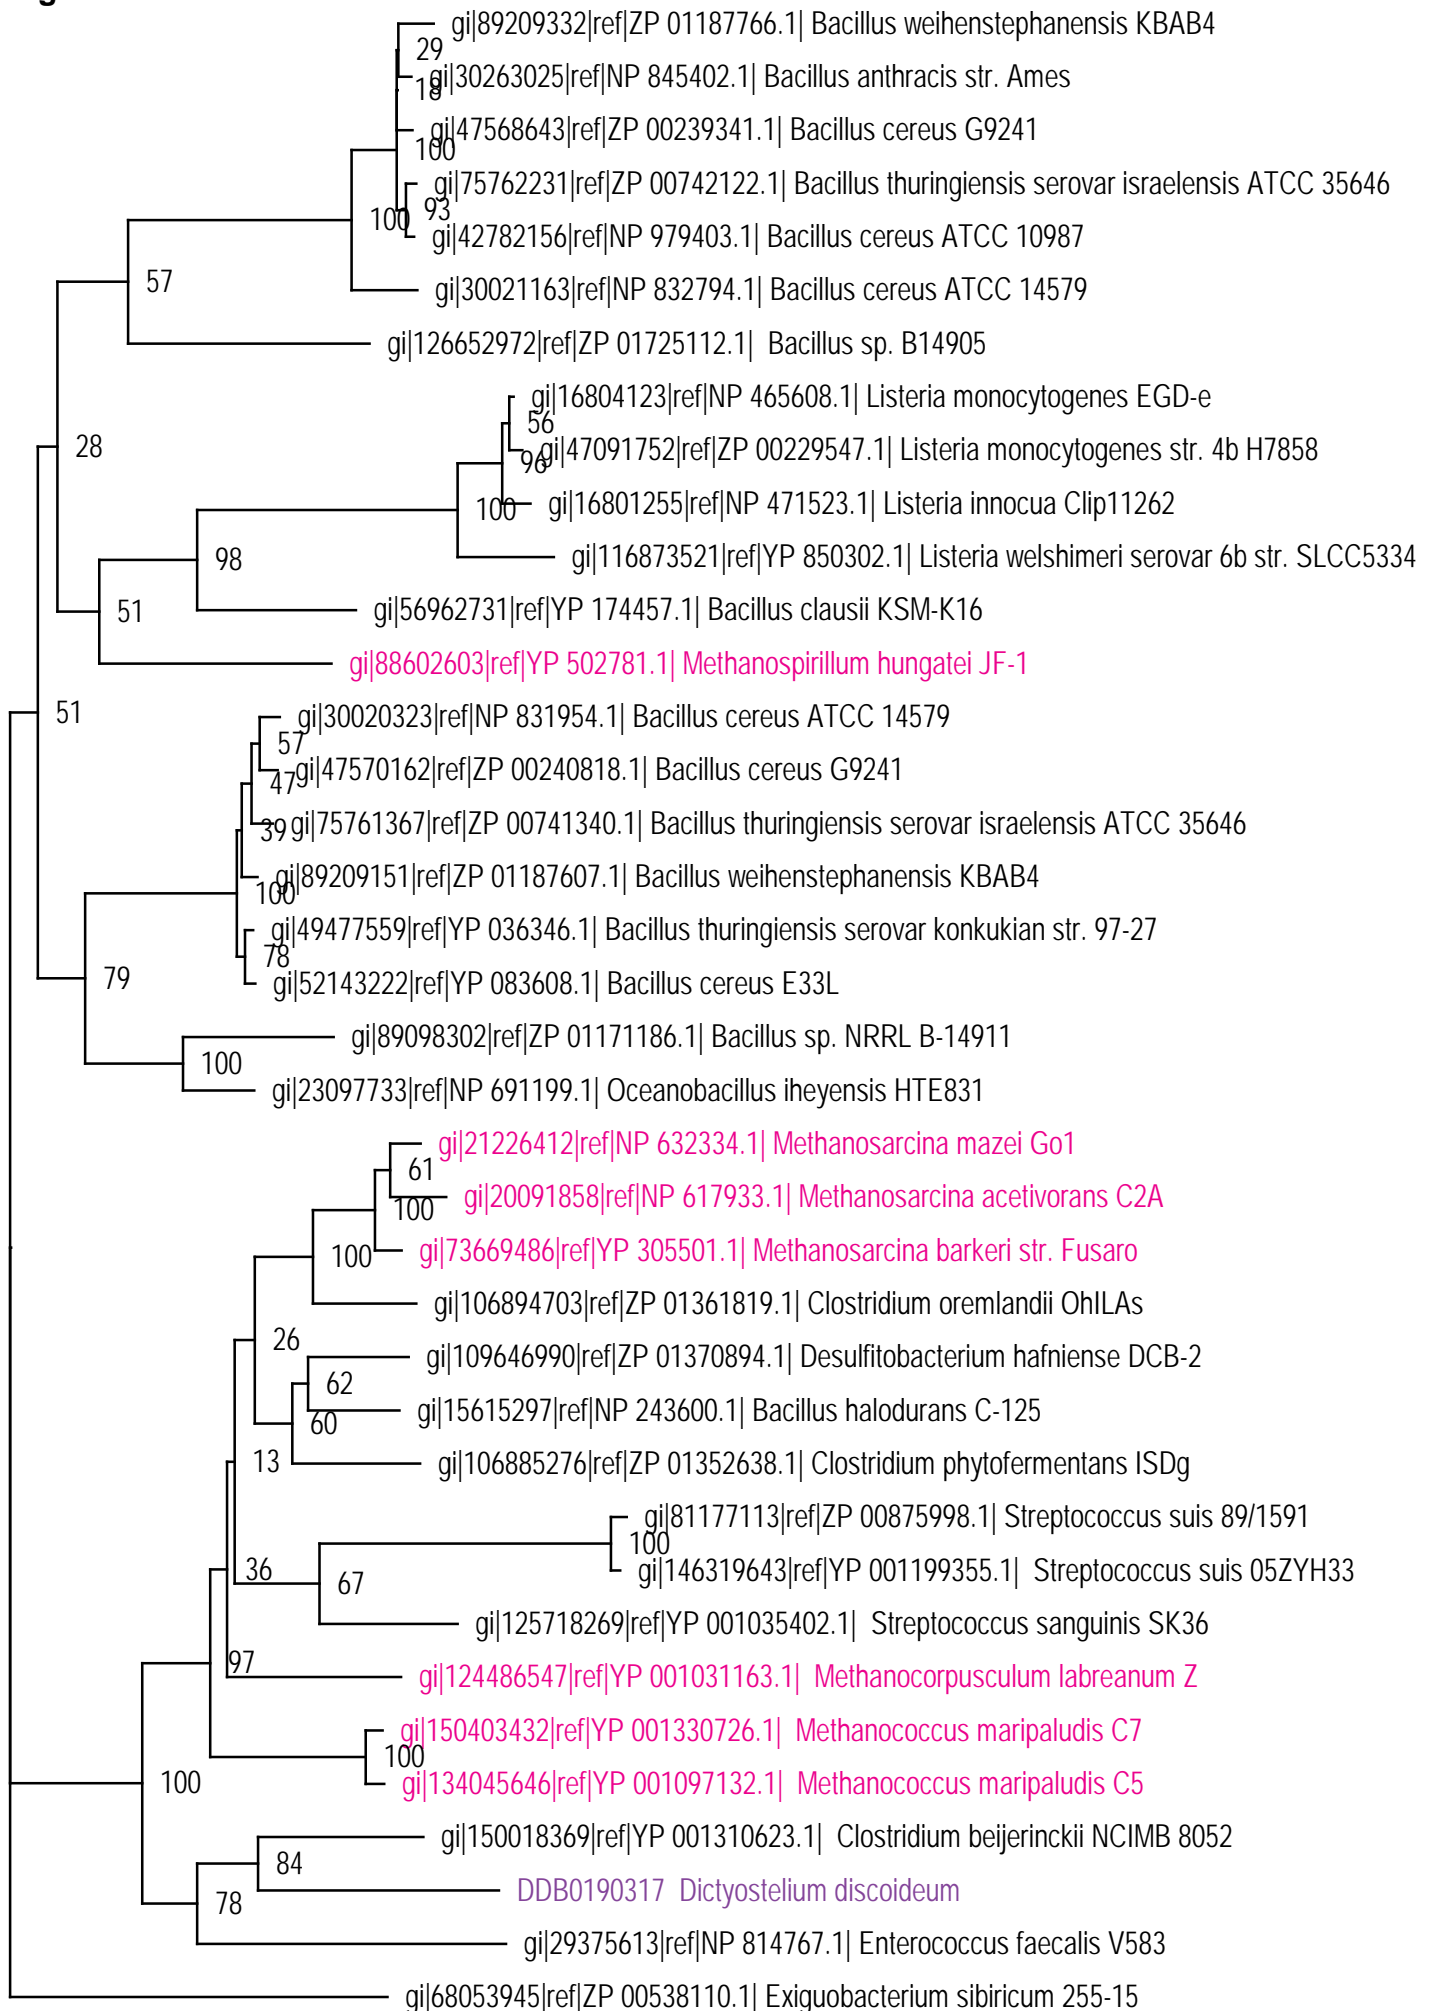



Figure S1AW

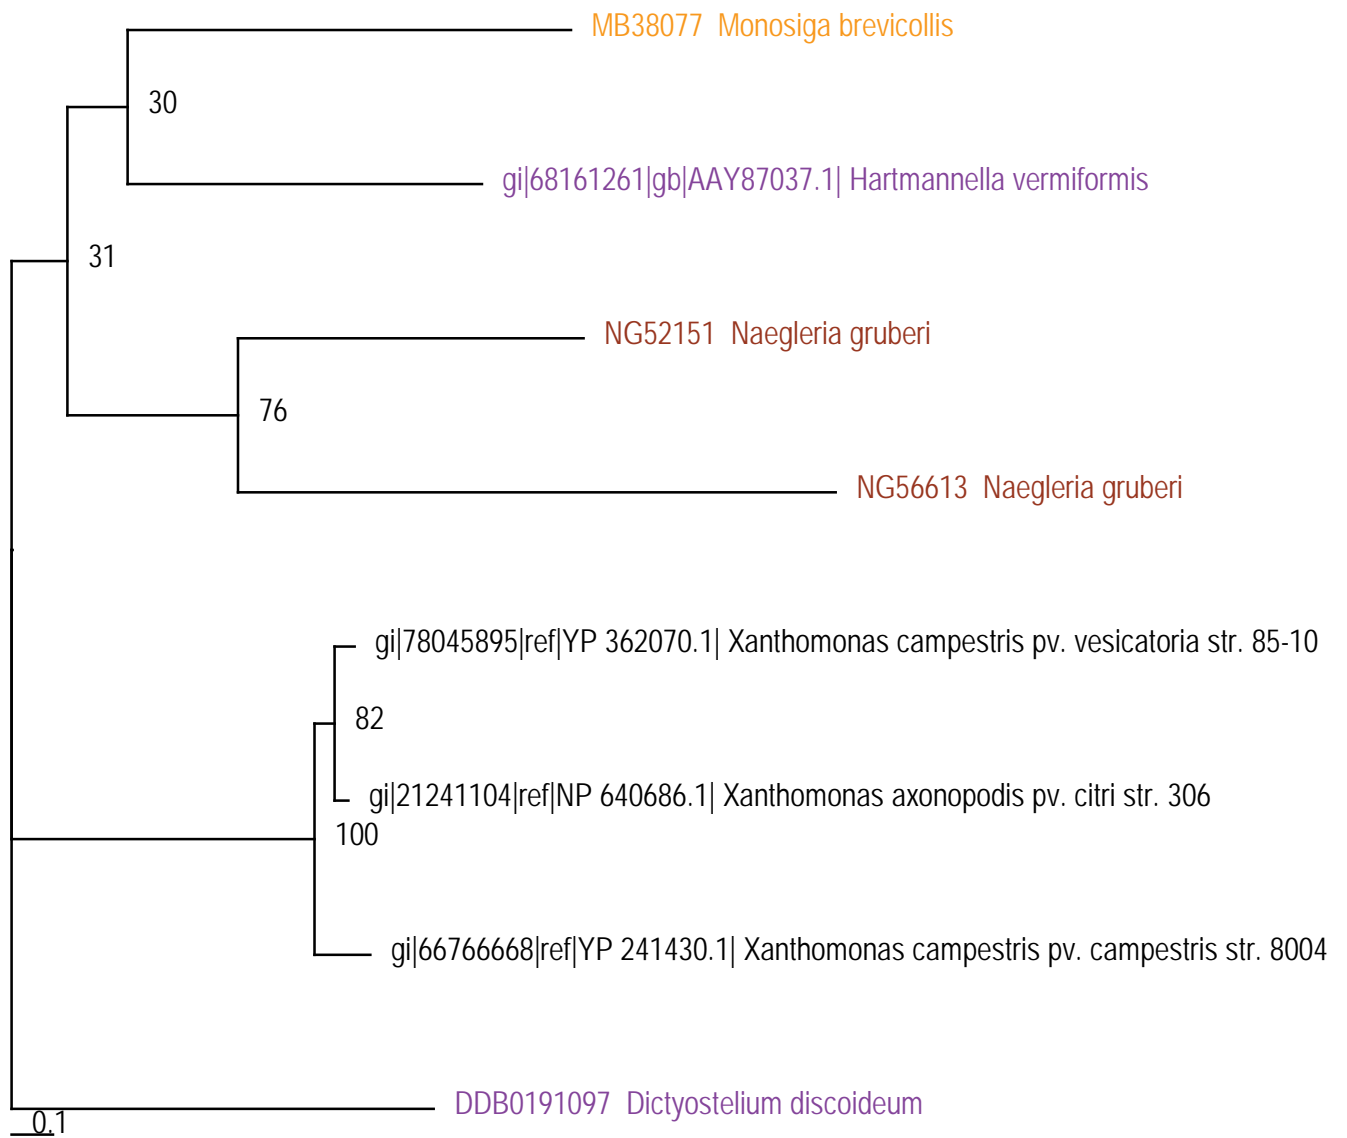

Figure S1AX

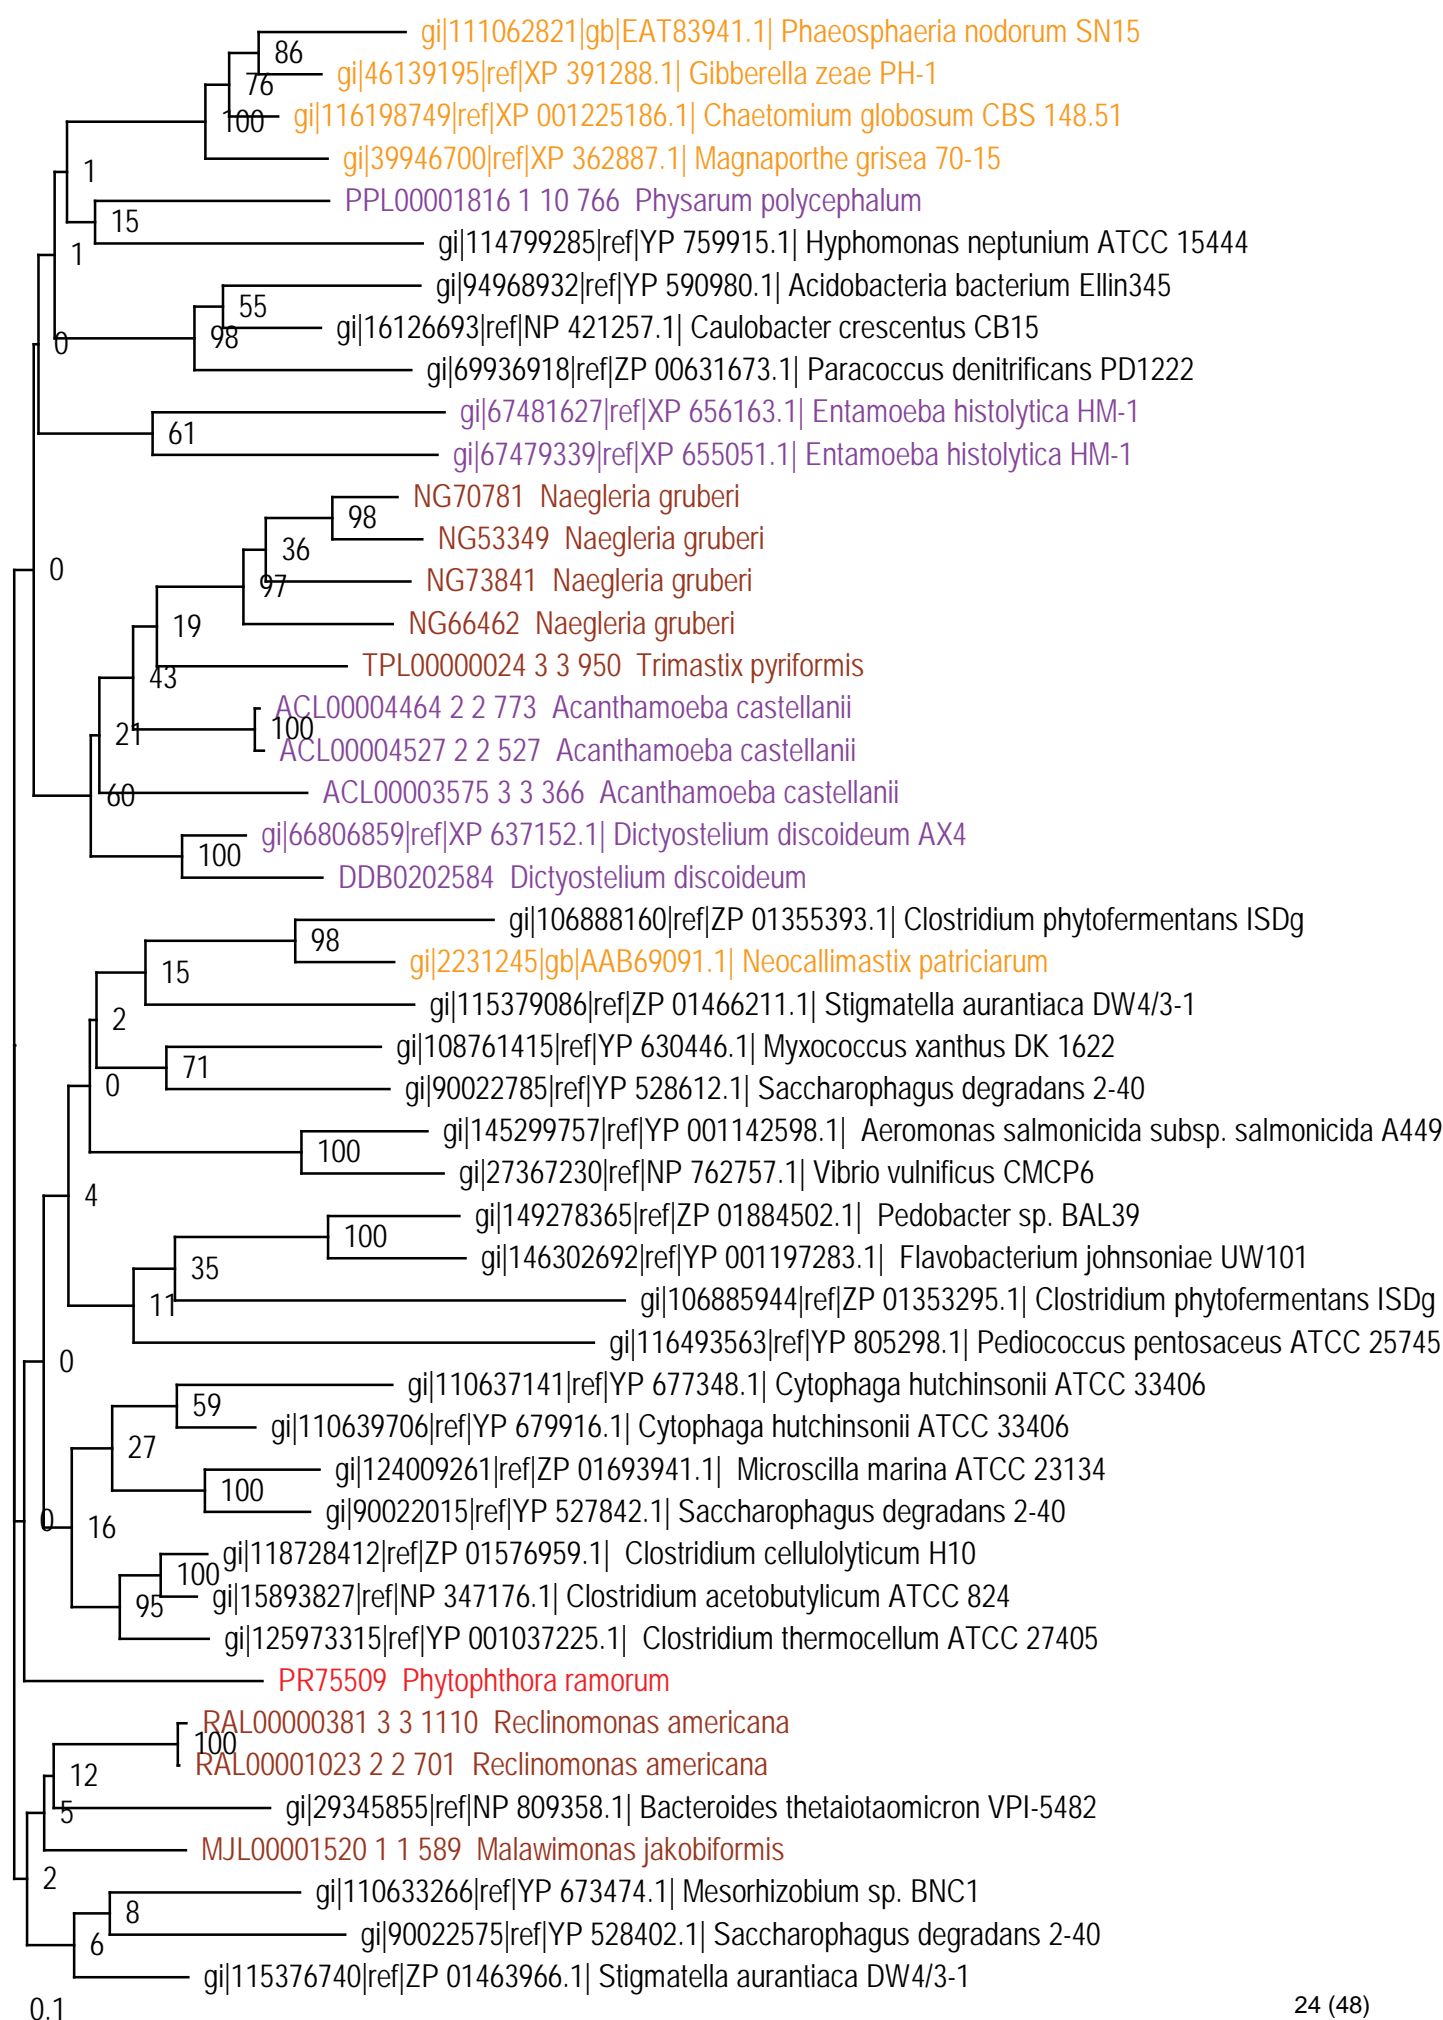



Figure S1AY

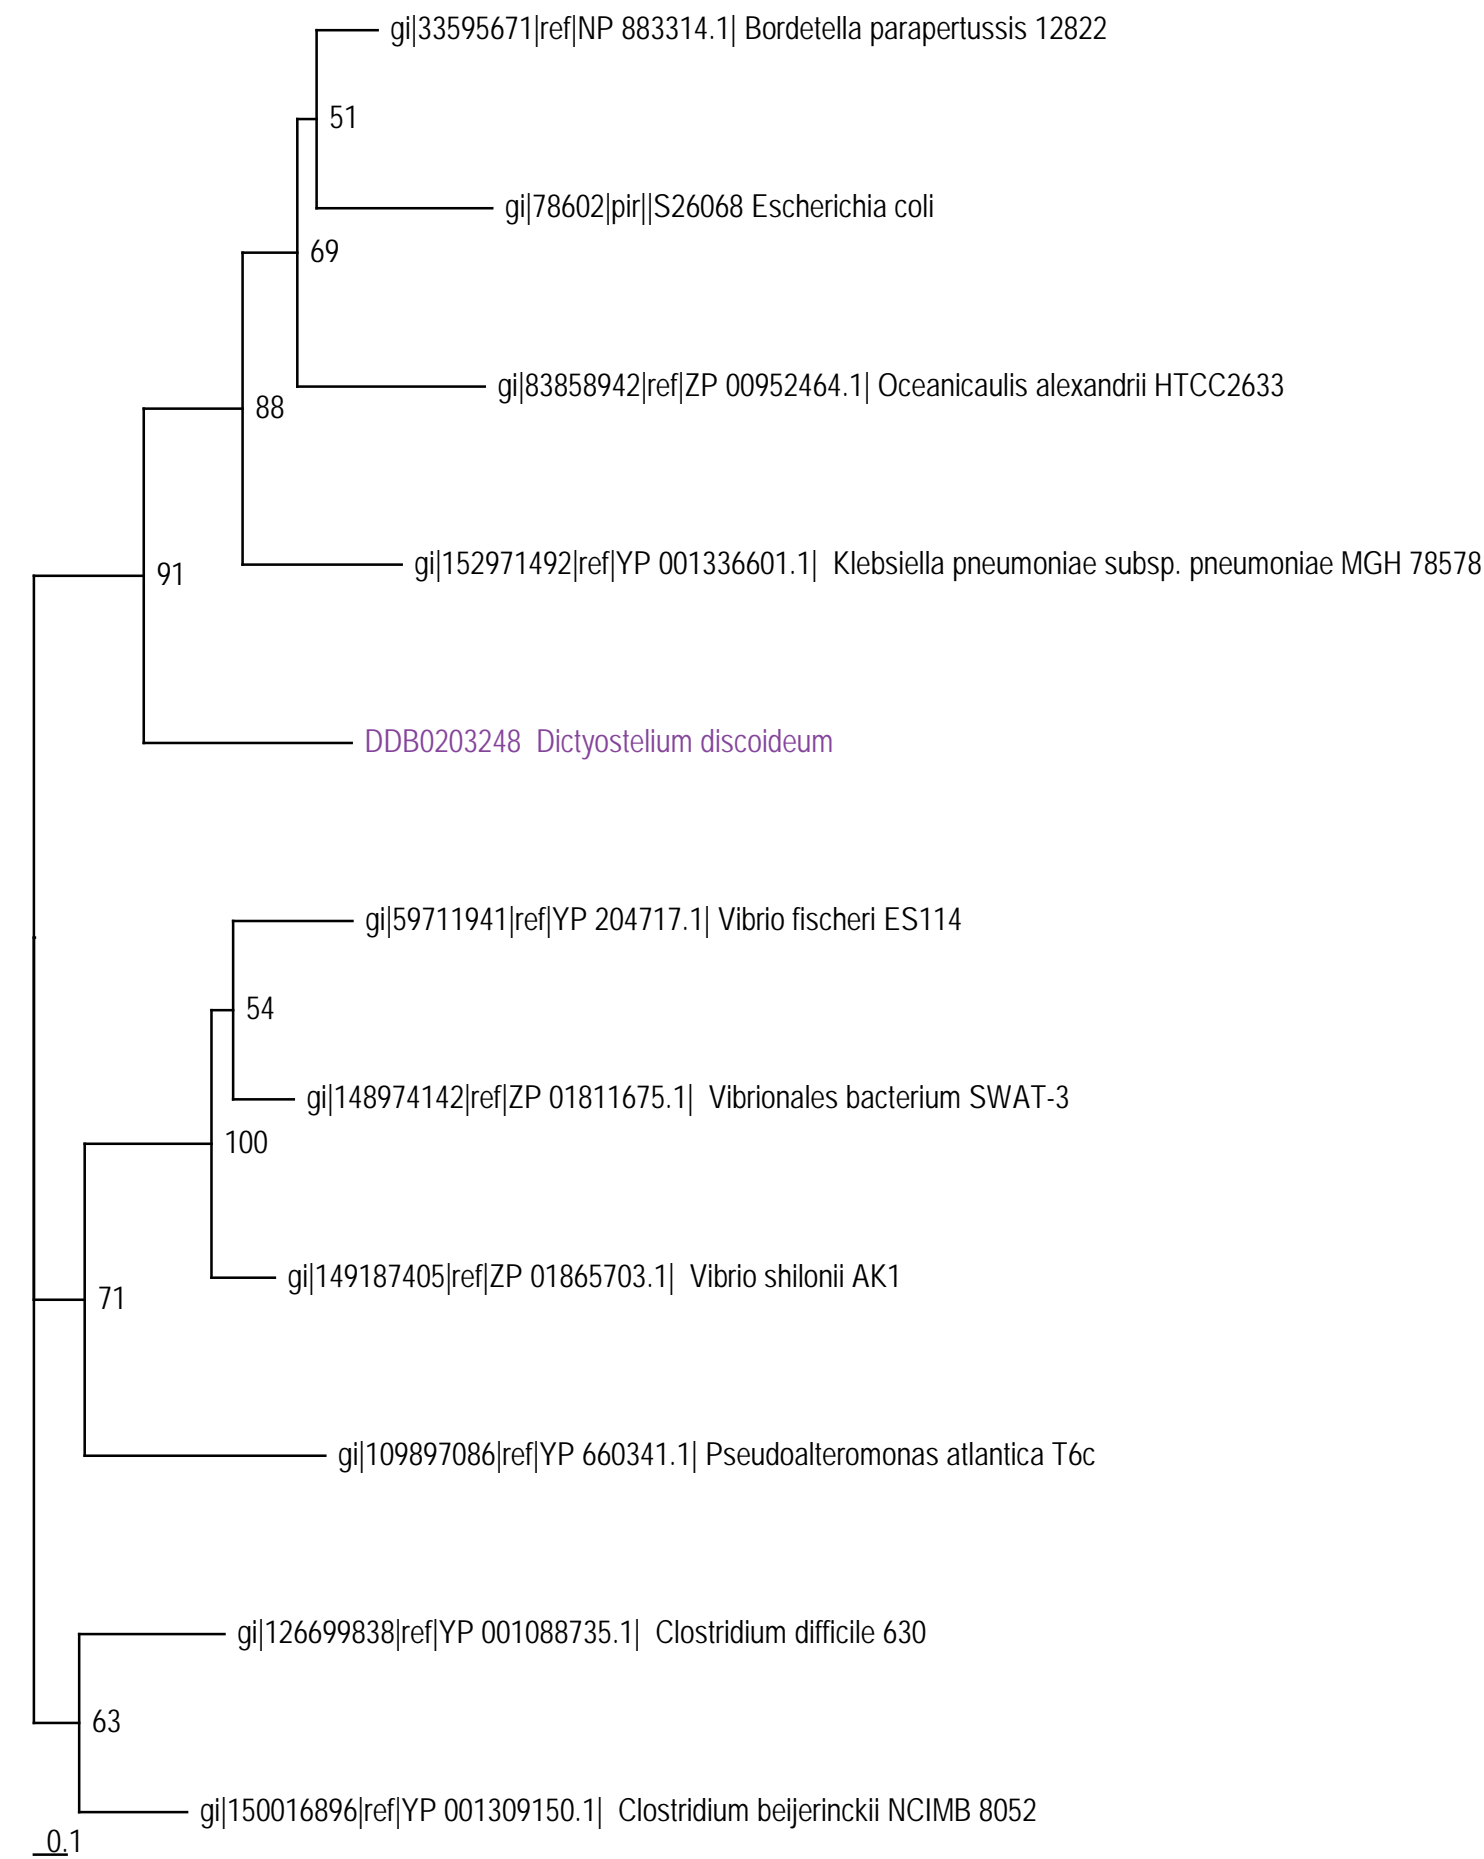

Figure S1AZ

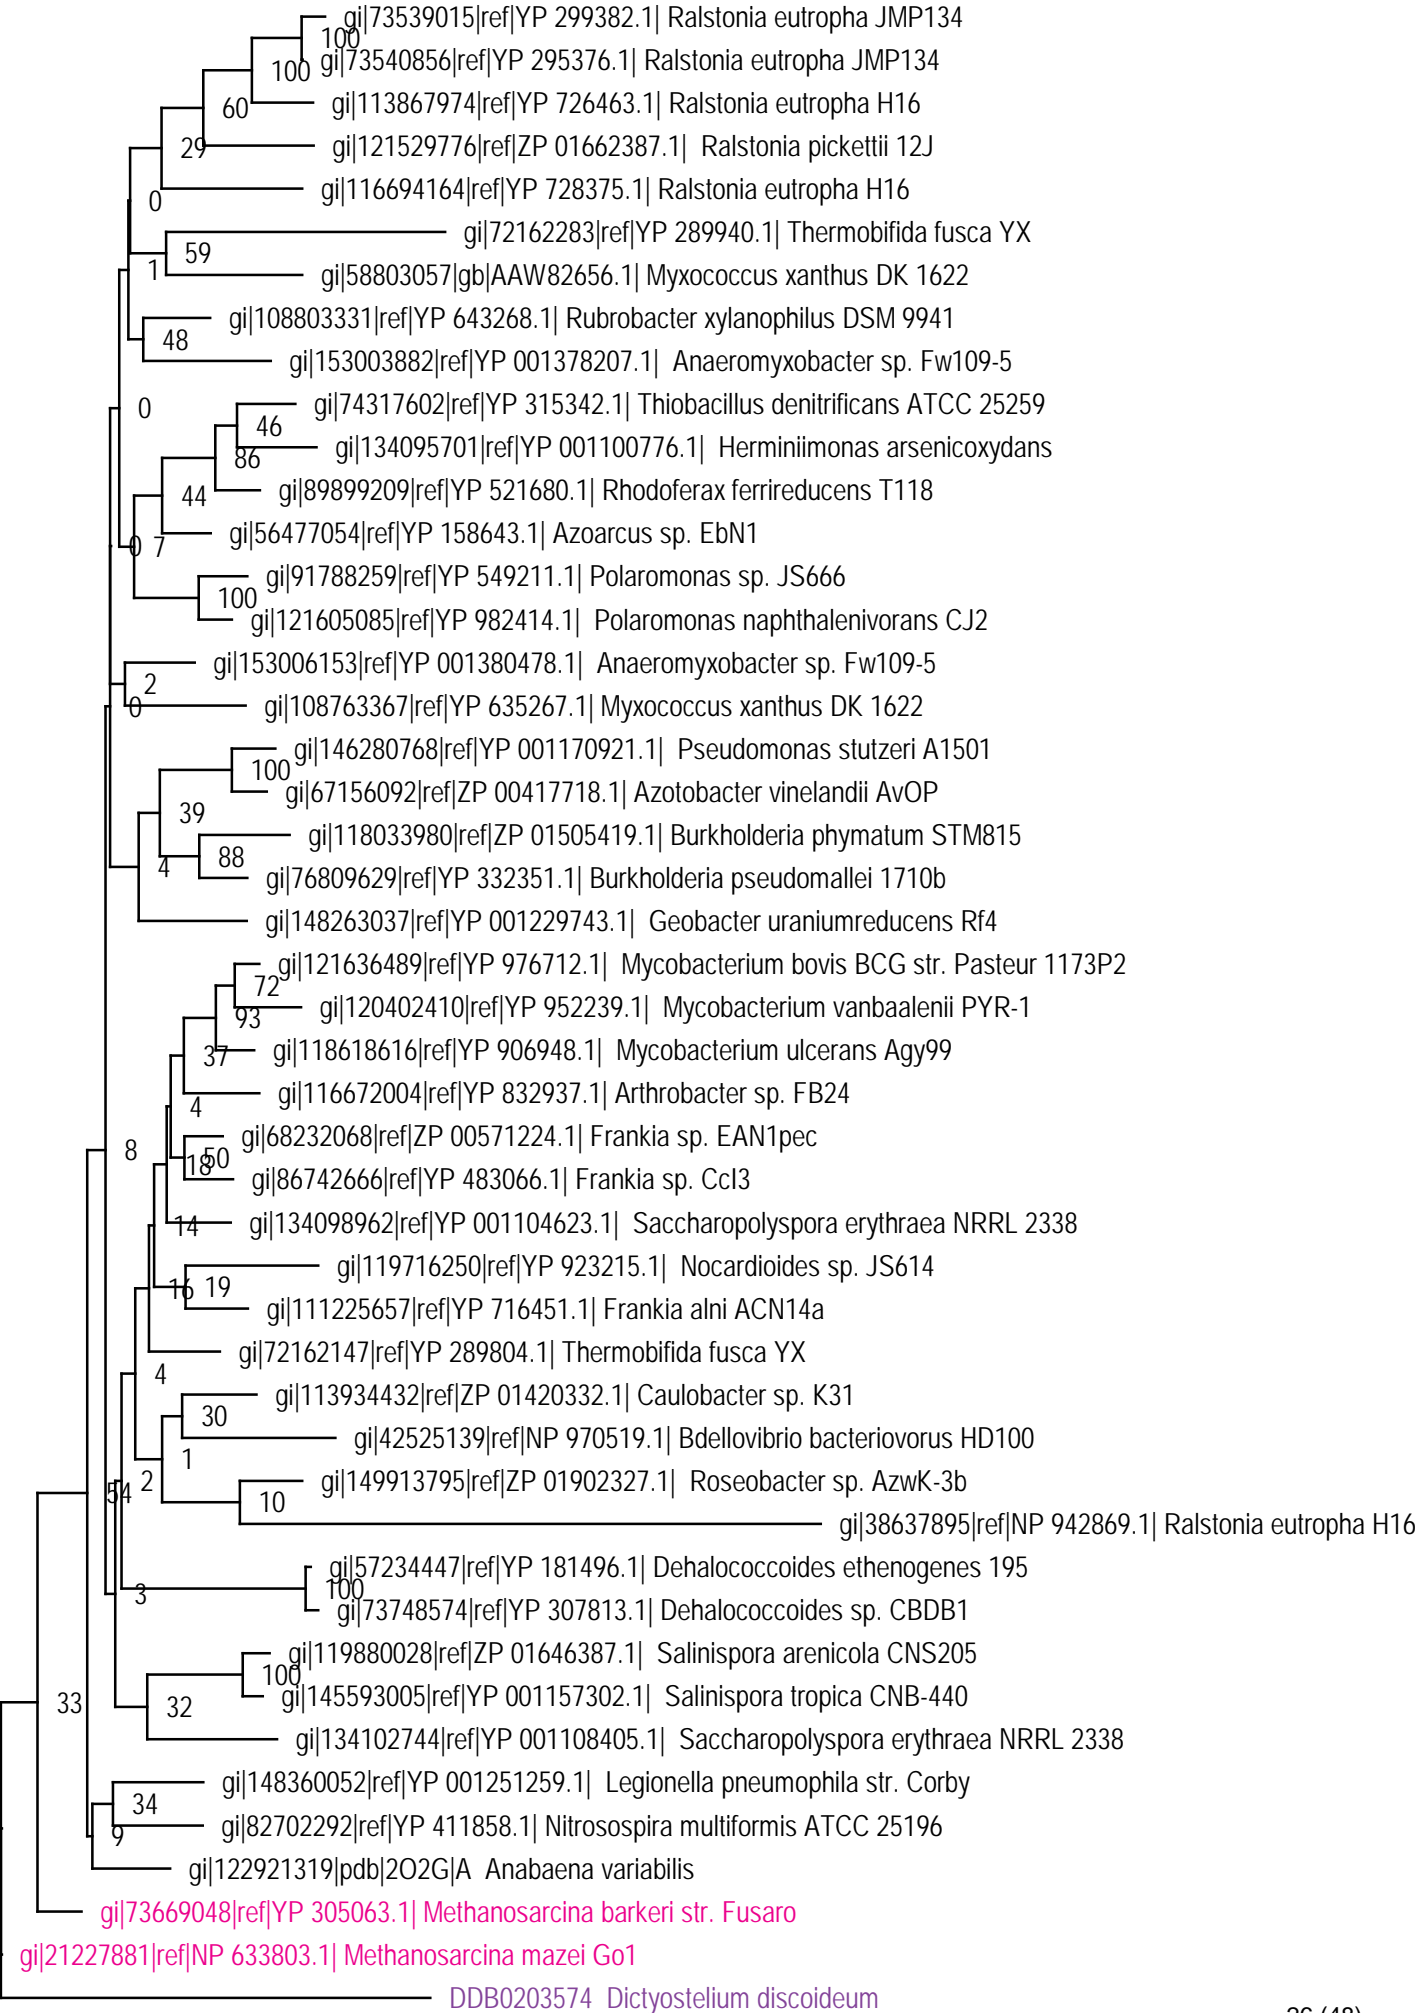

Figure S1BA

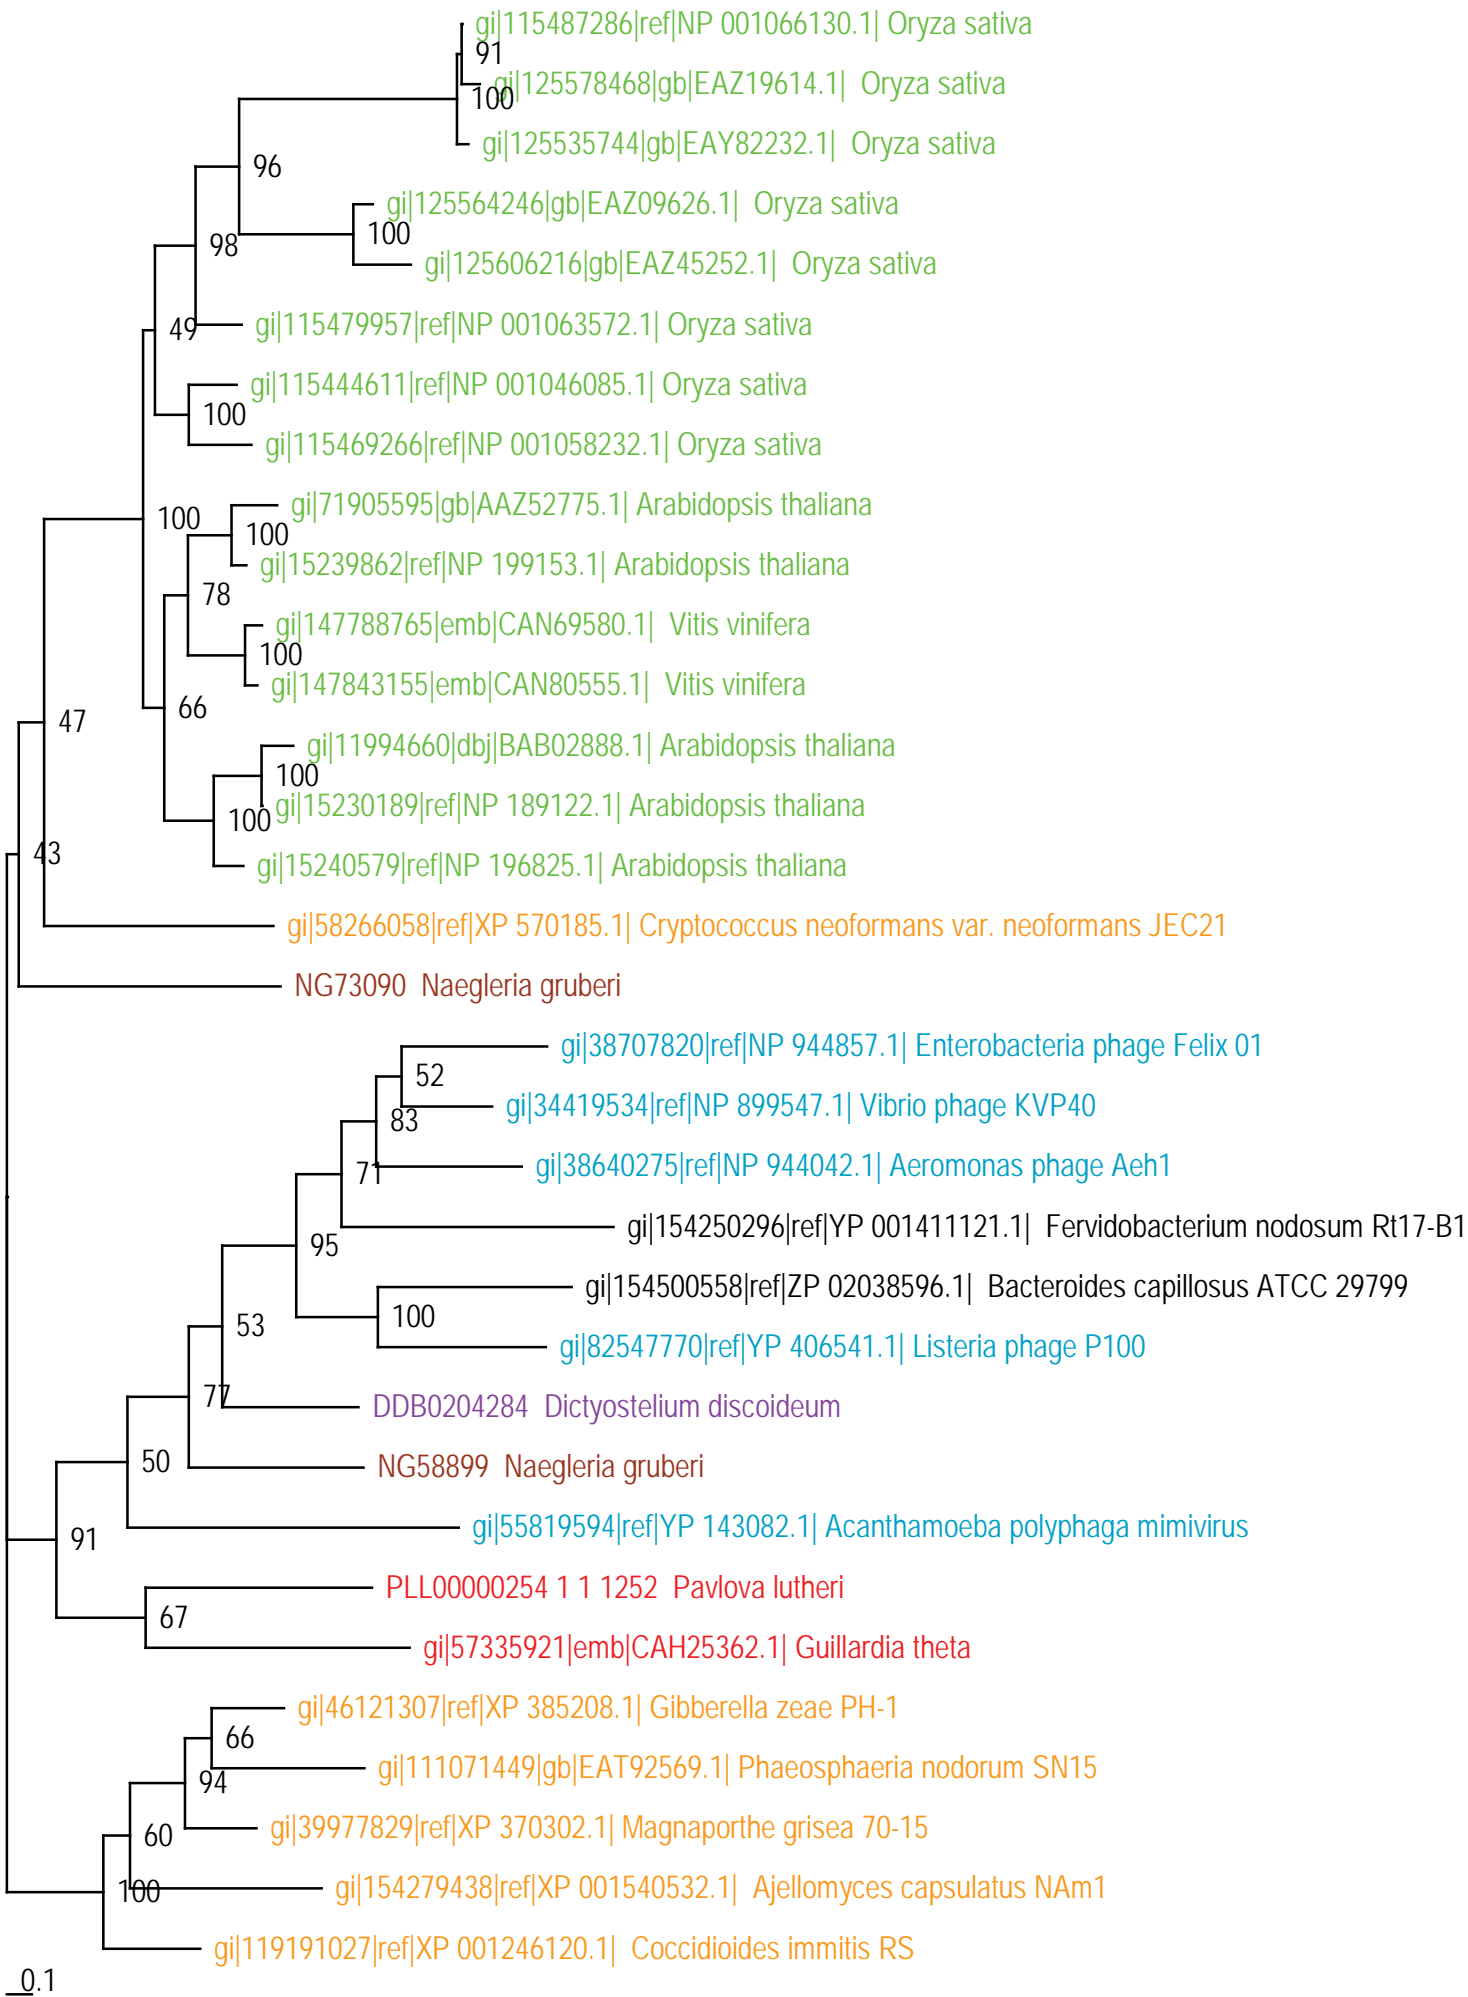

0.1

Figure S1BB

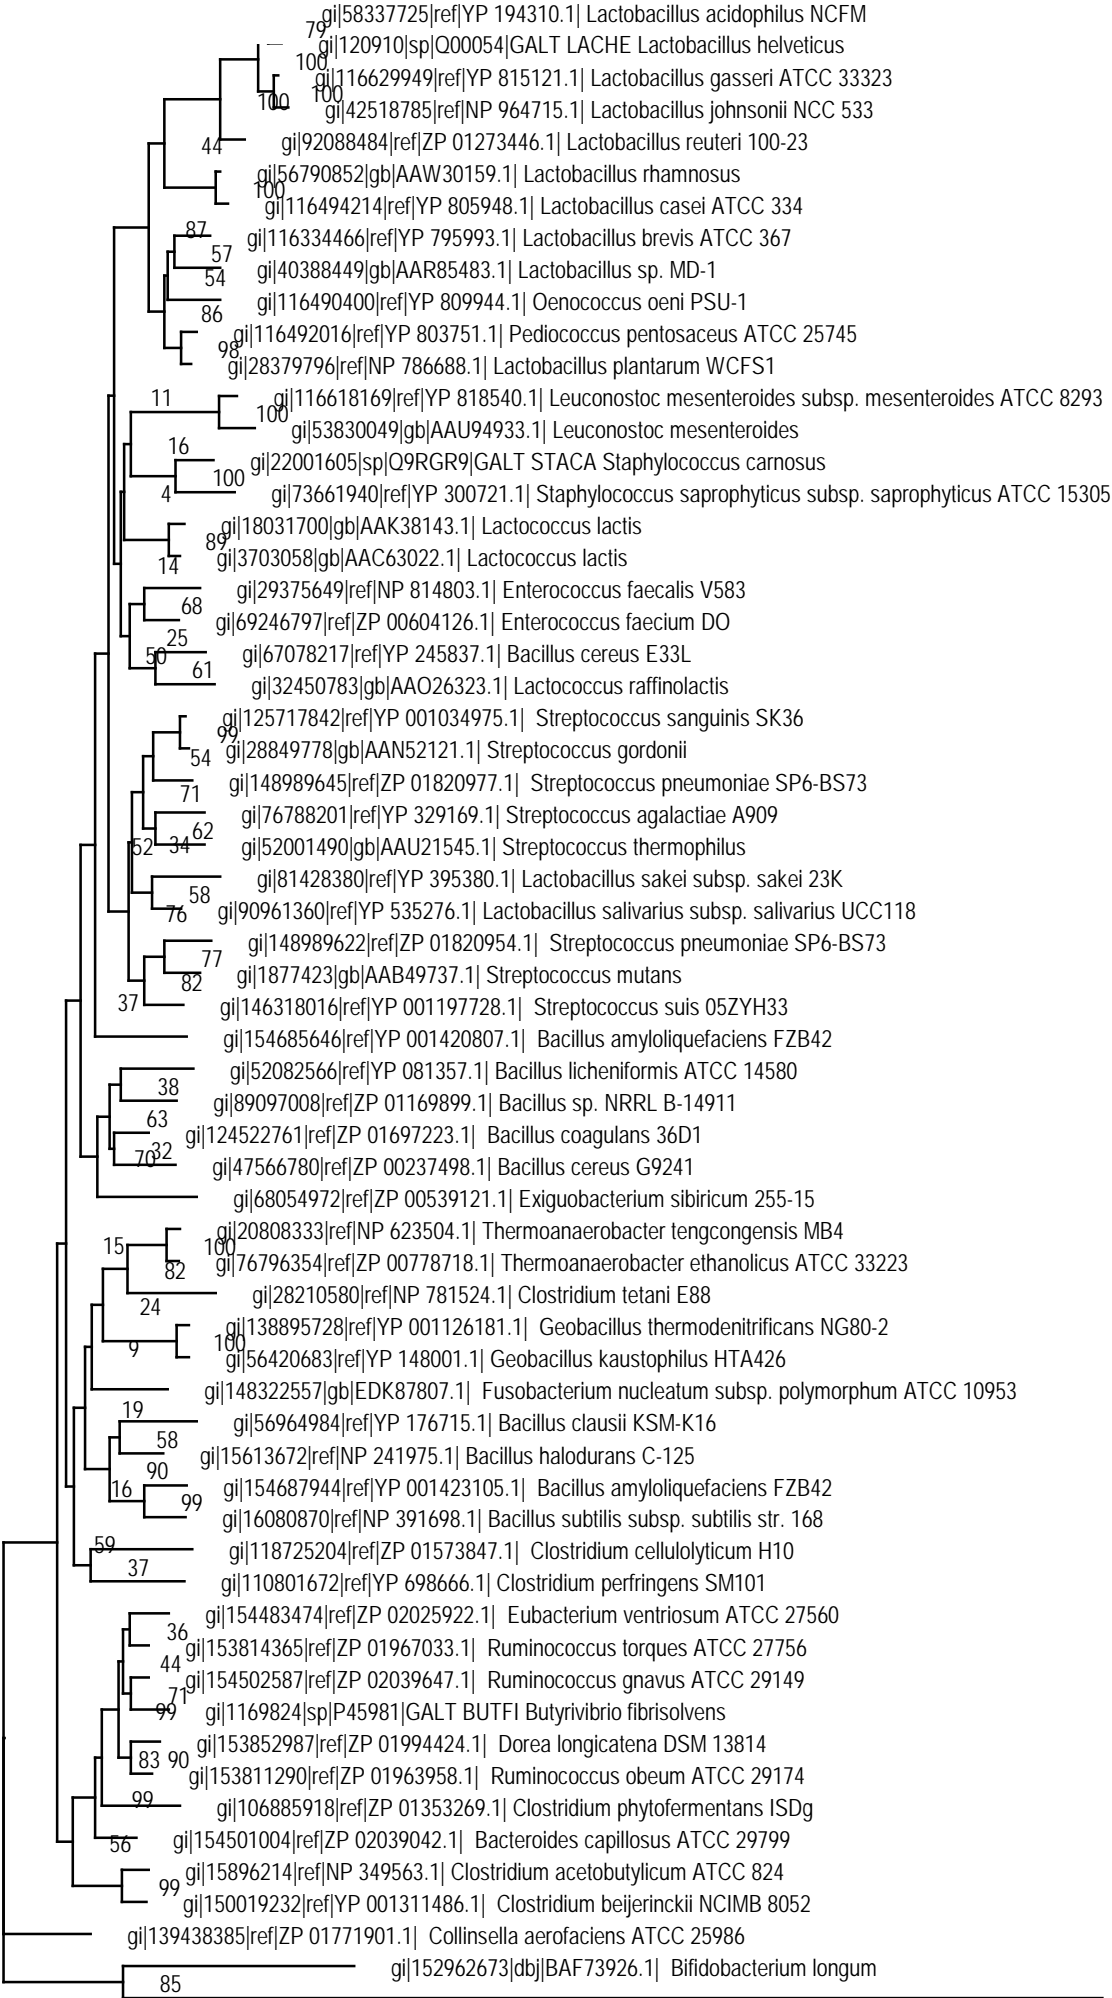

DDB0204814 *Dictyostelium discoideum*

**Figure S1BC**

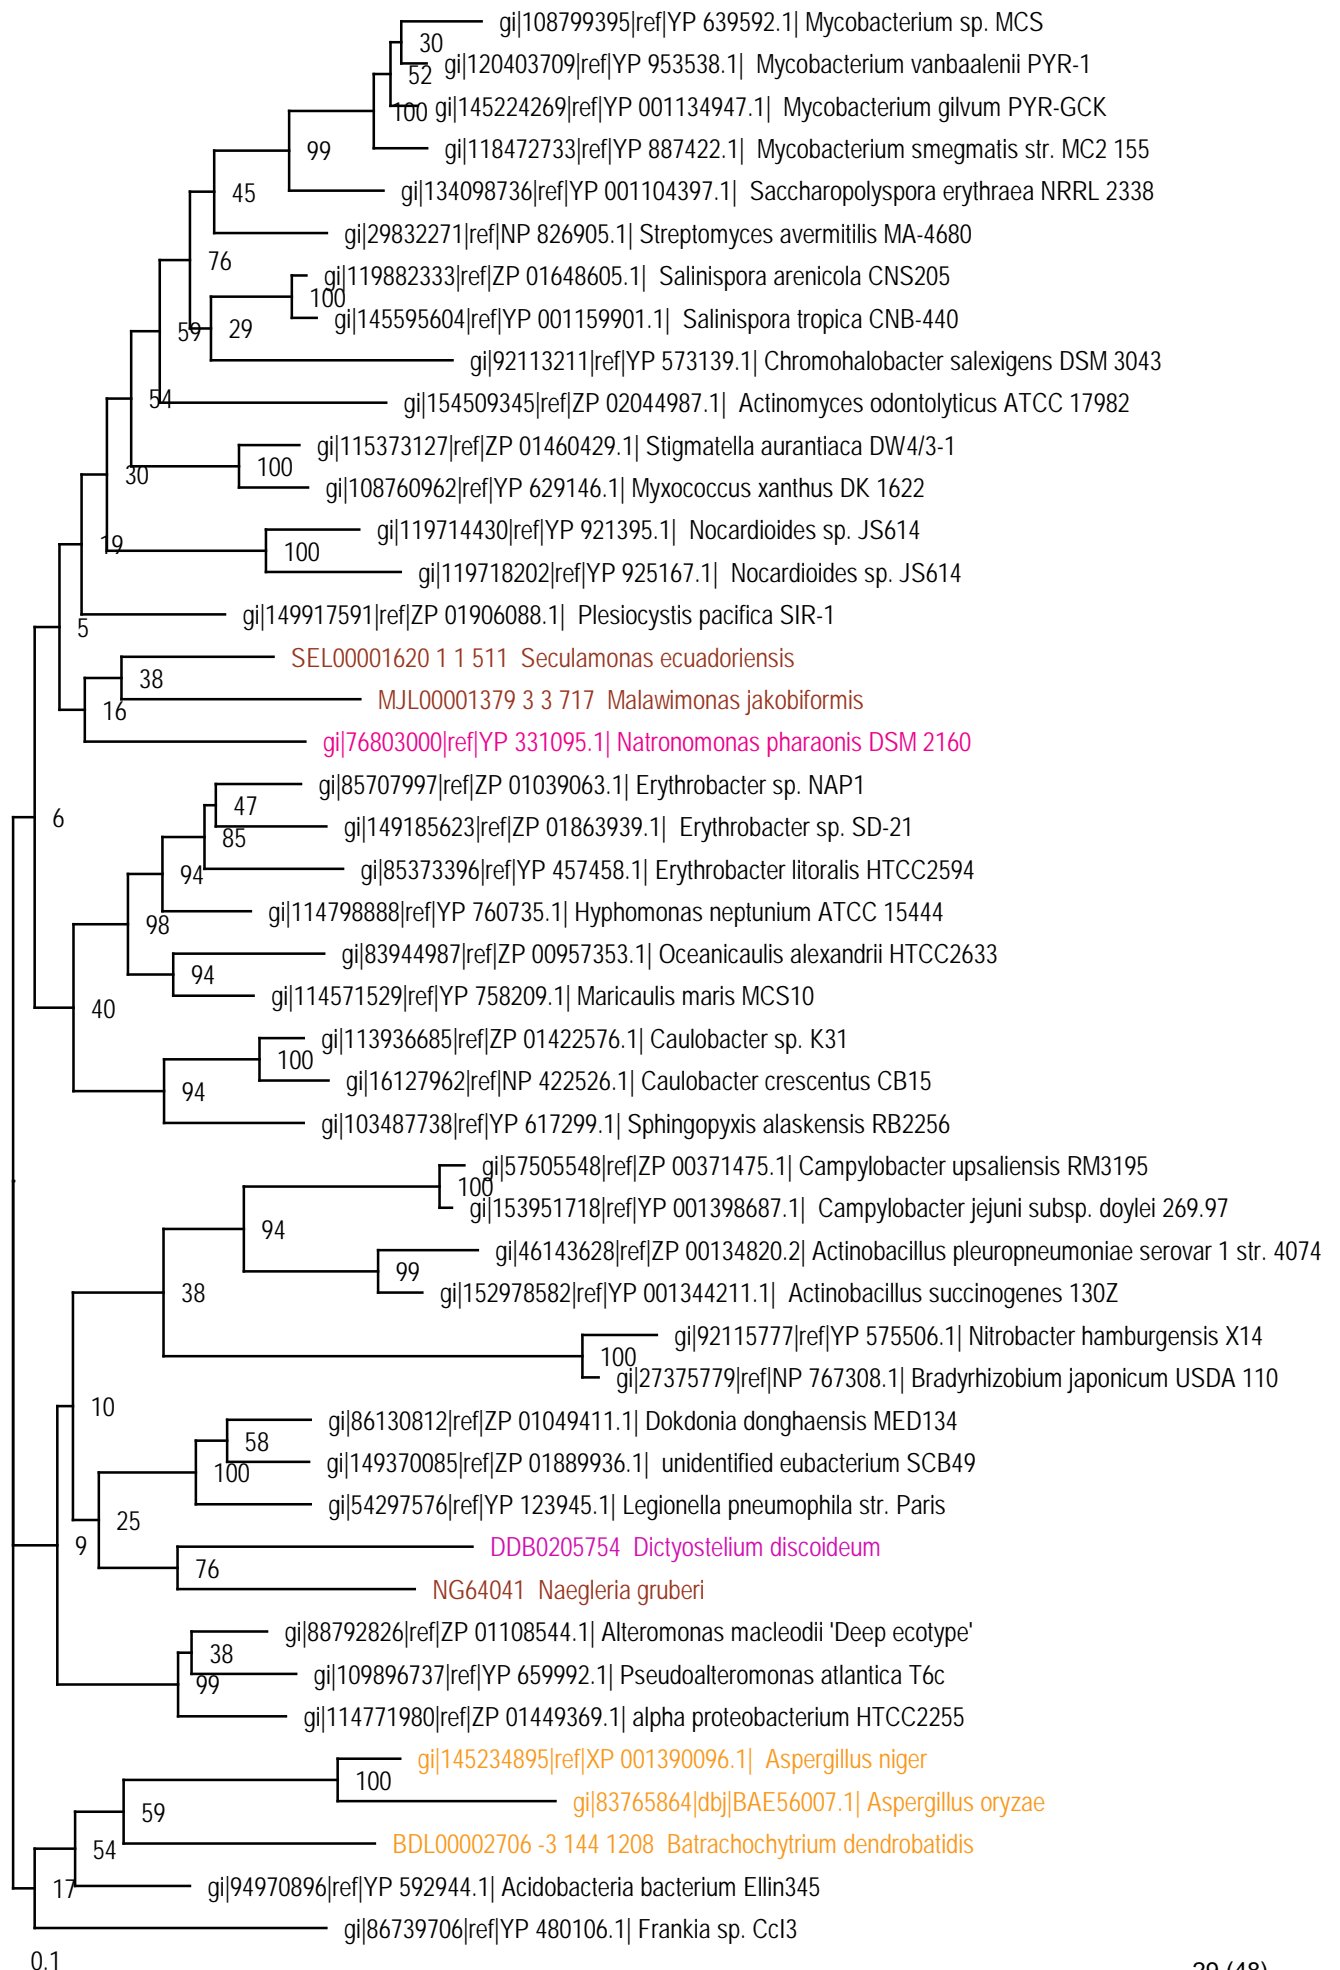

**Figure S1BD**

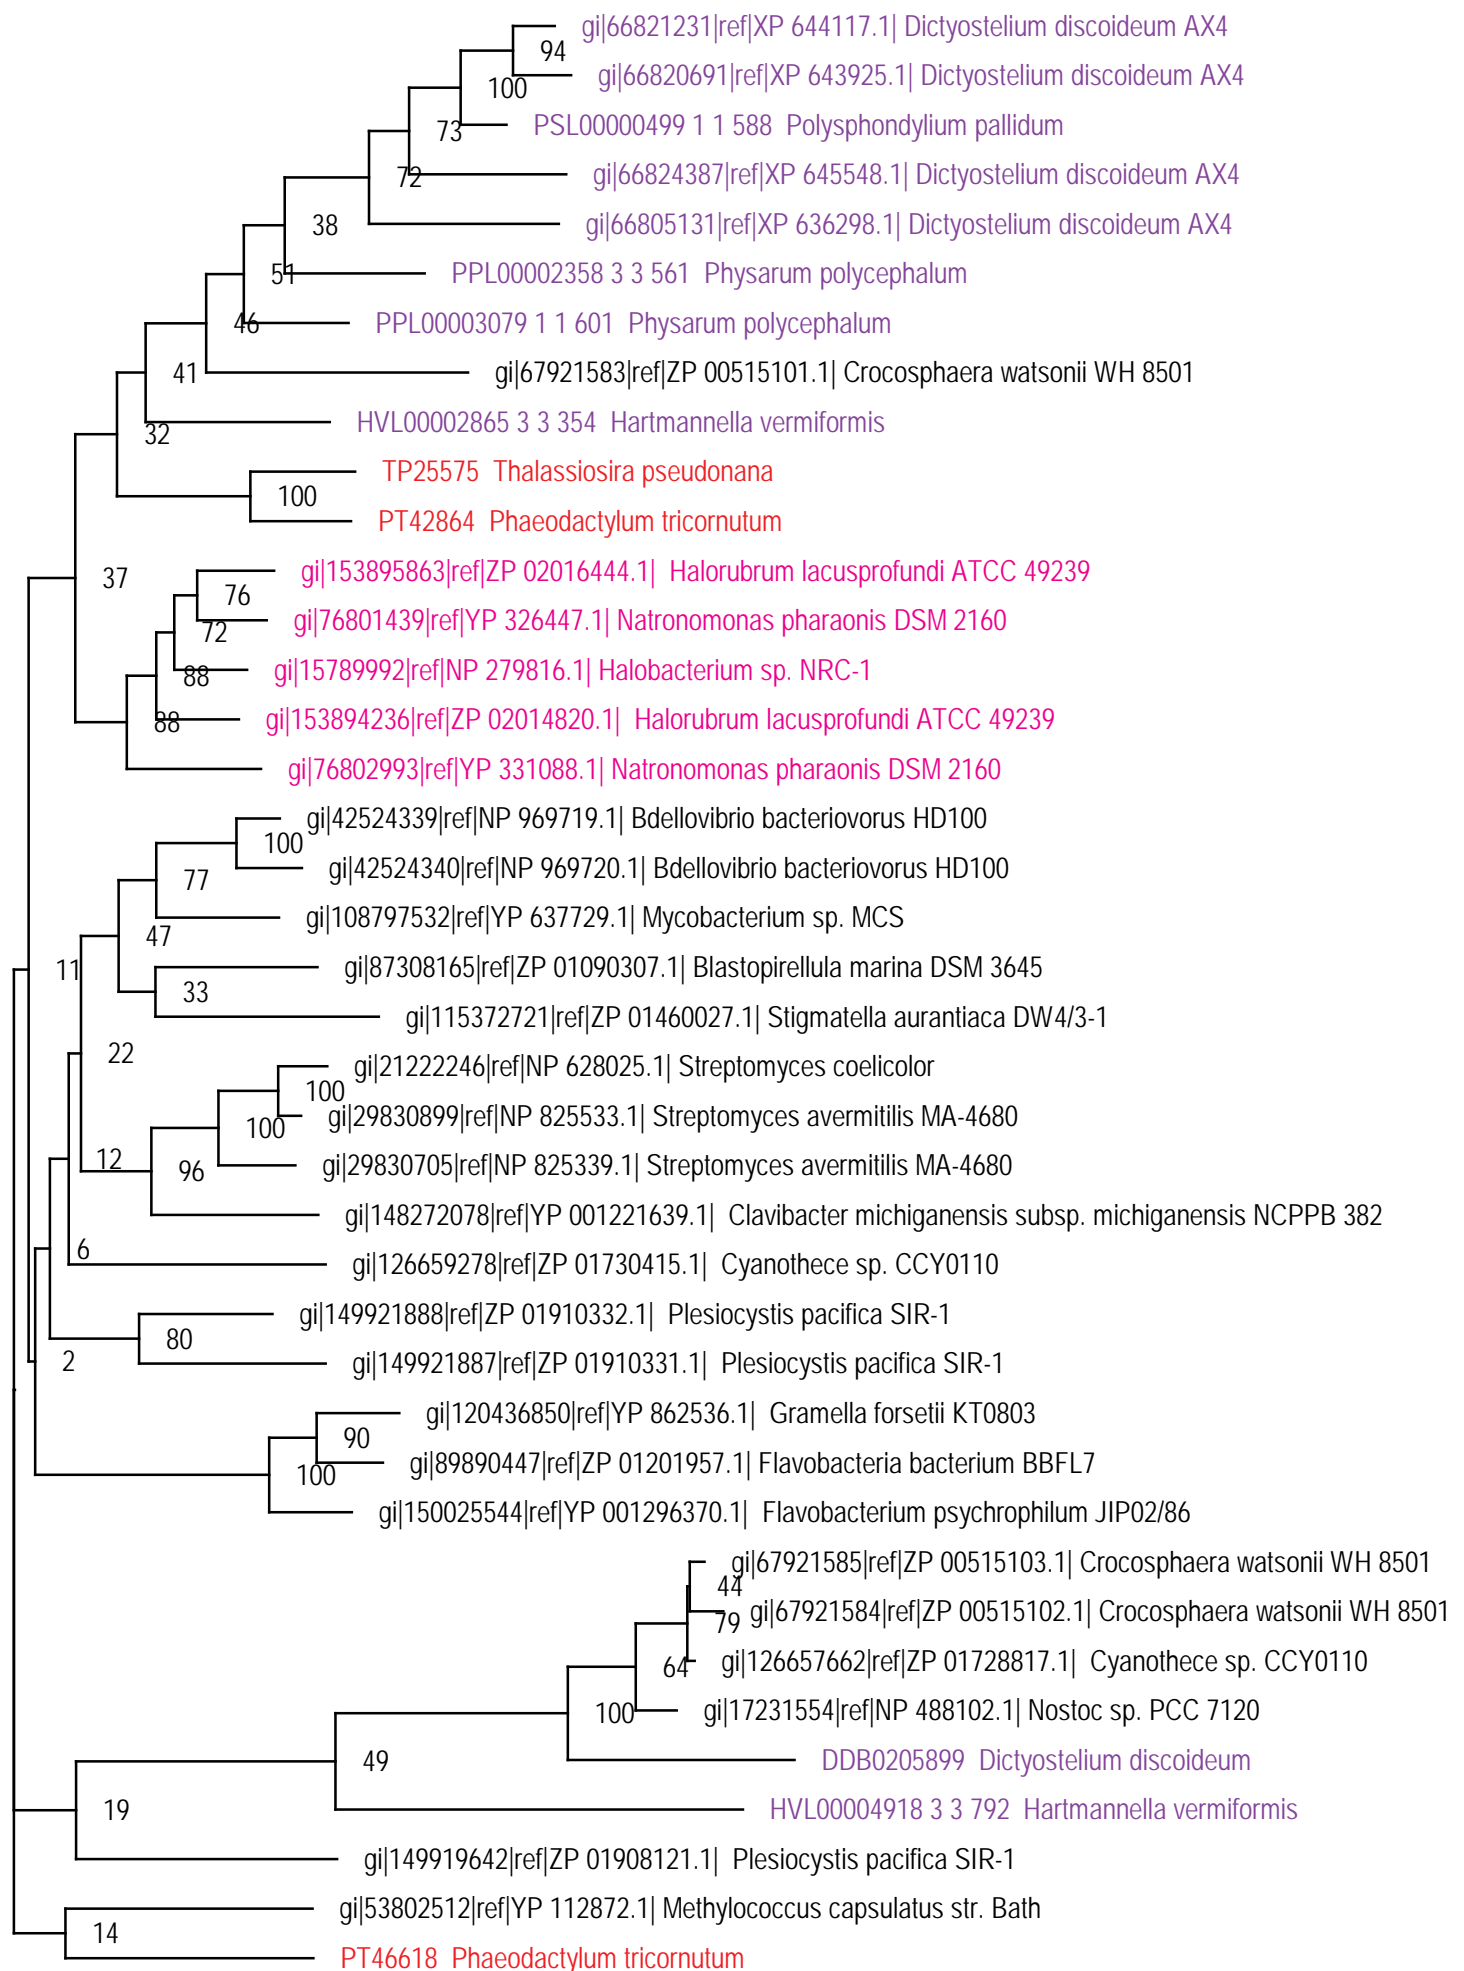

\_ 0.1



**Figure S1BE**

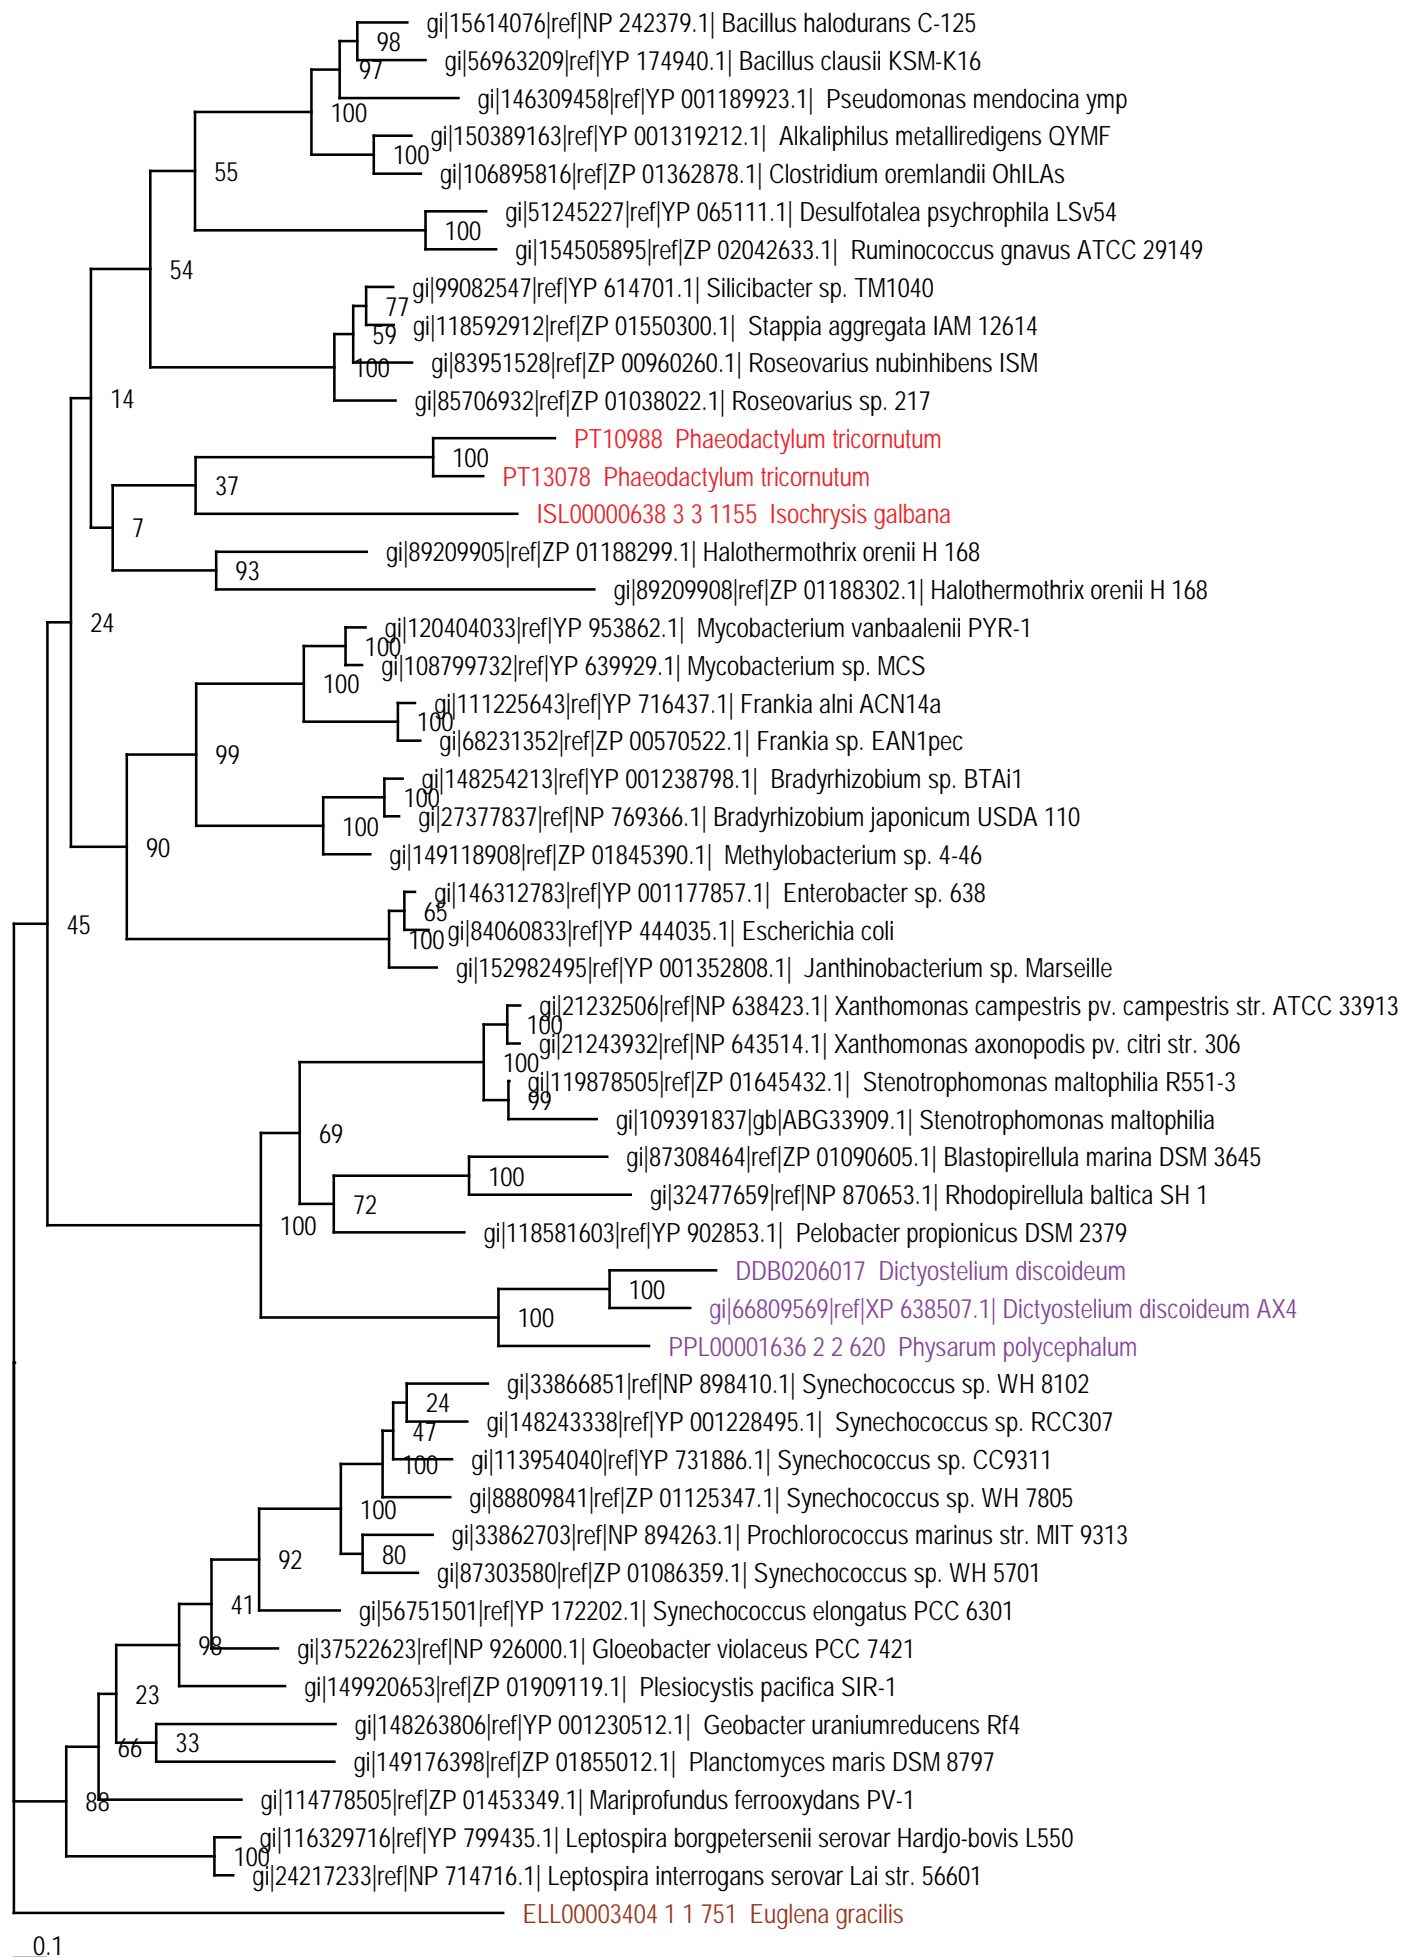

**Figure S1BF**

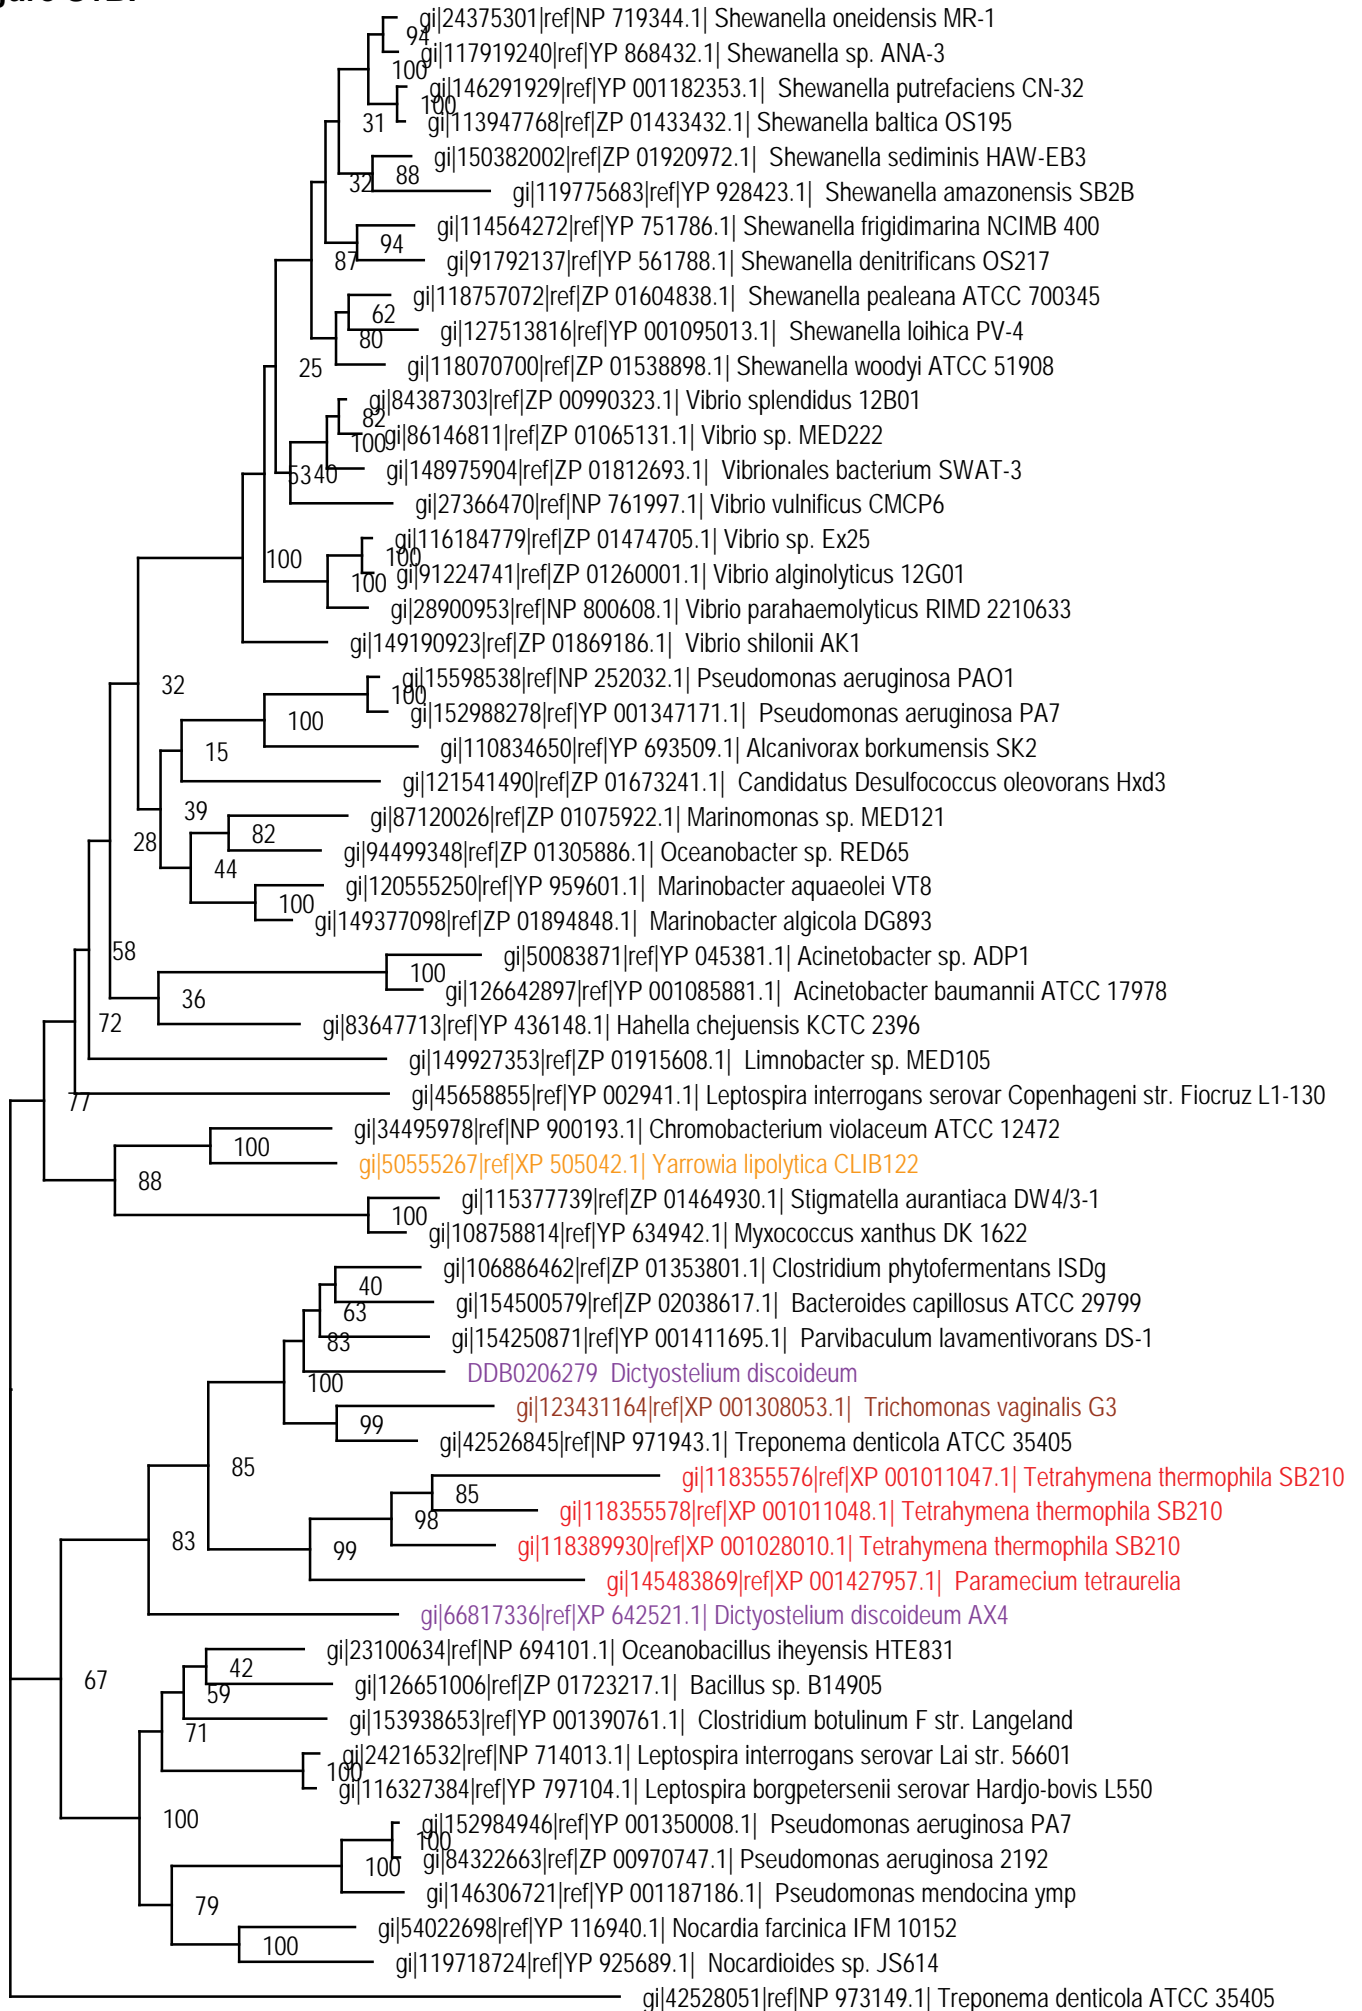

0.1



**Figure S1BG**

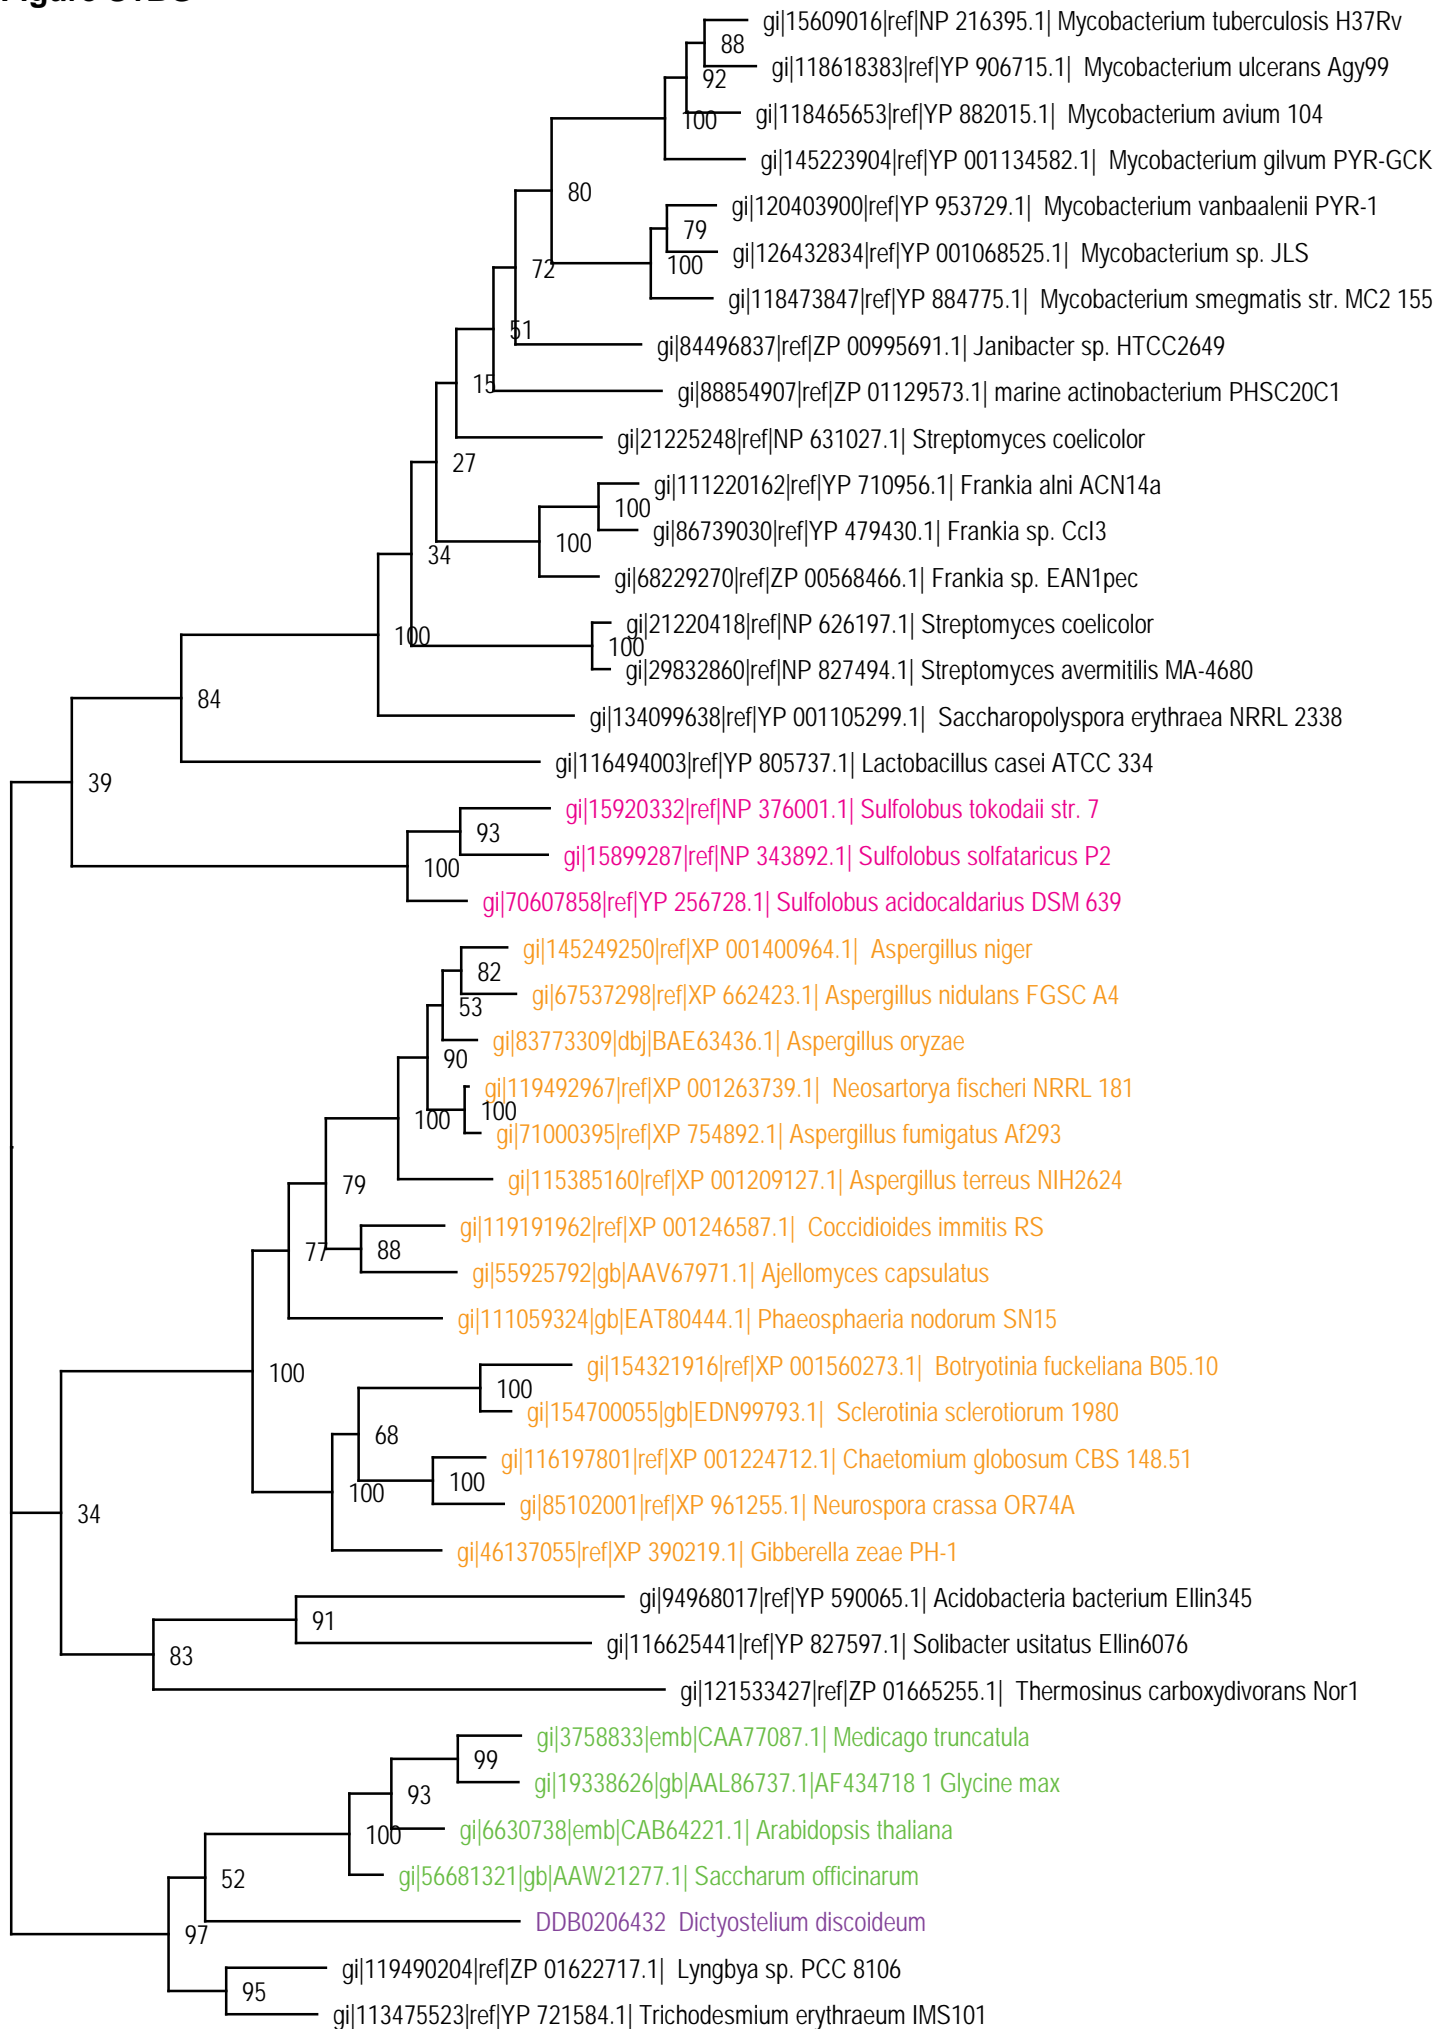

Figure S1BH

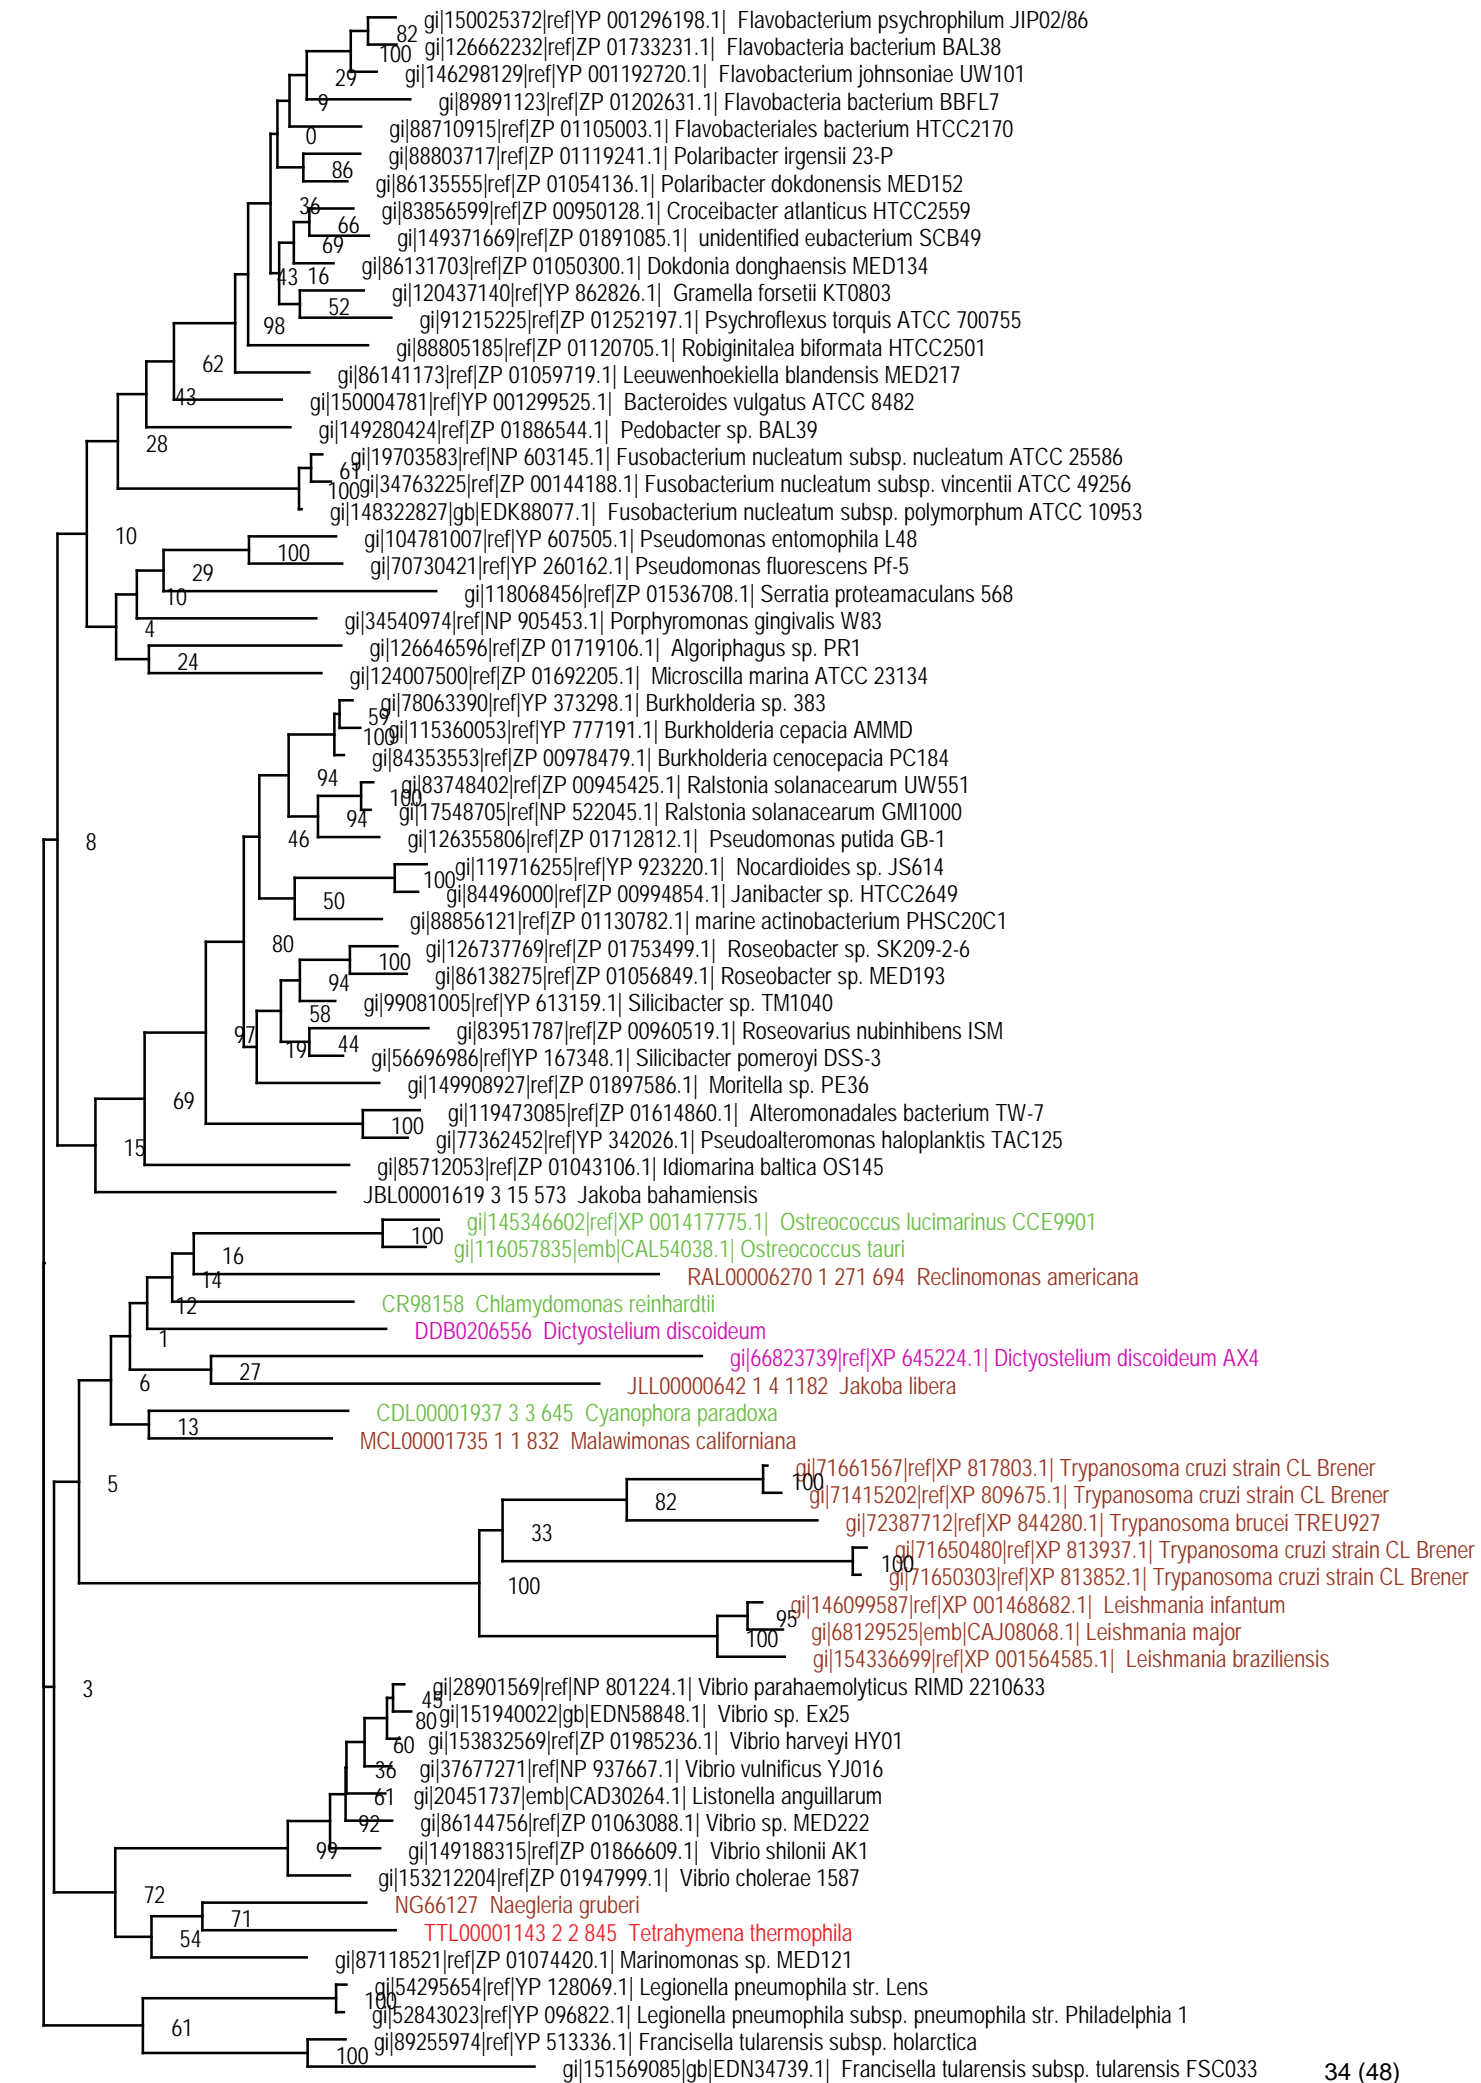

Figure S1BI

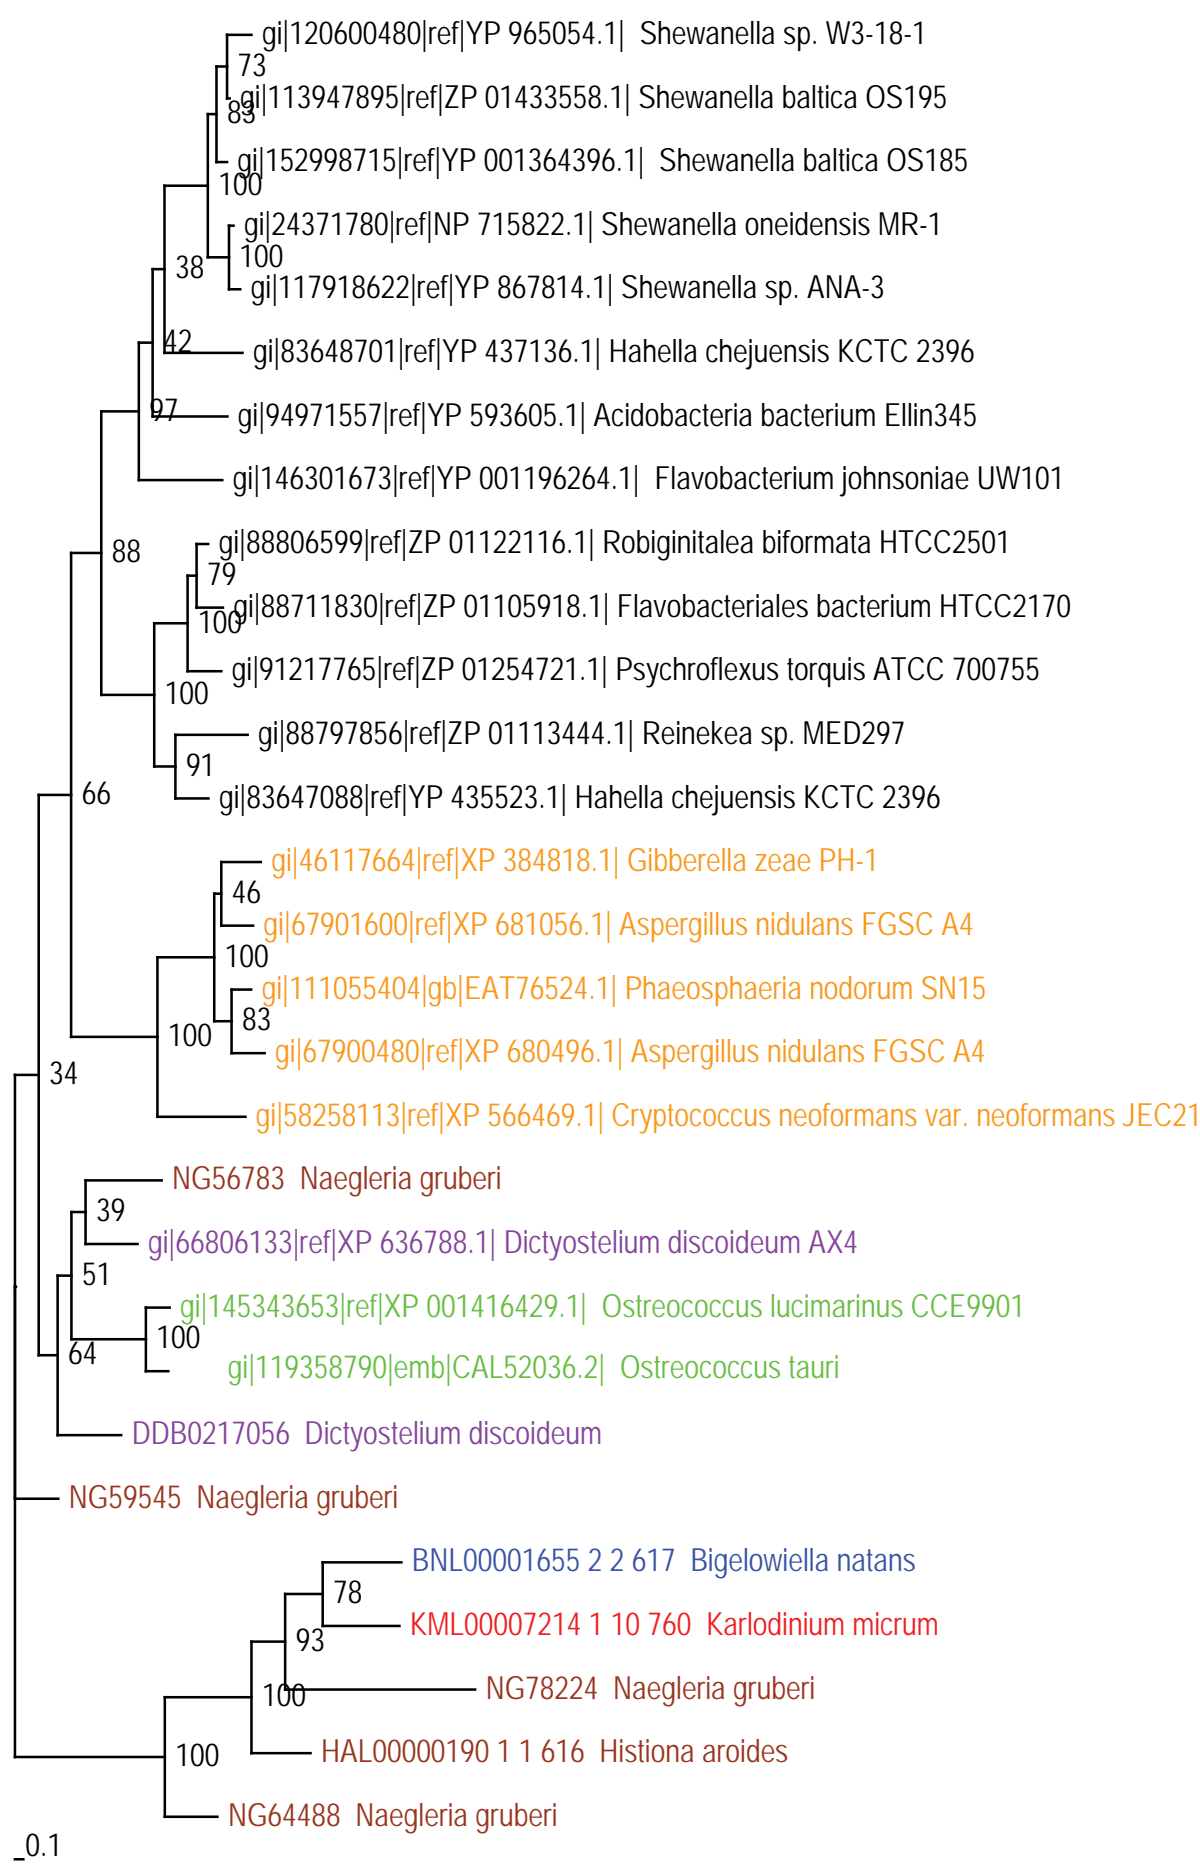

Figure S1BJ

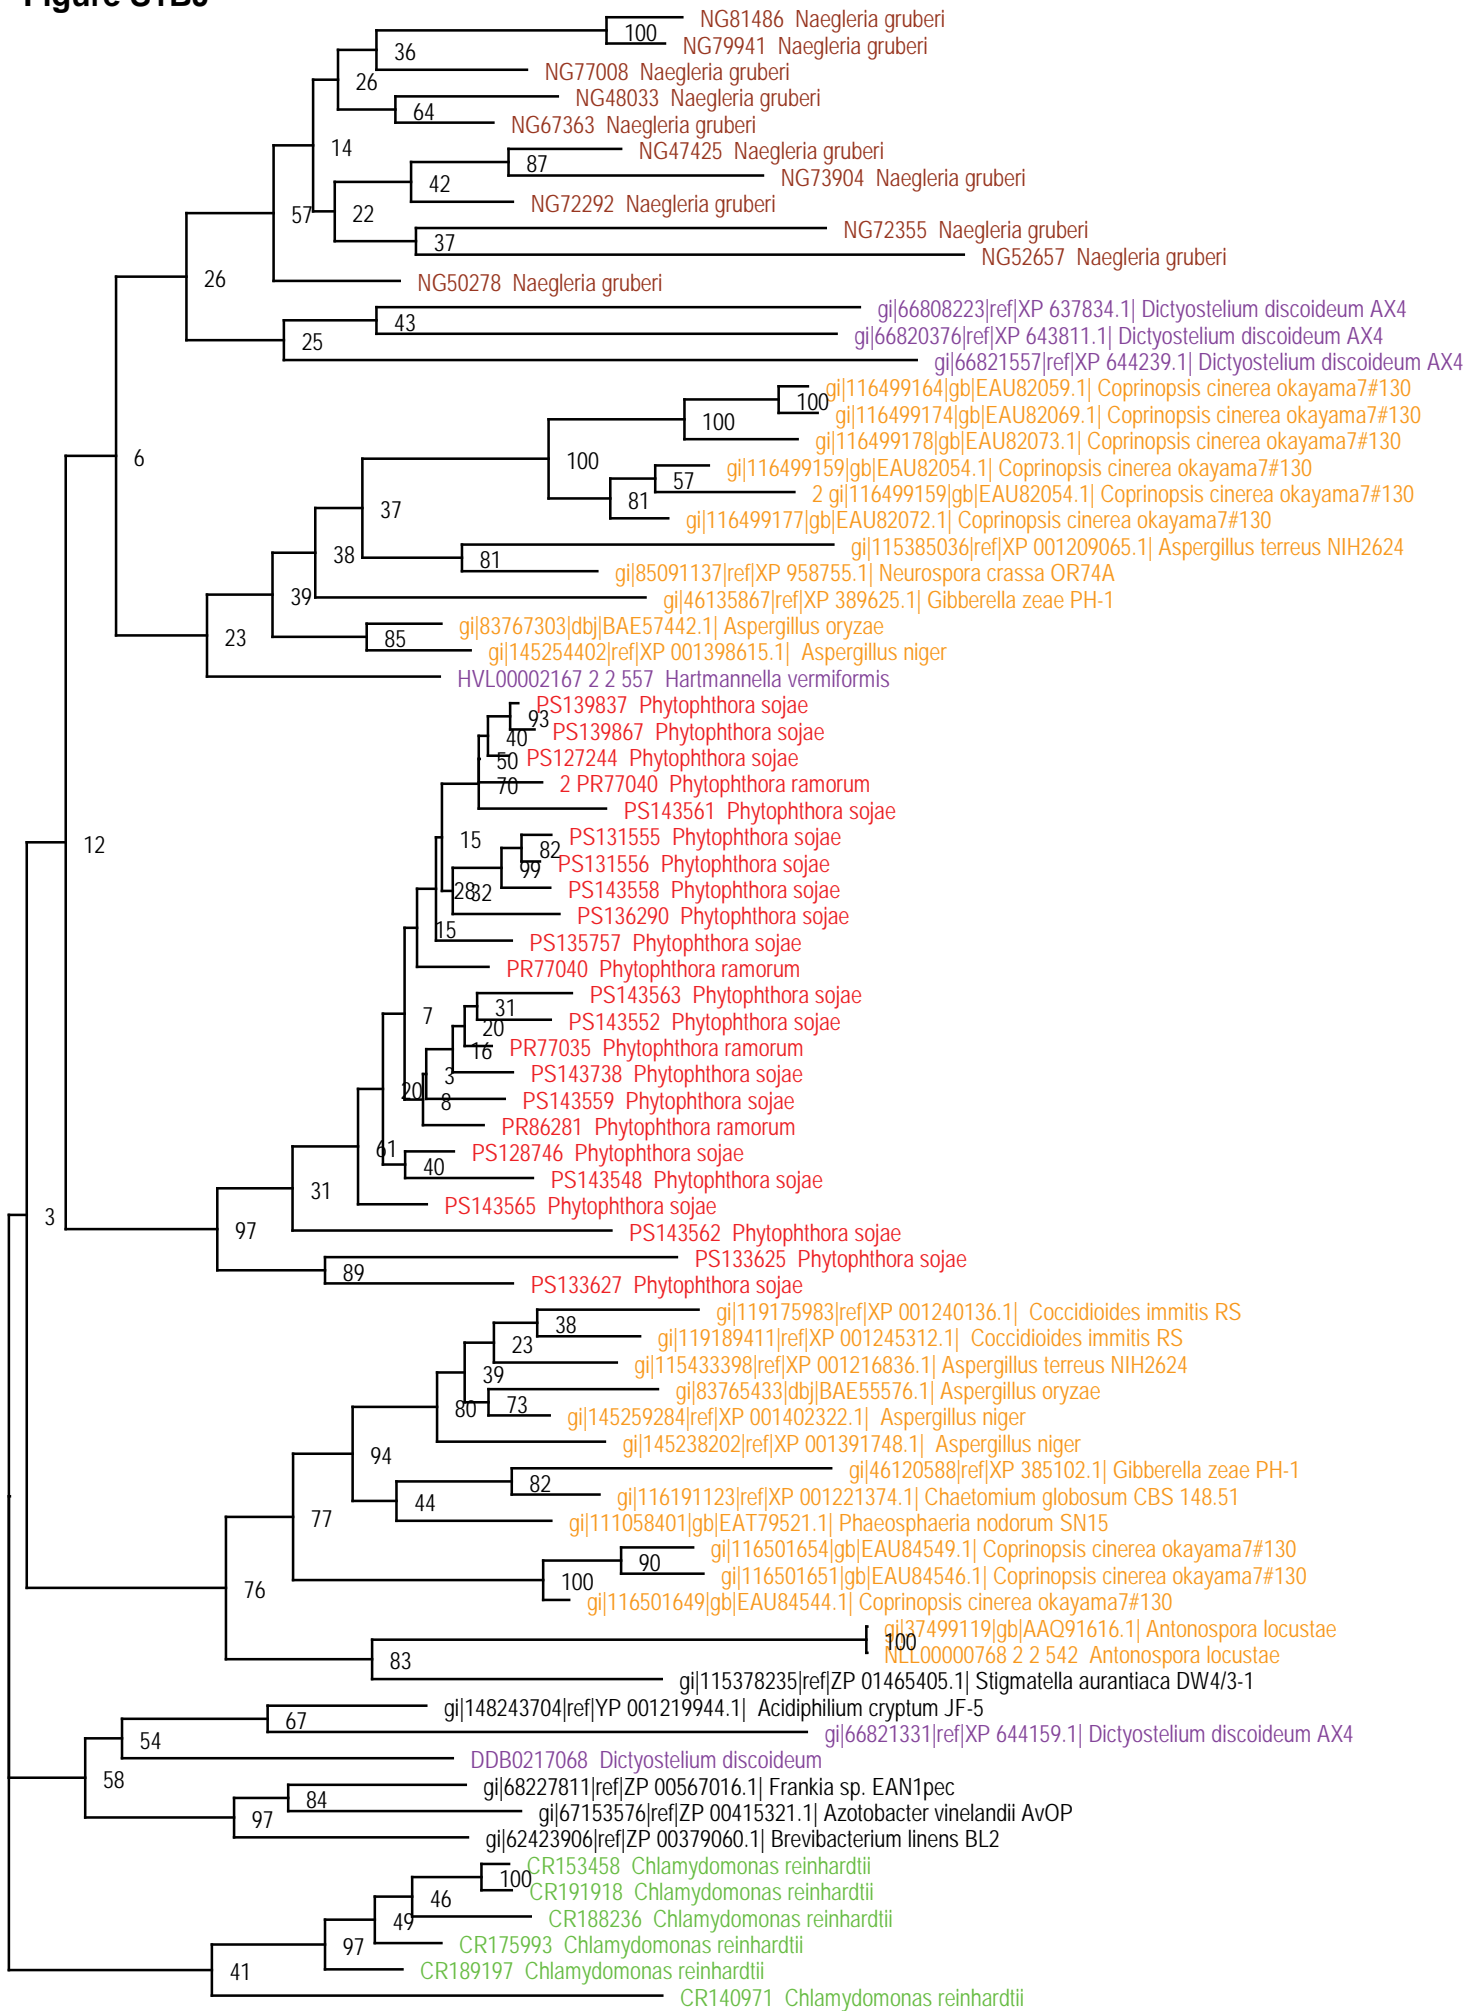

0.1

Figure S1BK

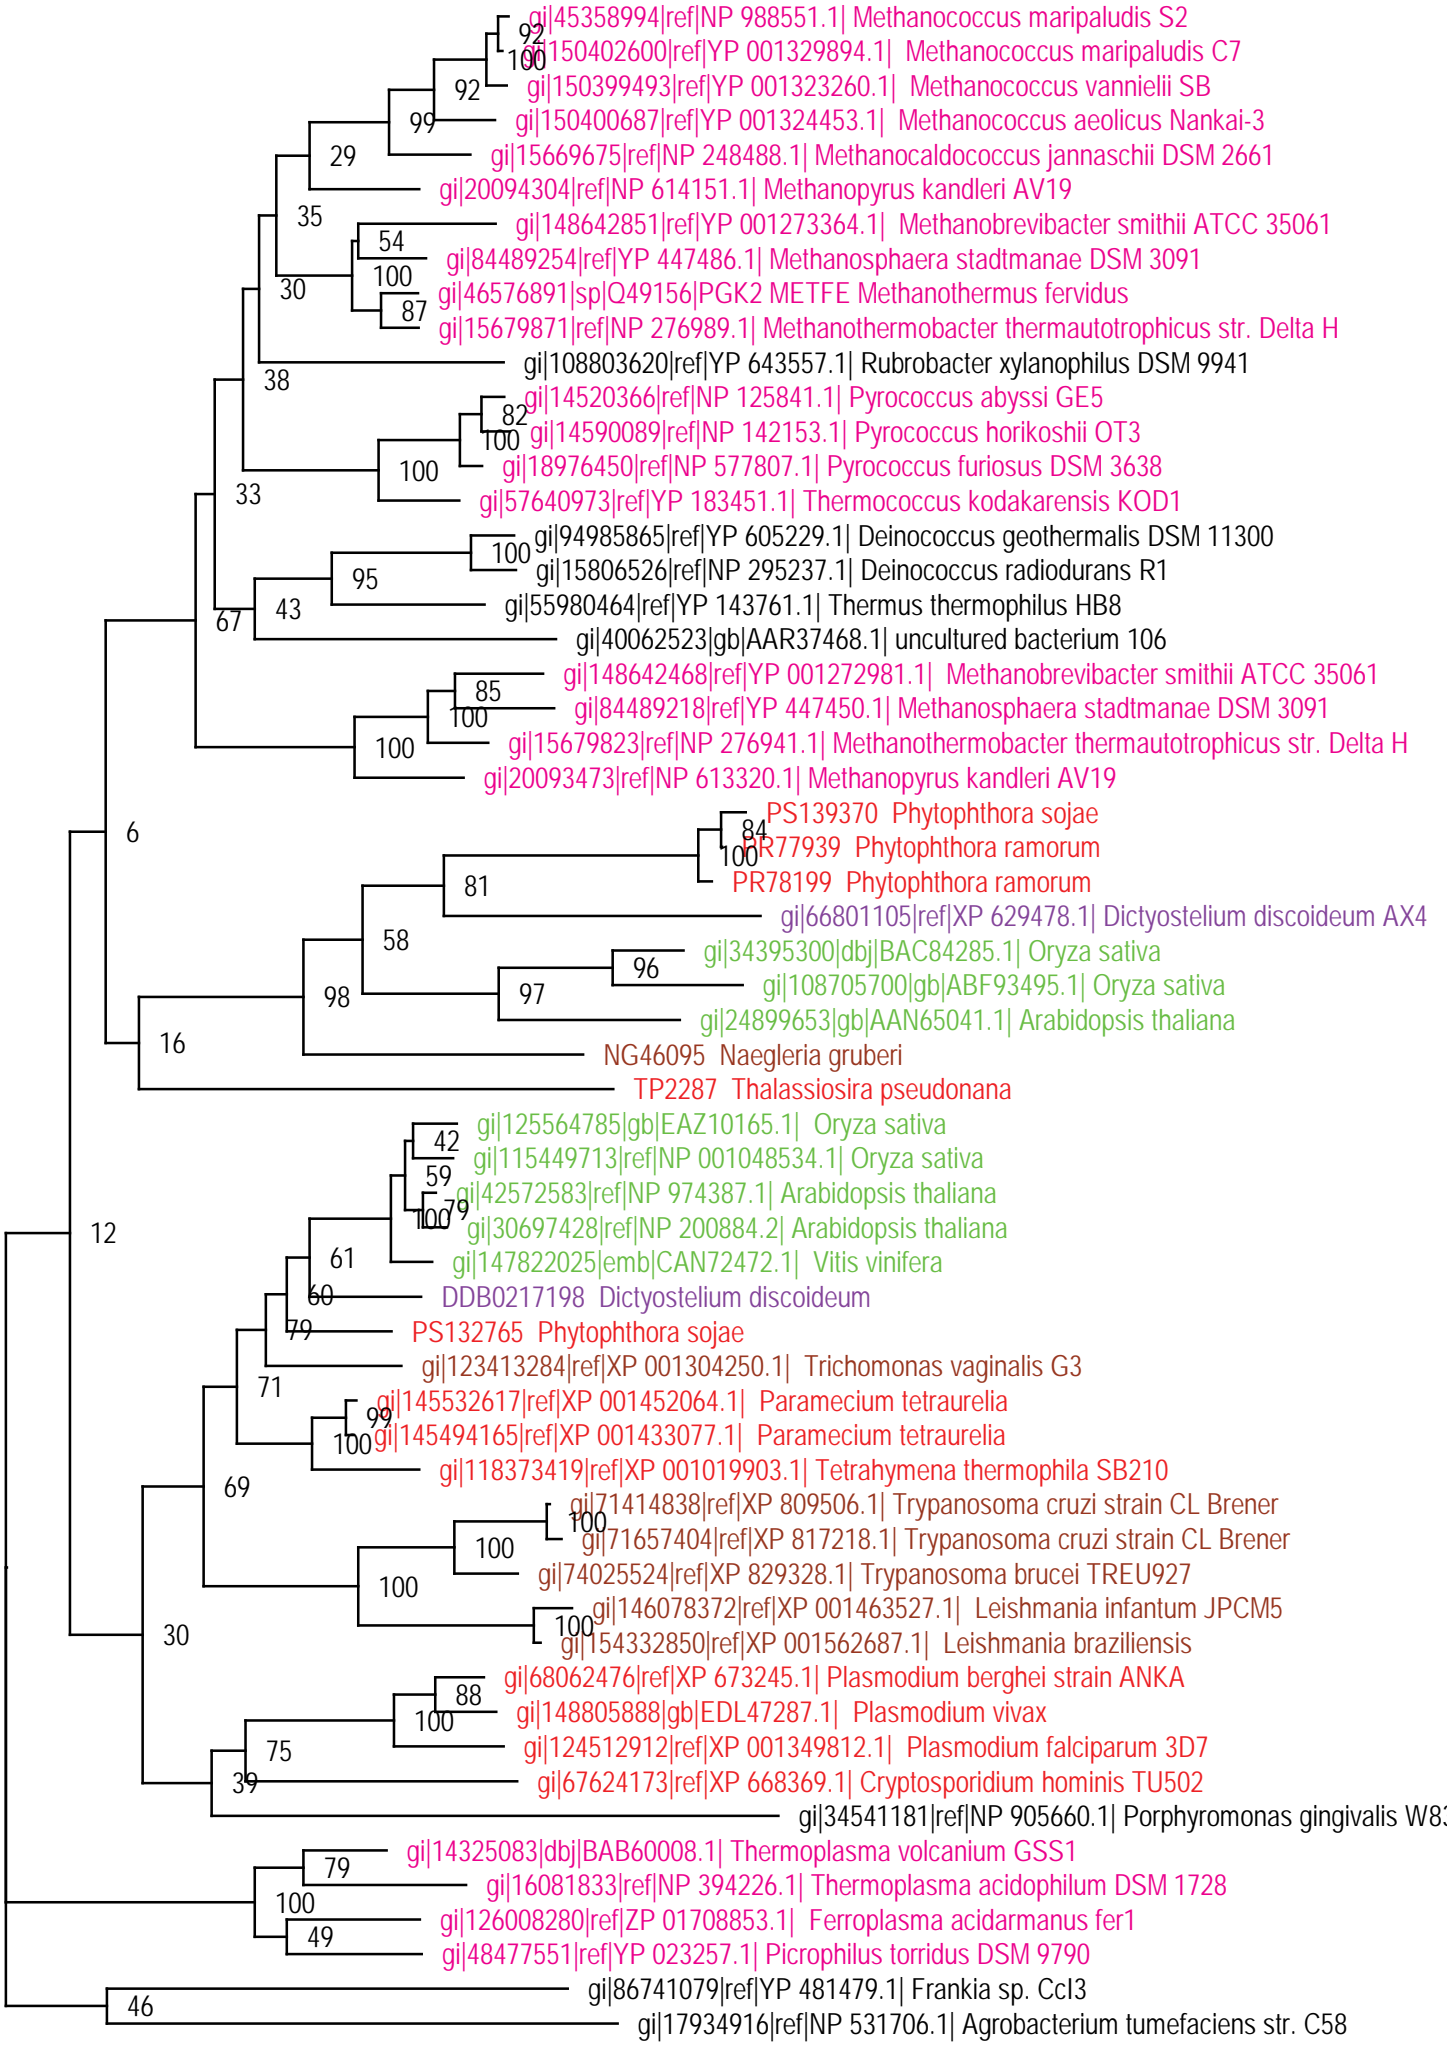



**Figure S1BL**

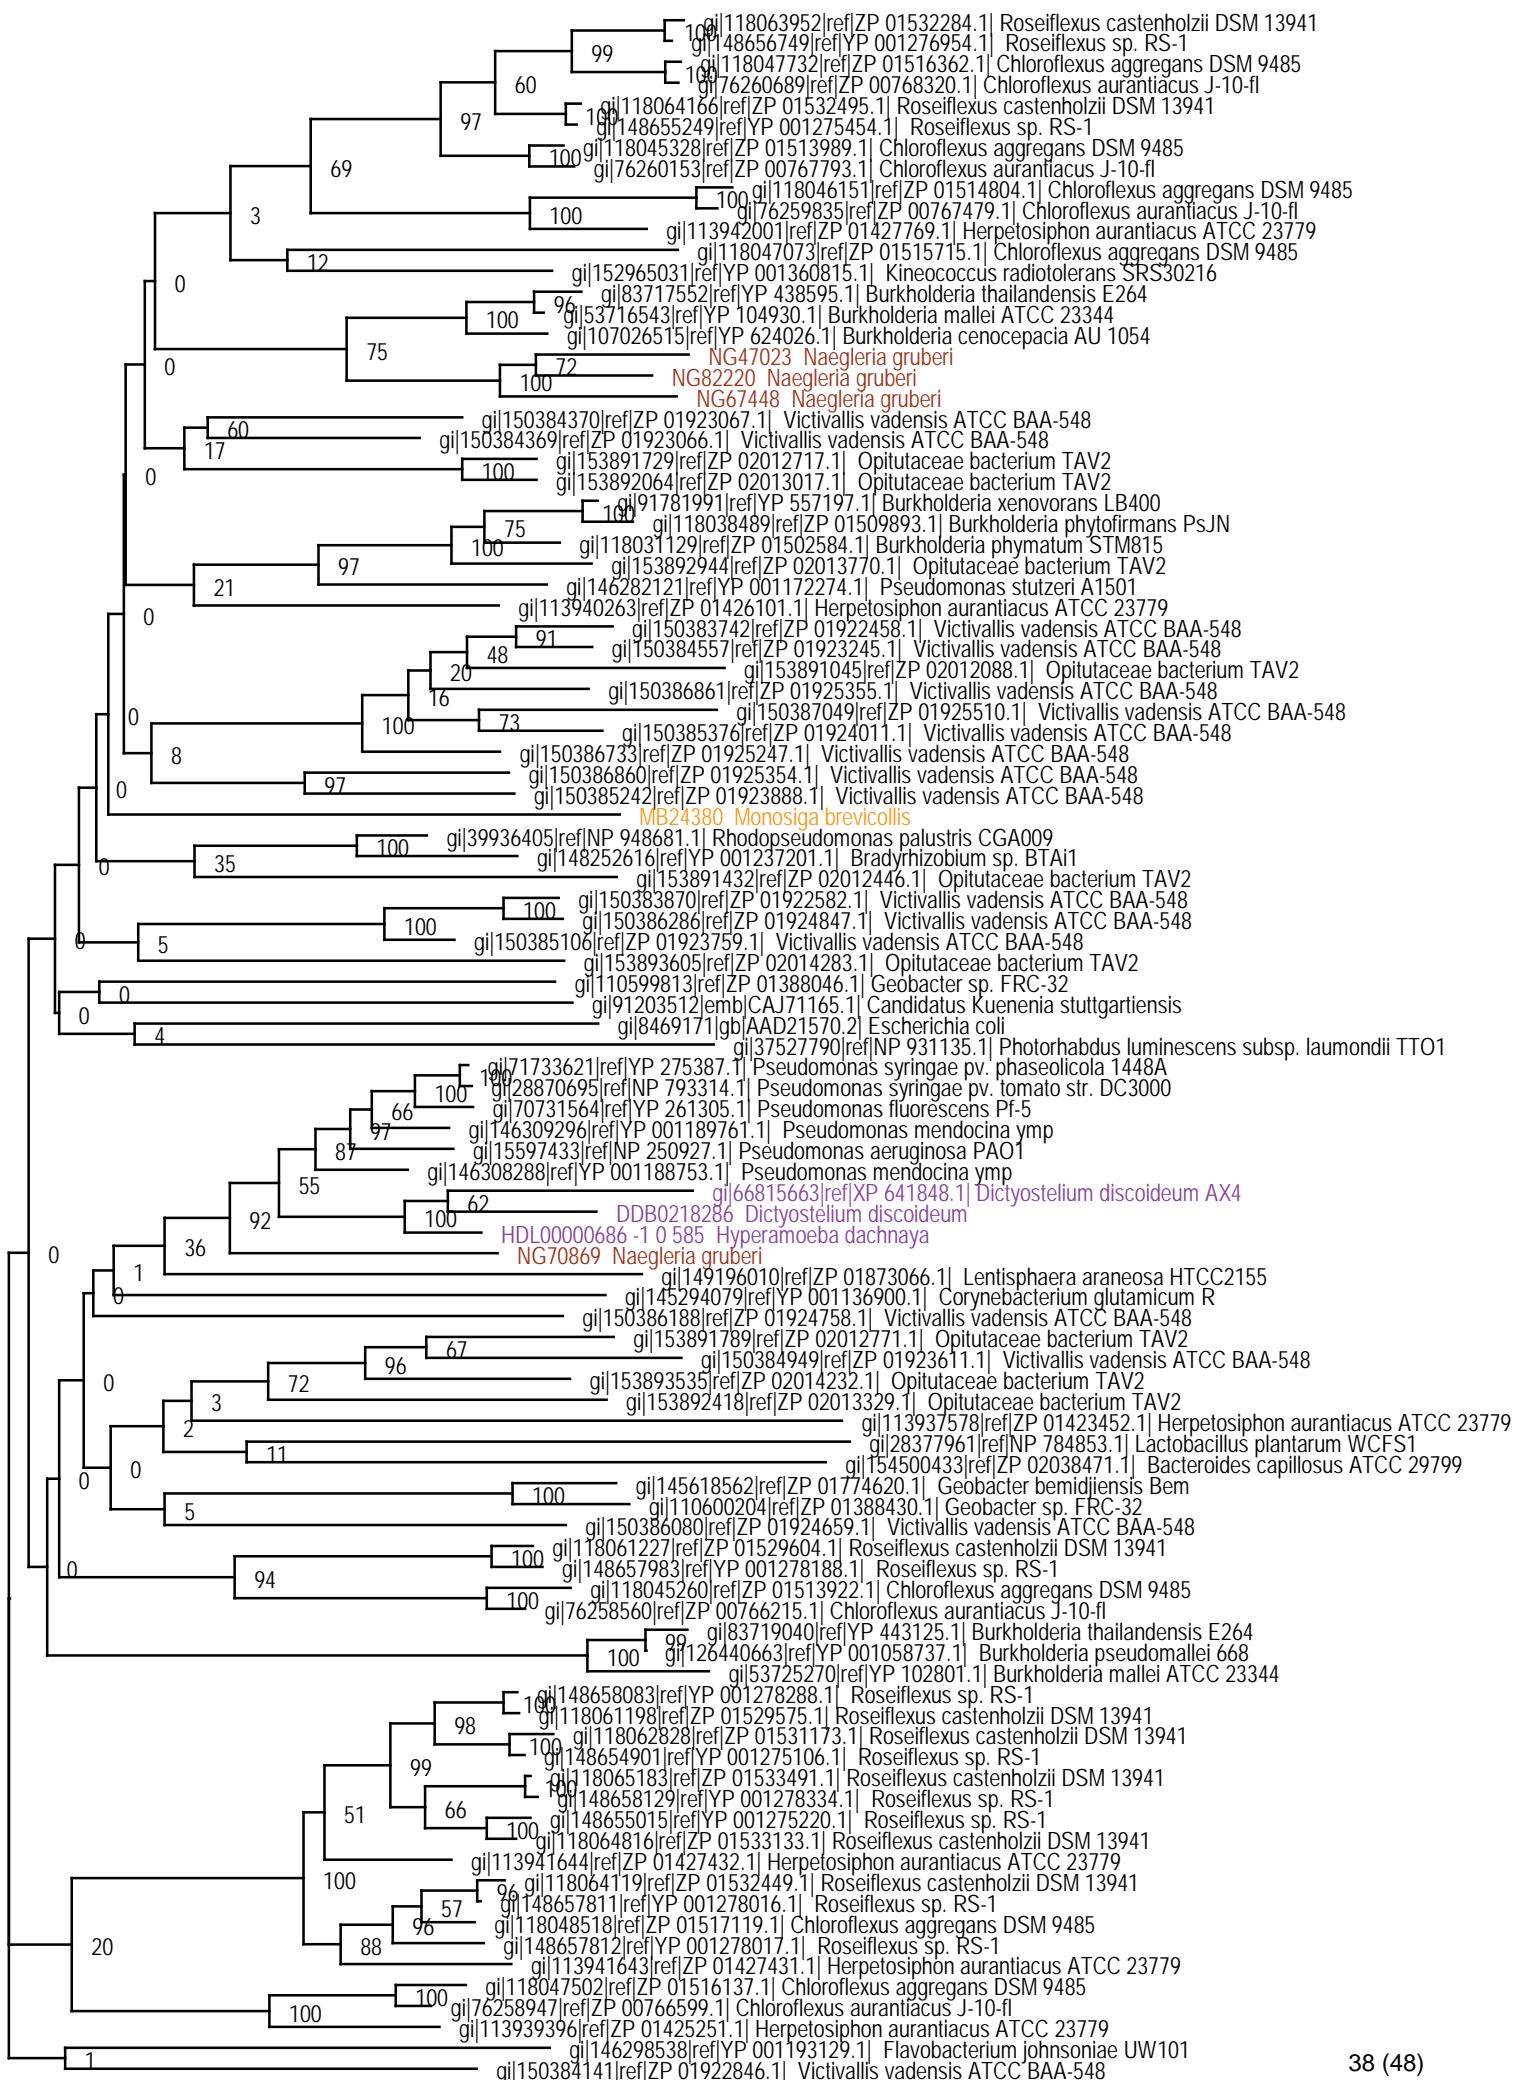

**Figure S1BM**

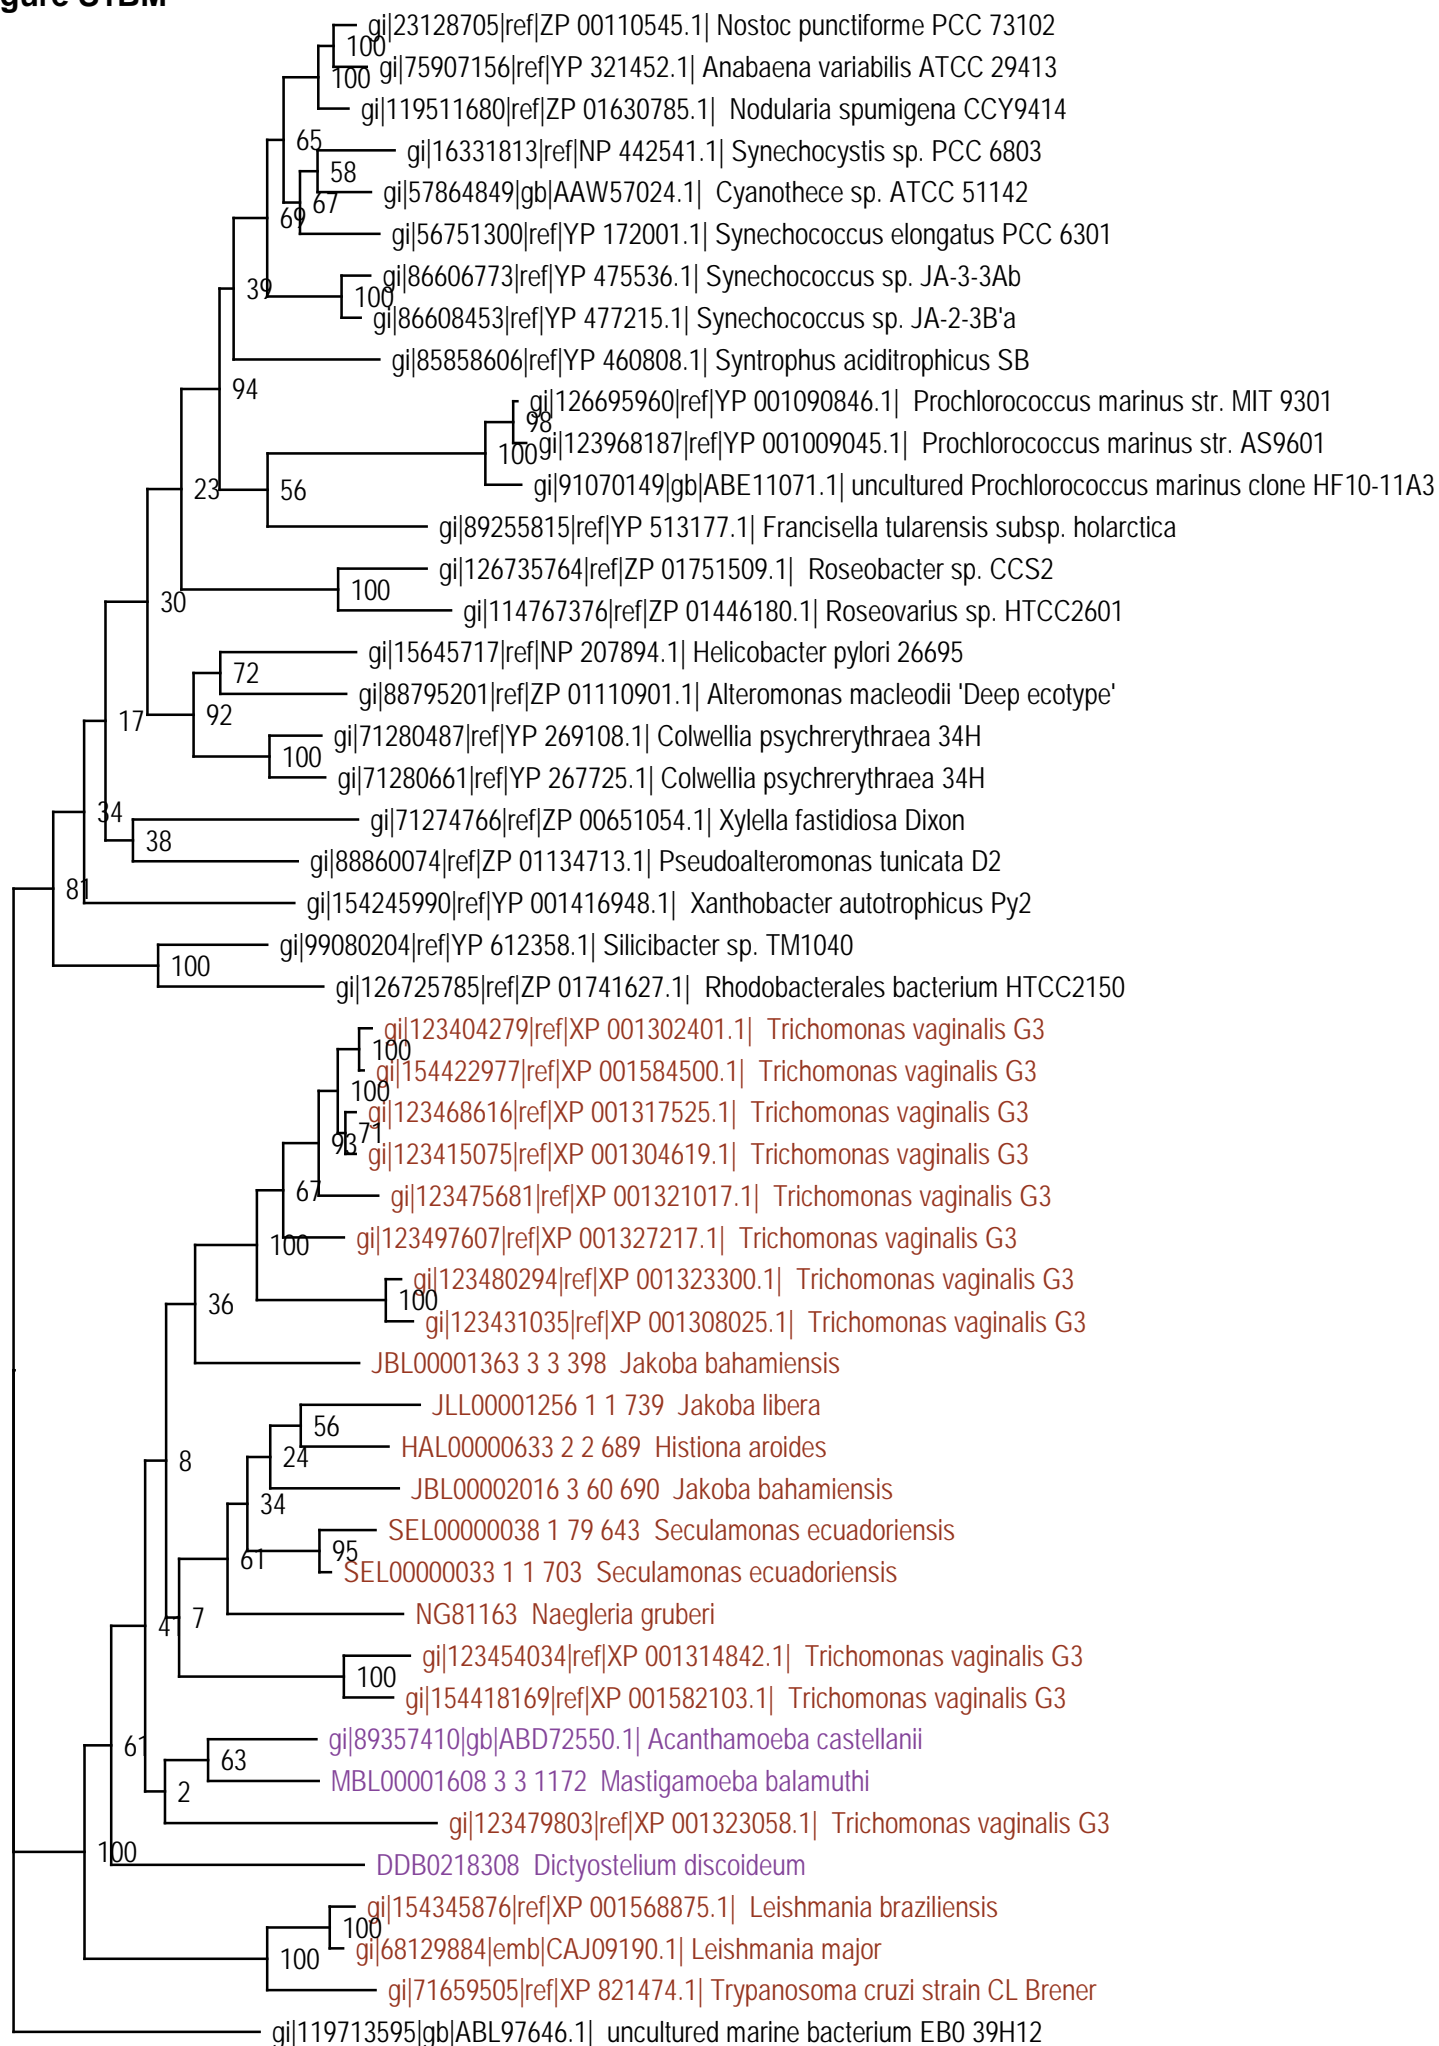

Figure S1BN

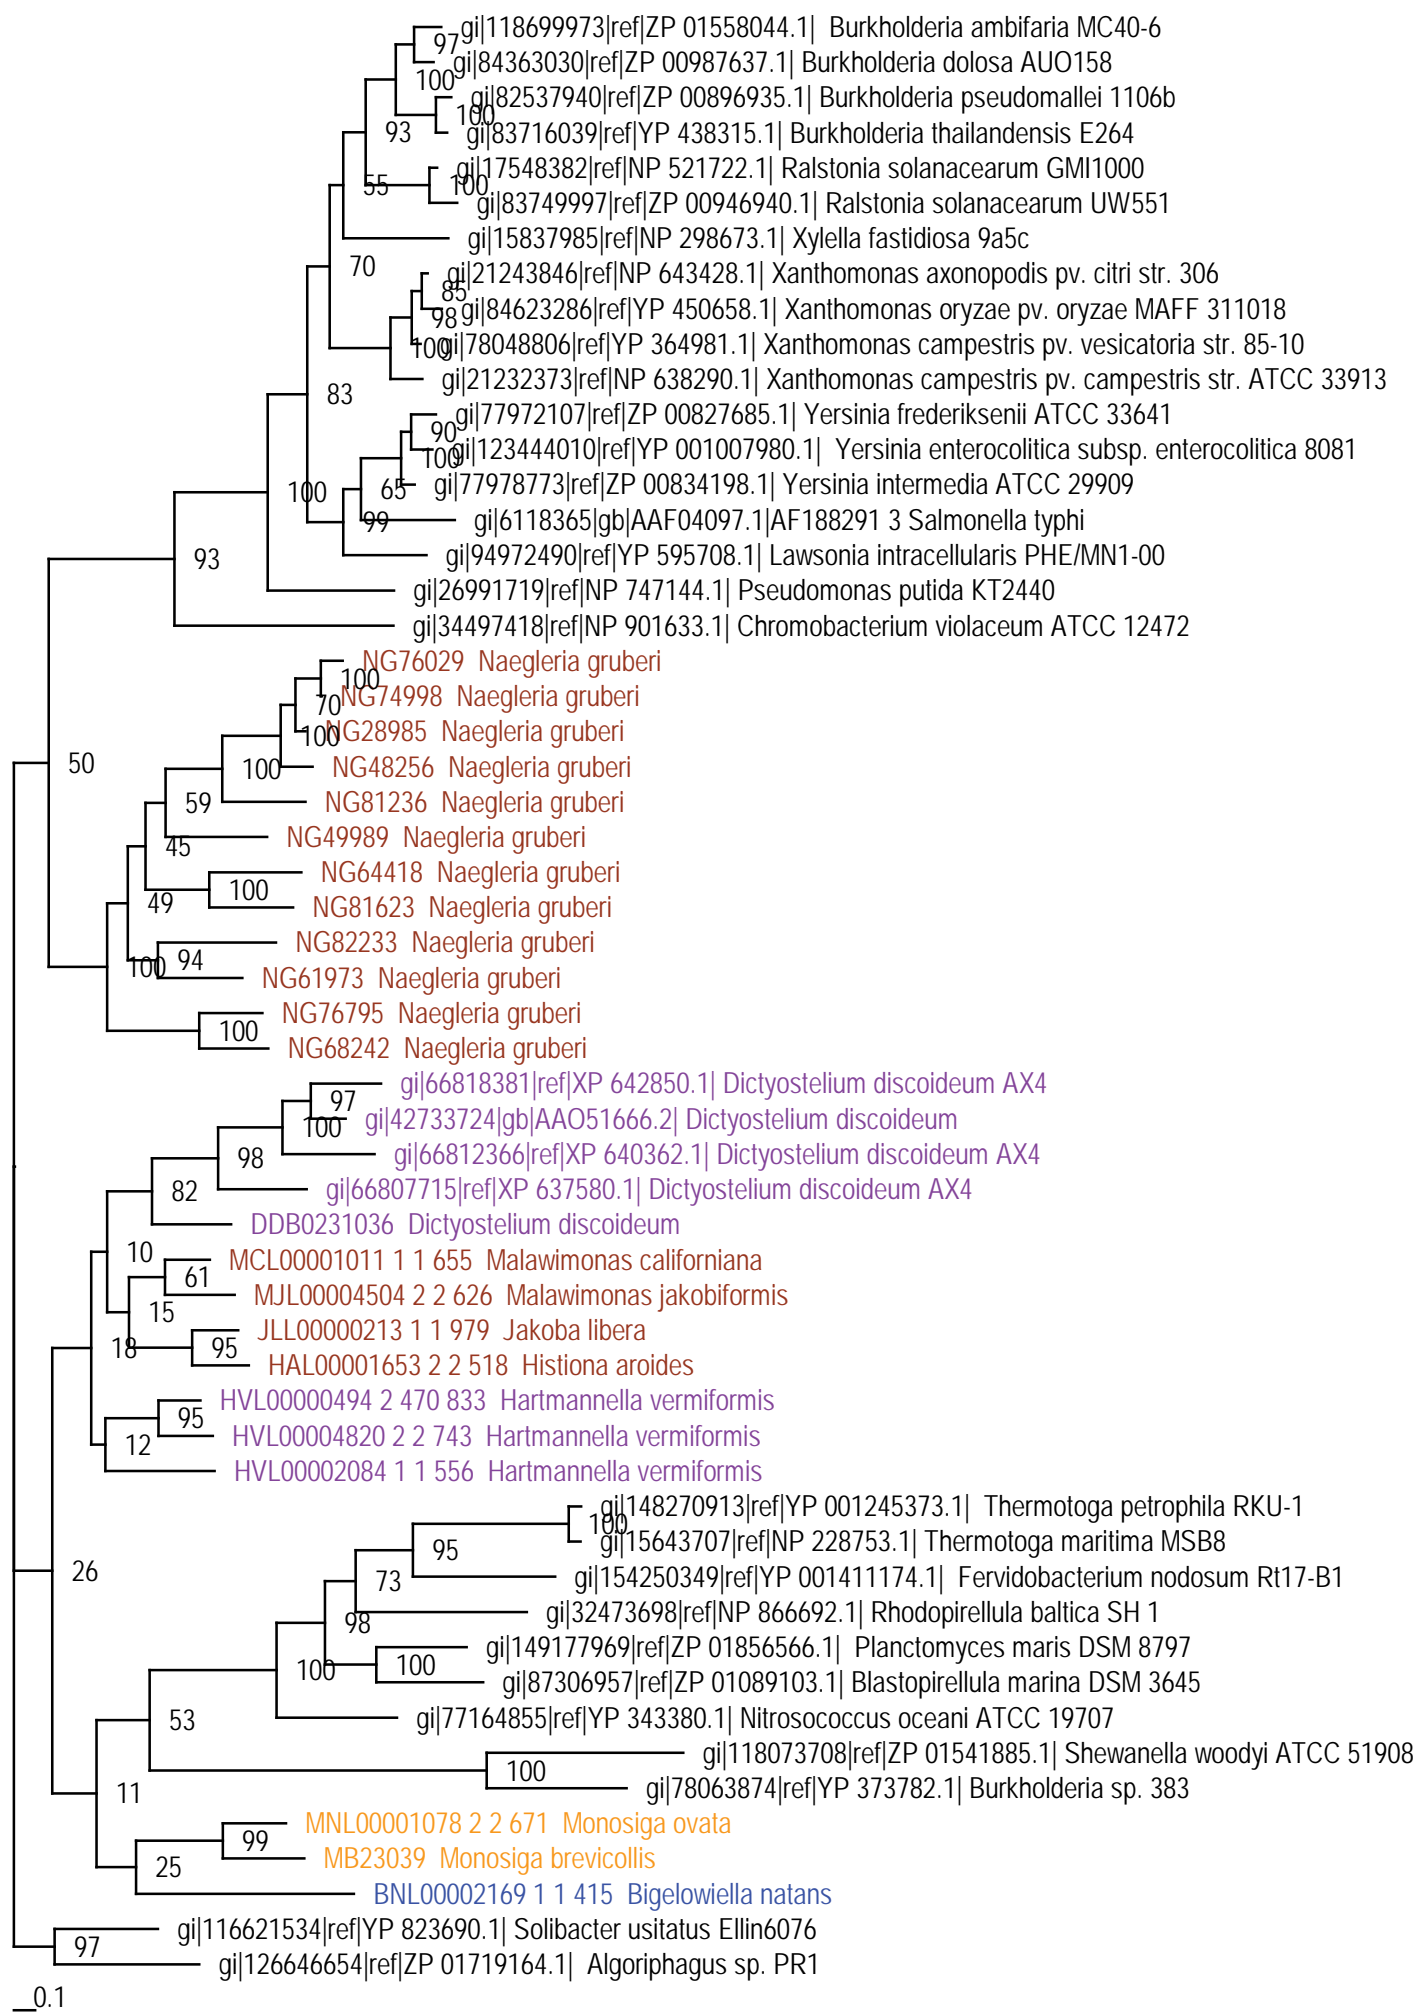



0.1

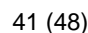

**Figure S1BP**

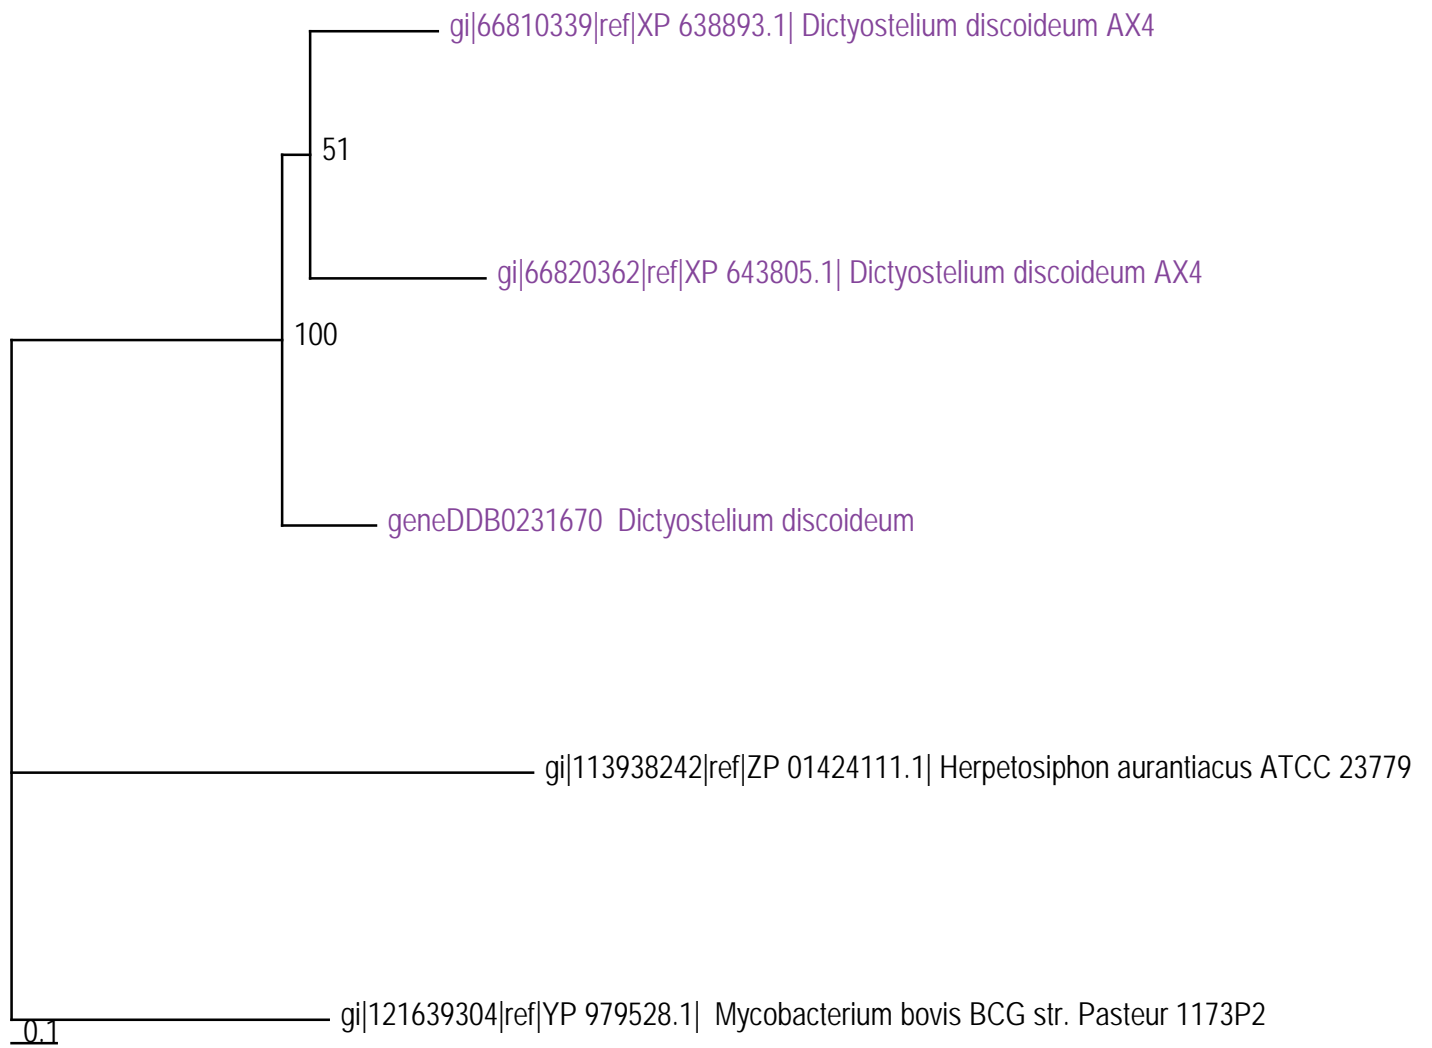

Figure S1BQ

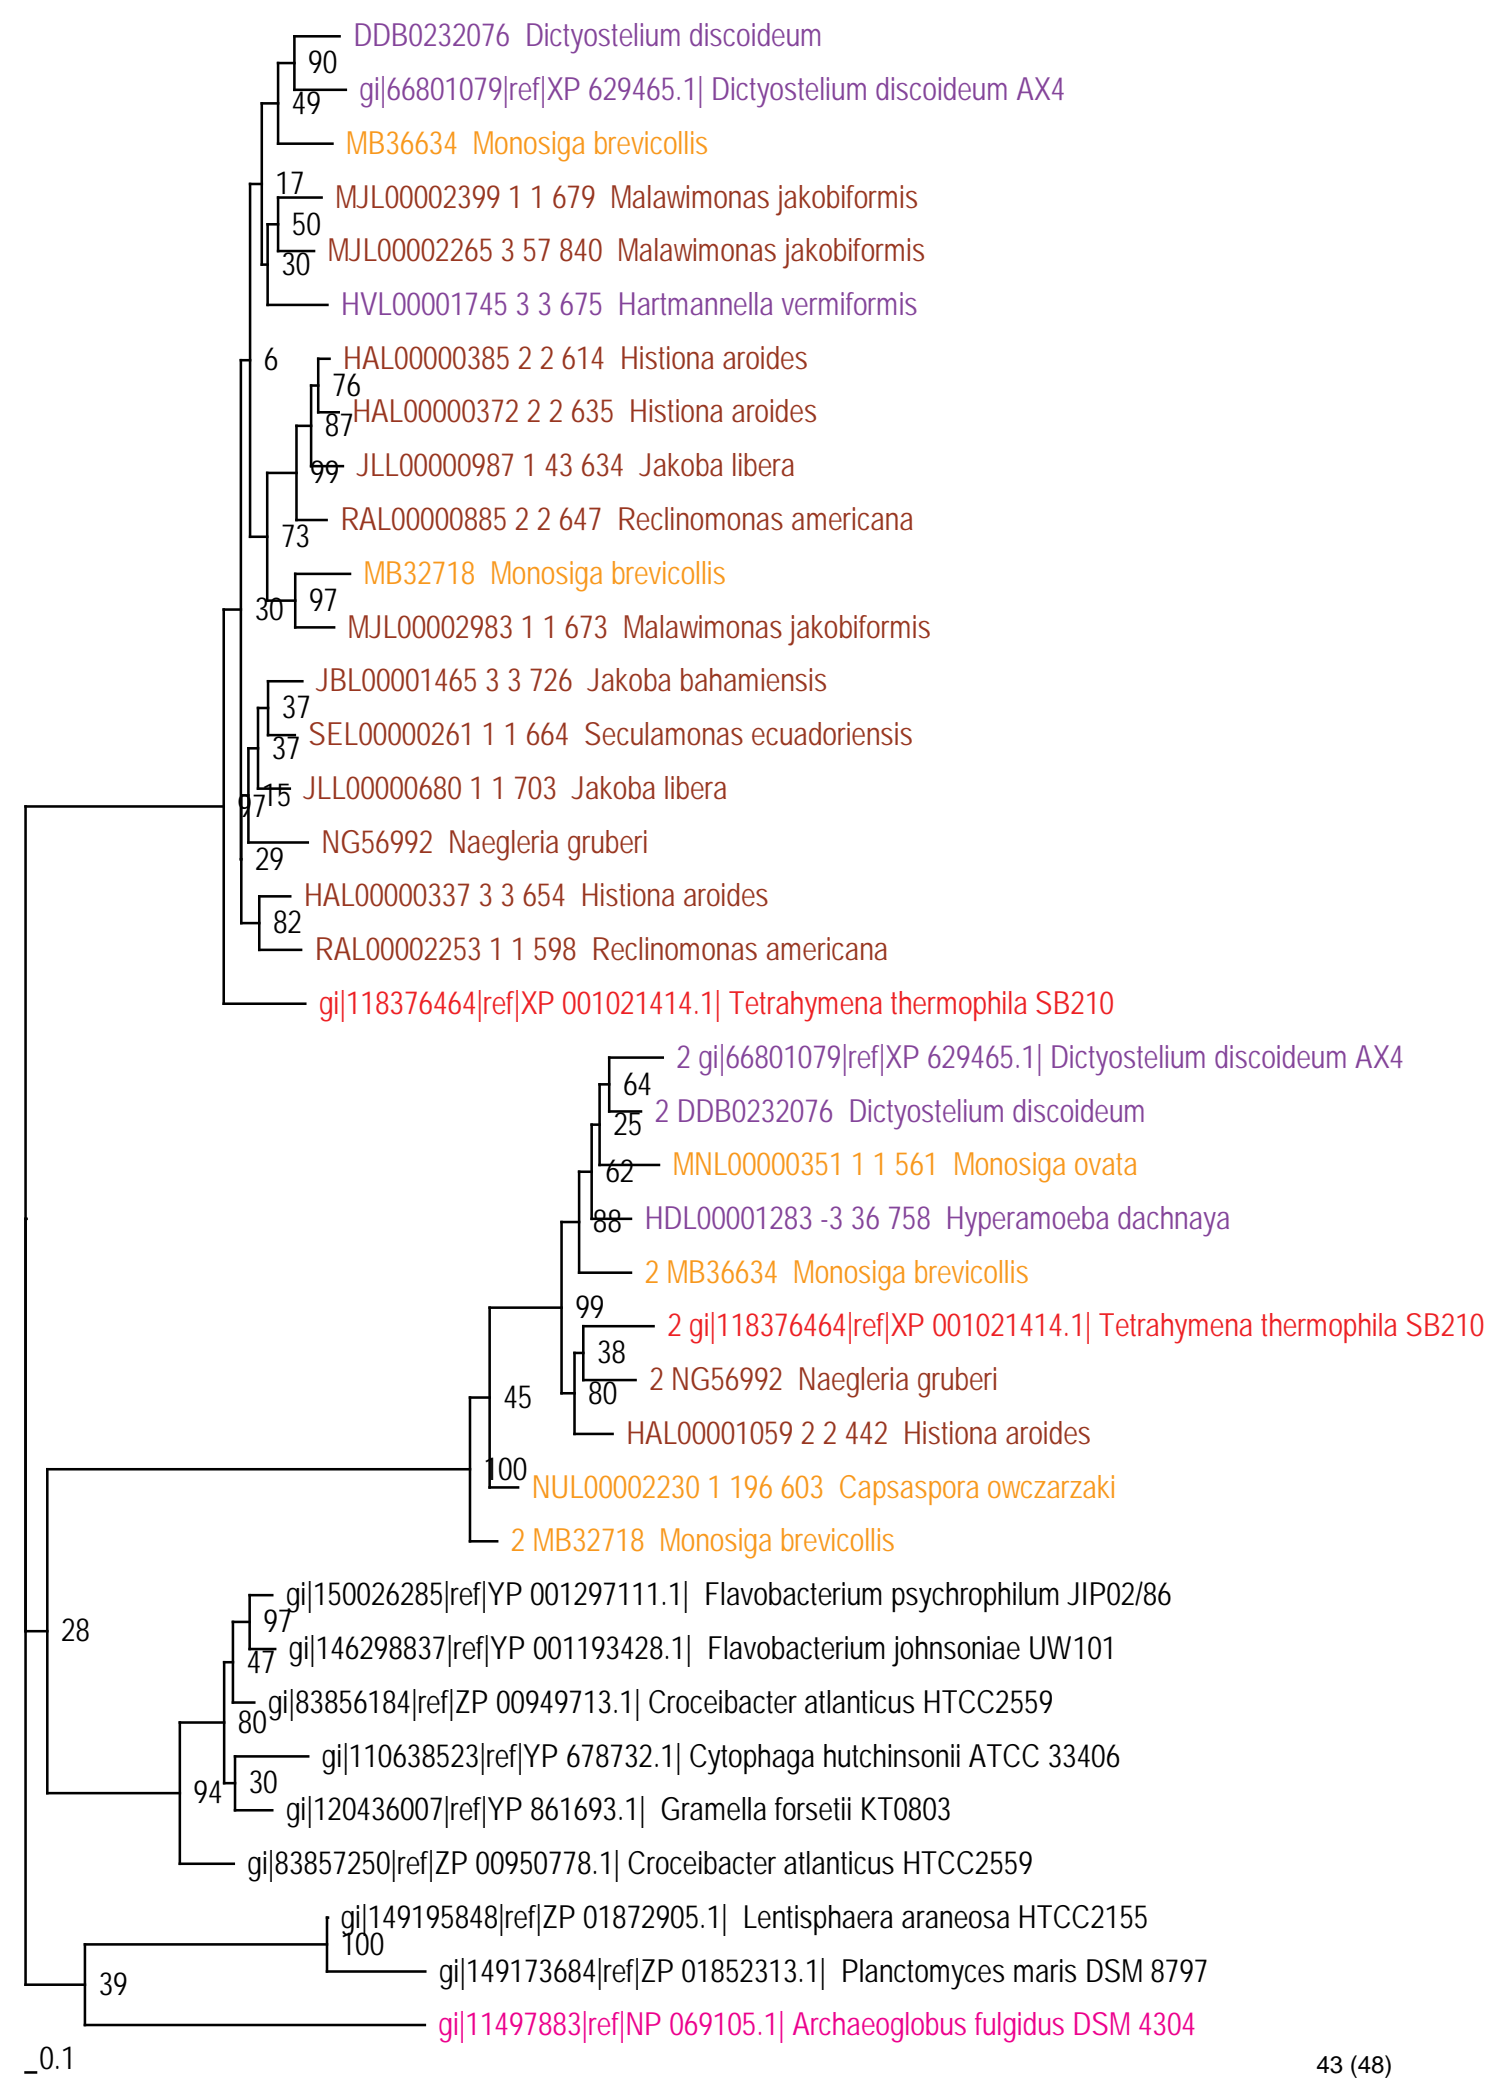

Figure S1BR

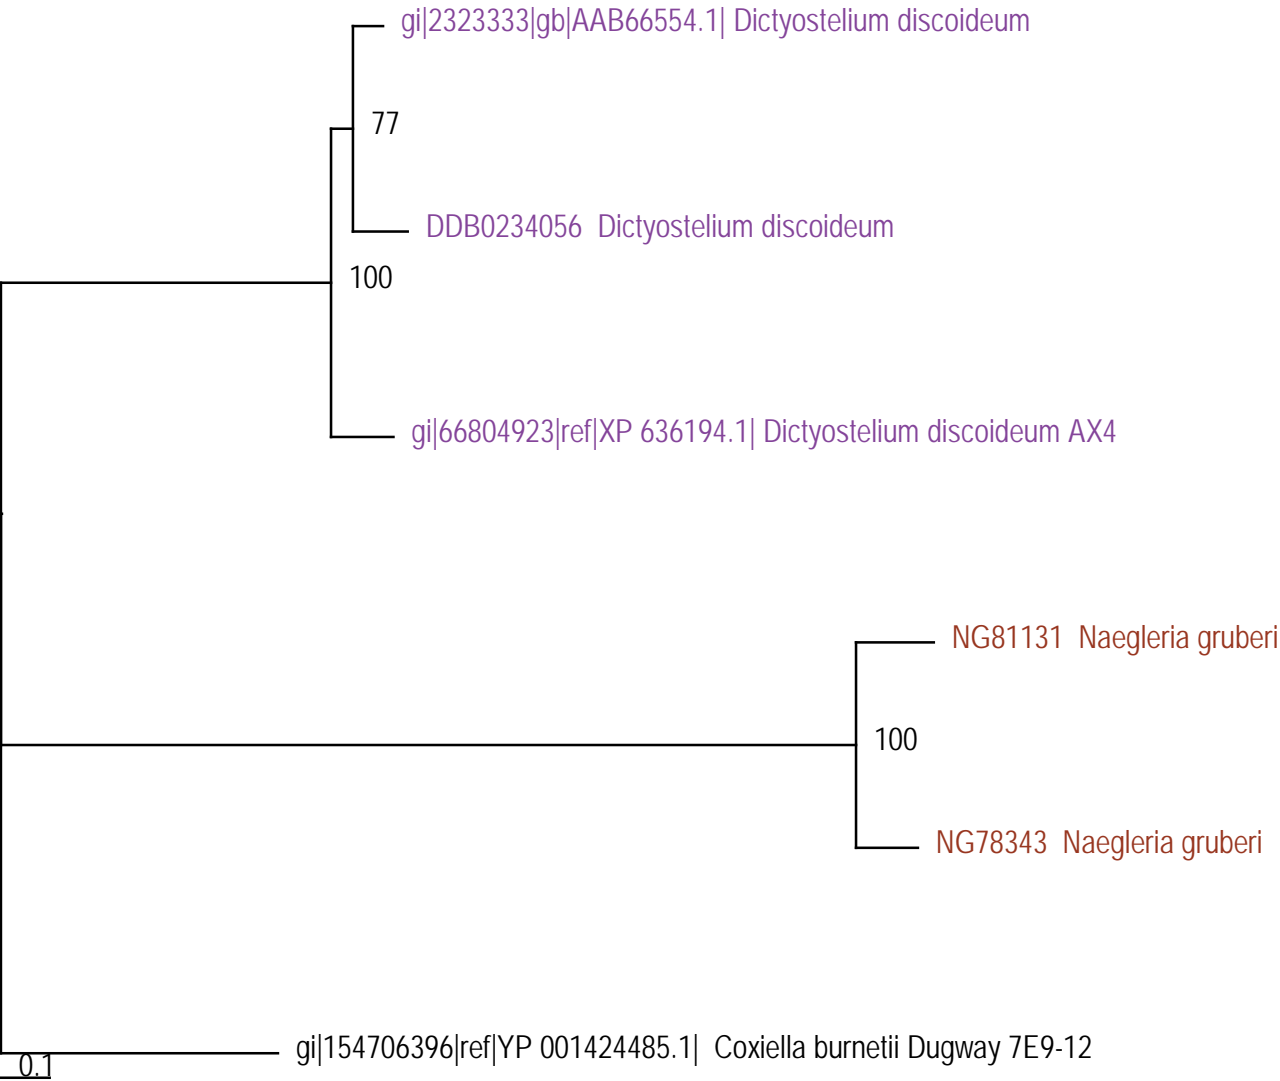

**Figure S1BS**

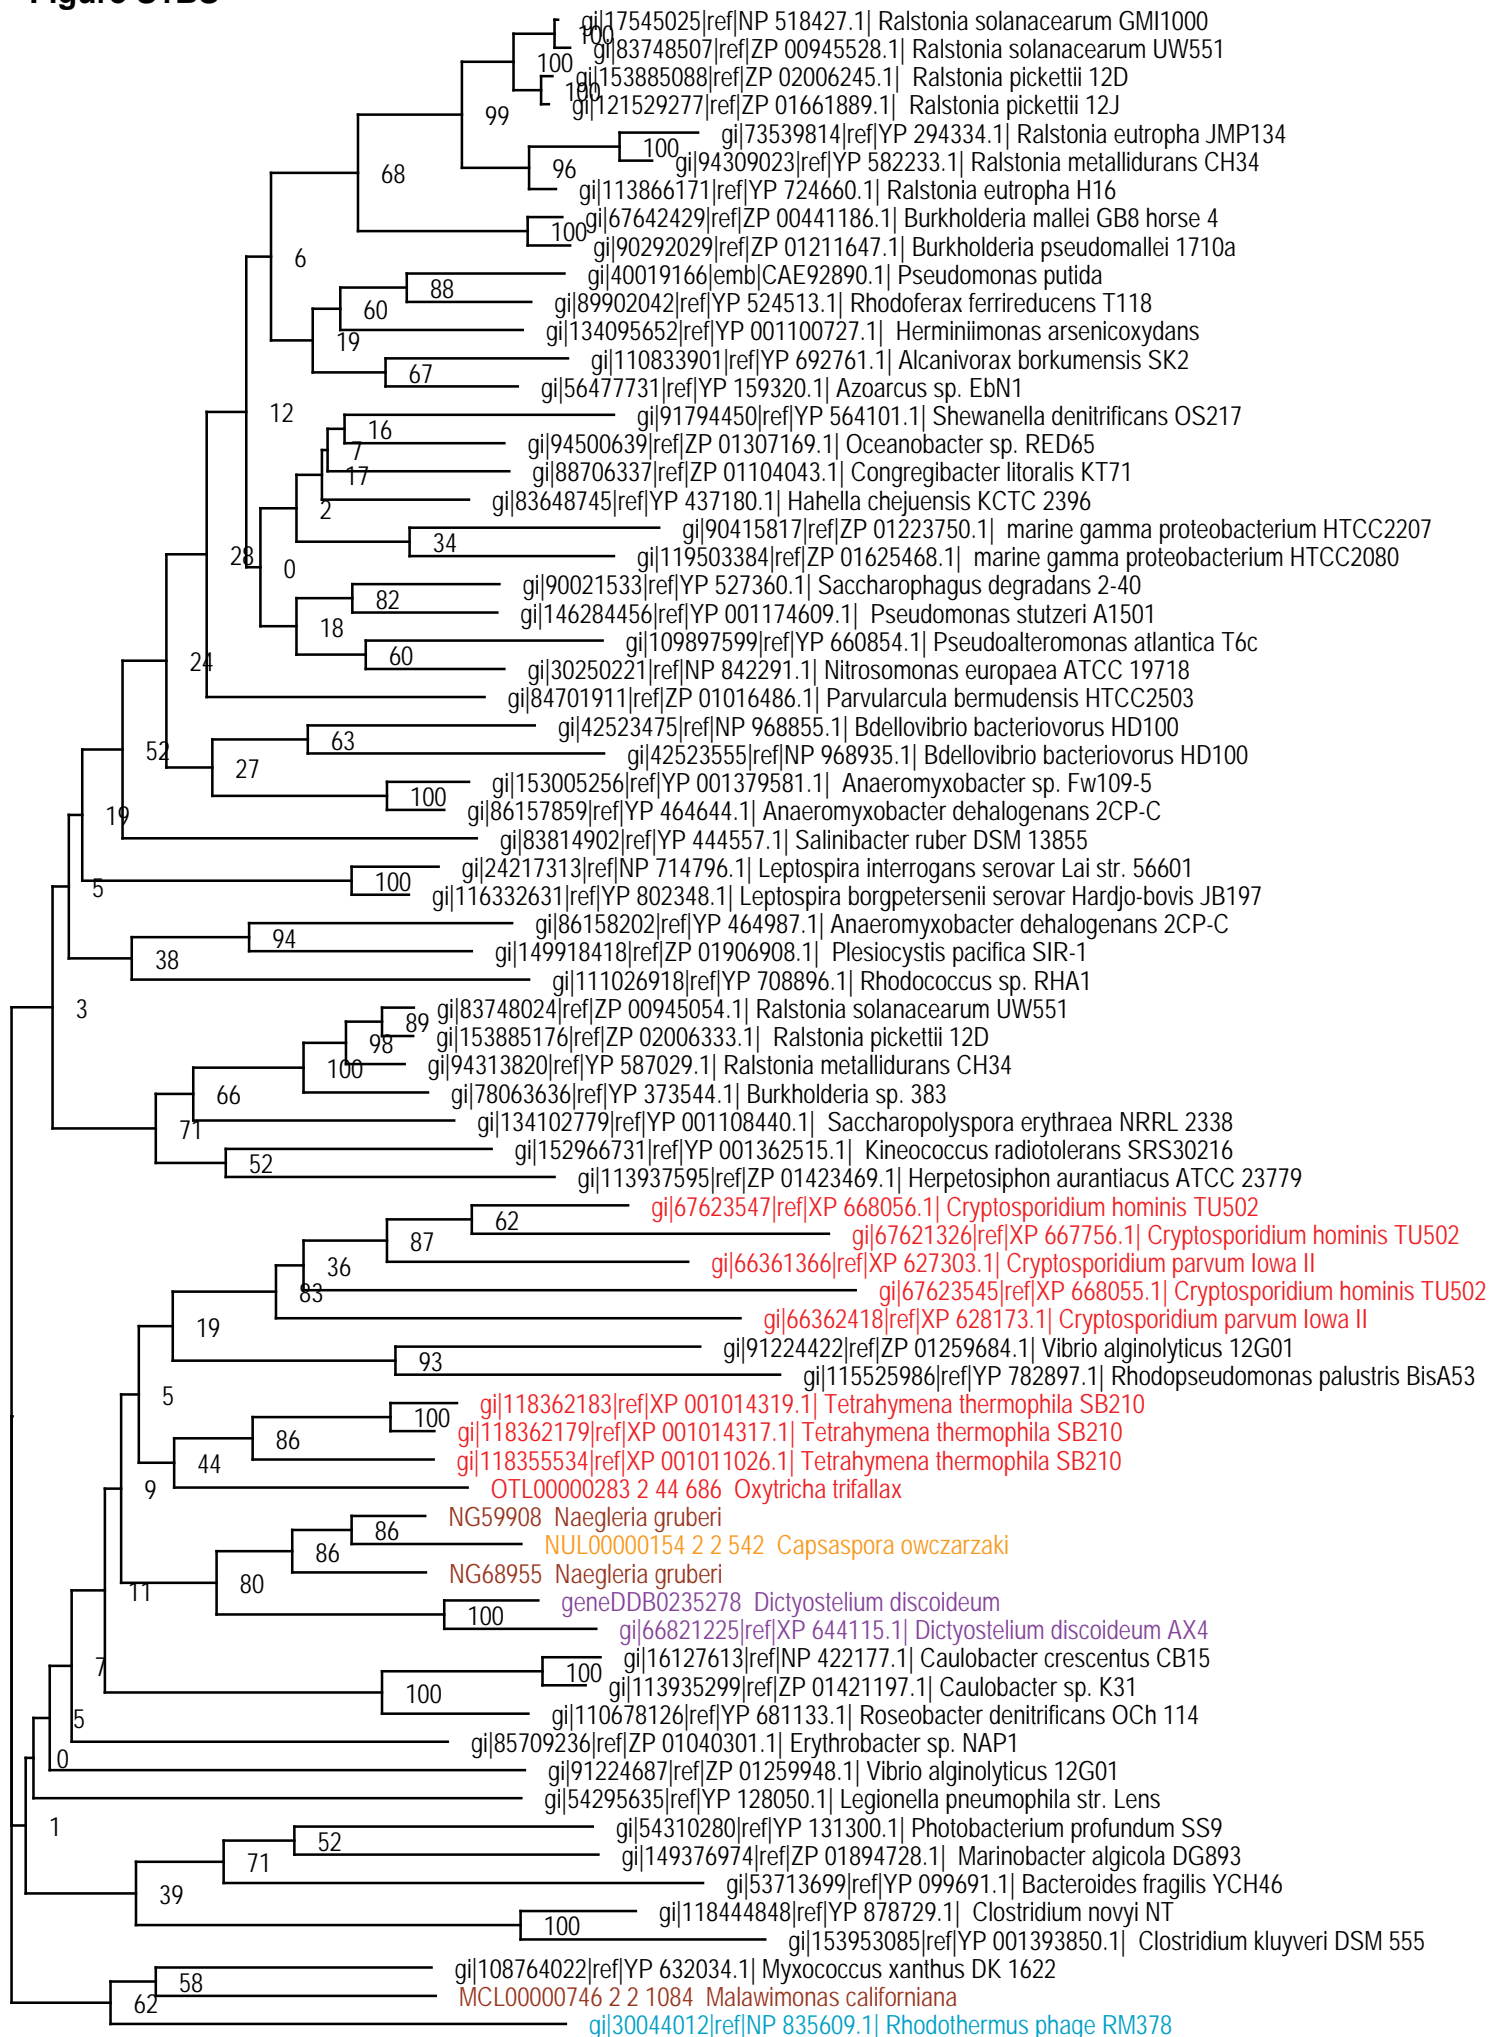

0.1

Figure S1BT

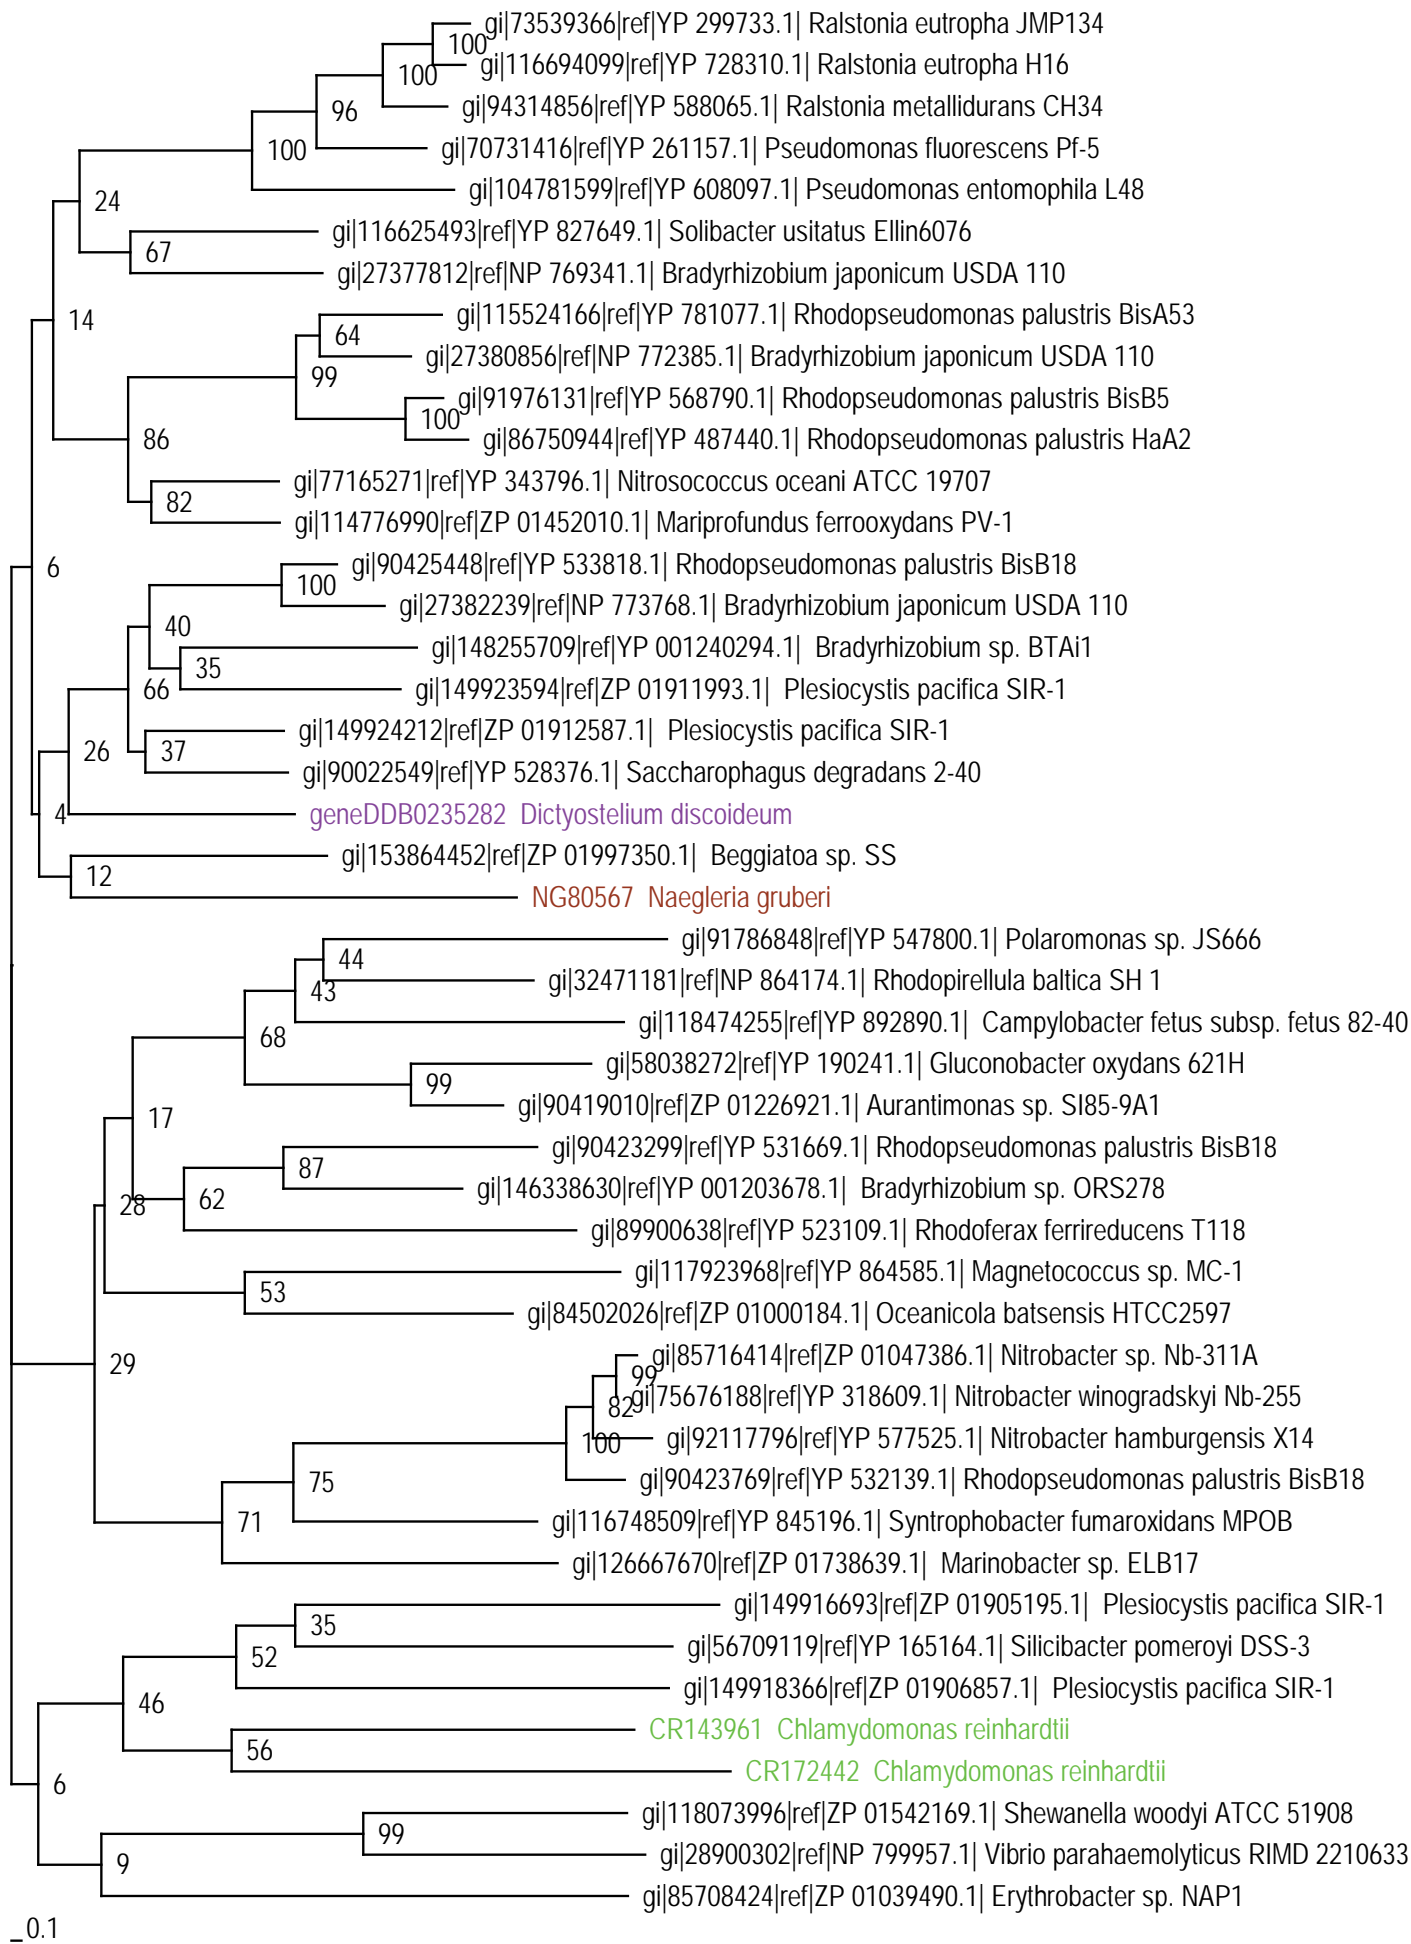

Figure S1BU

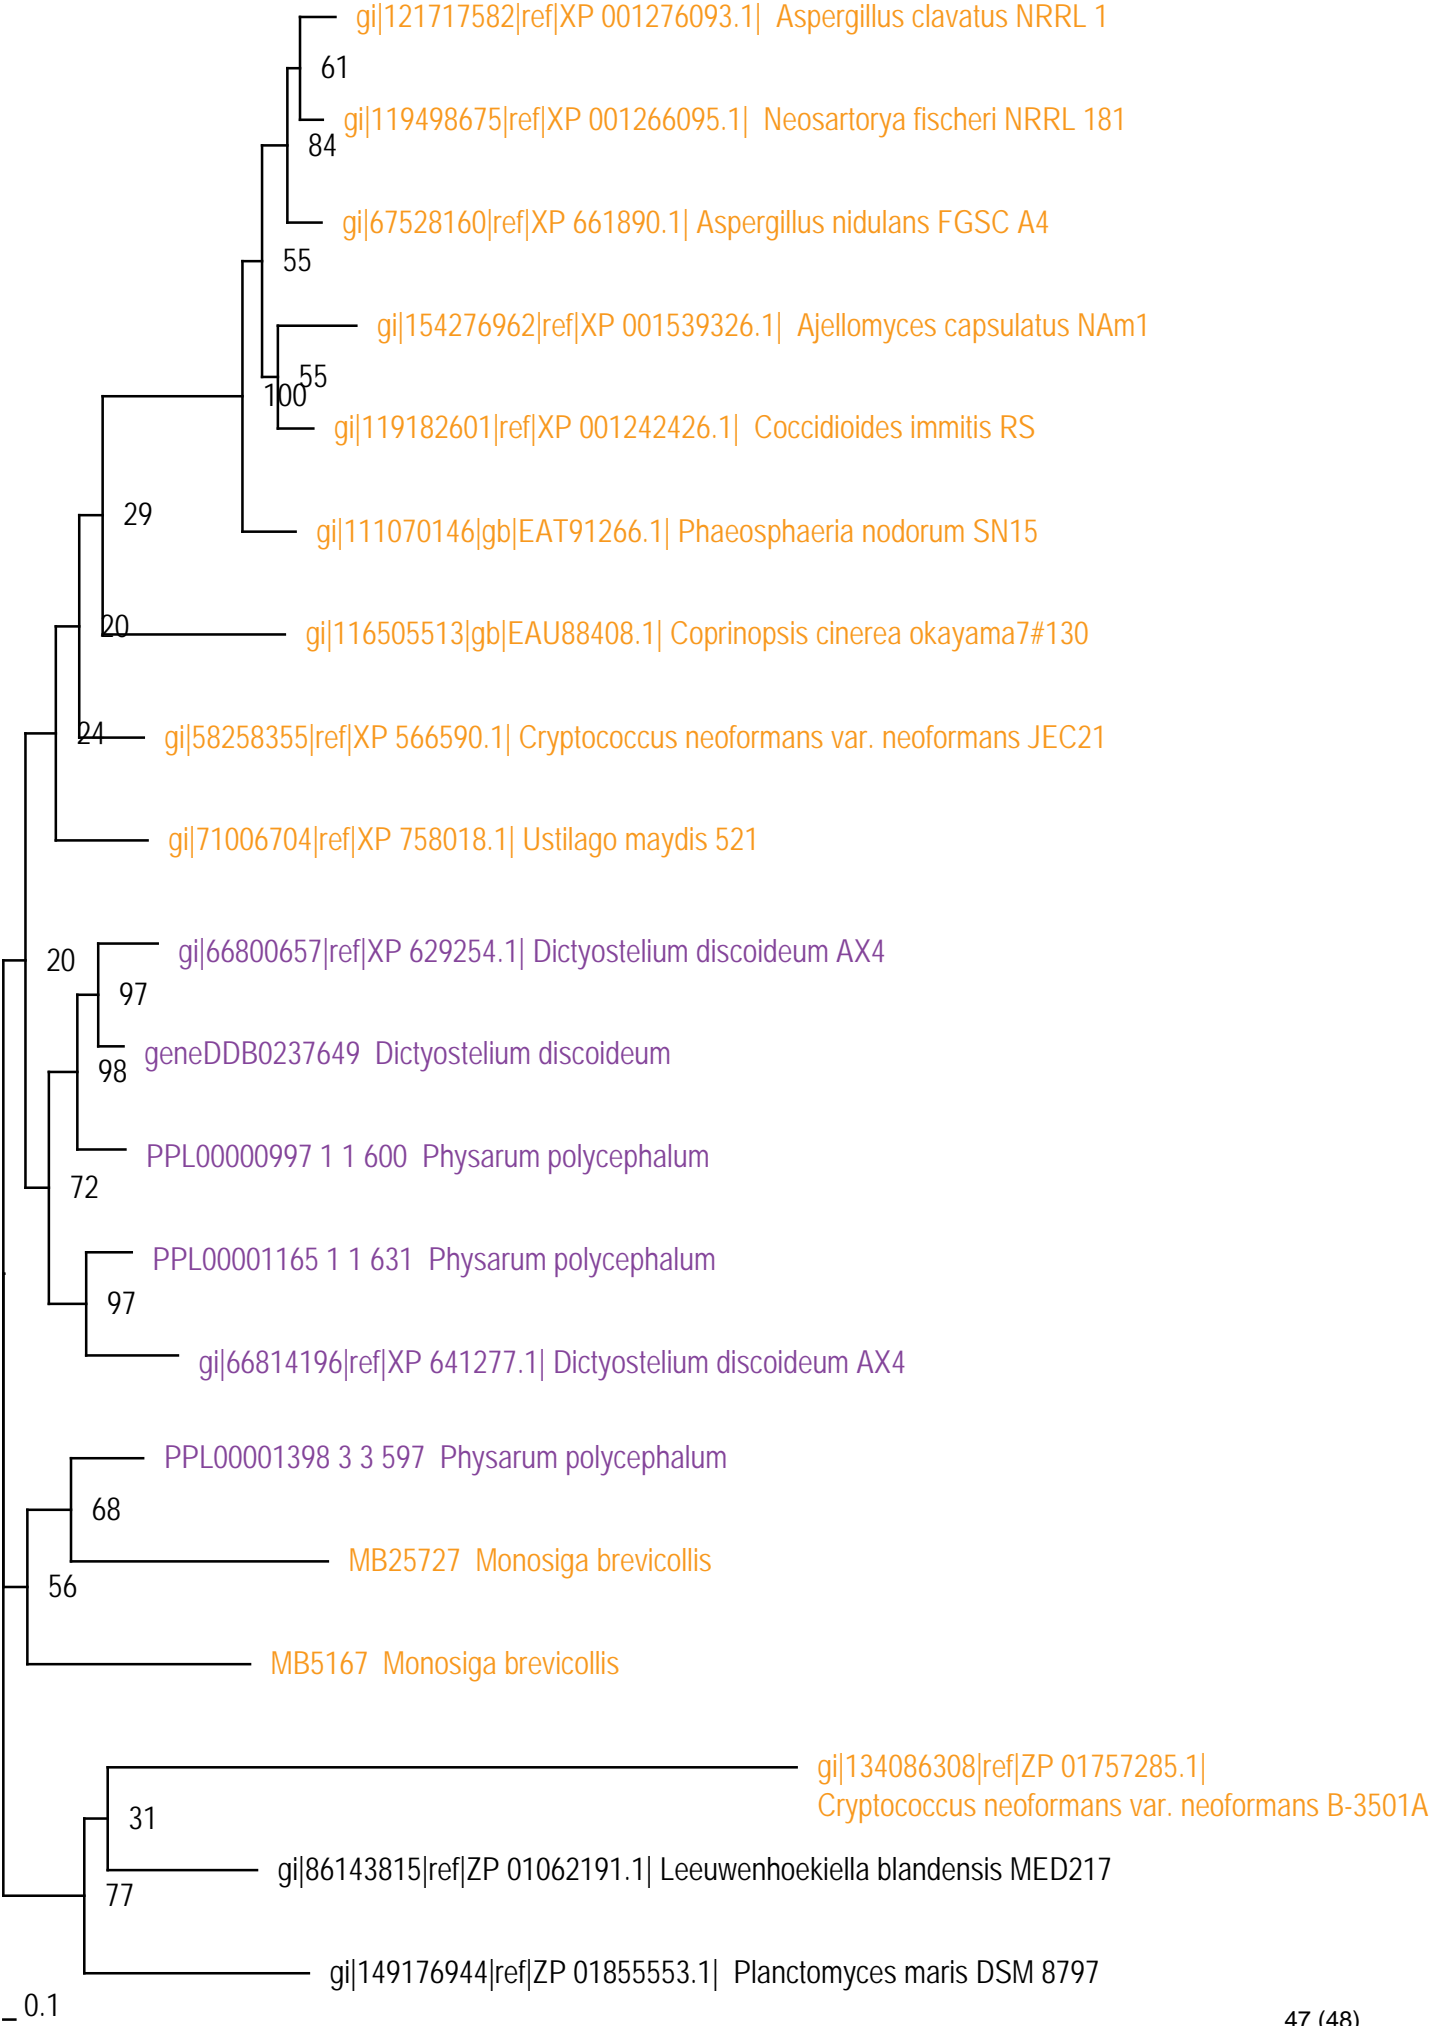



**Figure S1BV**

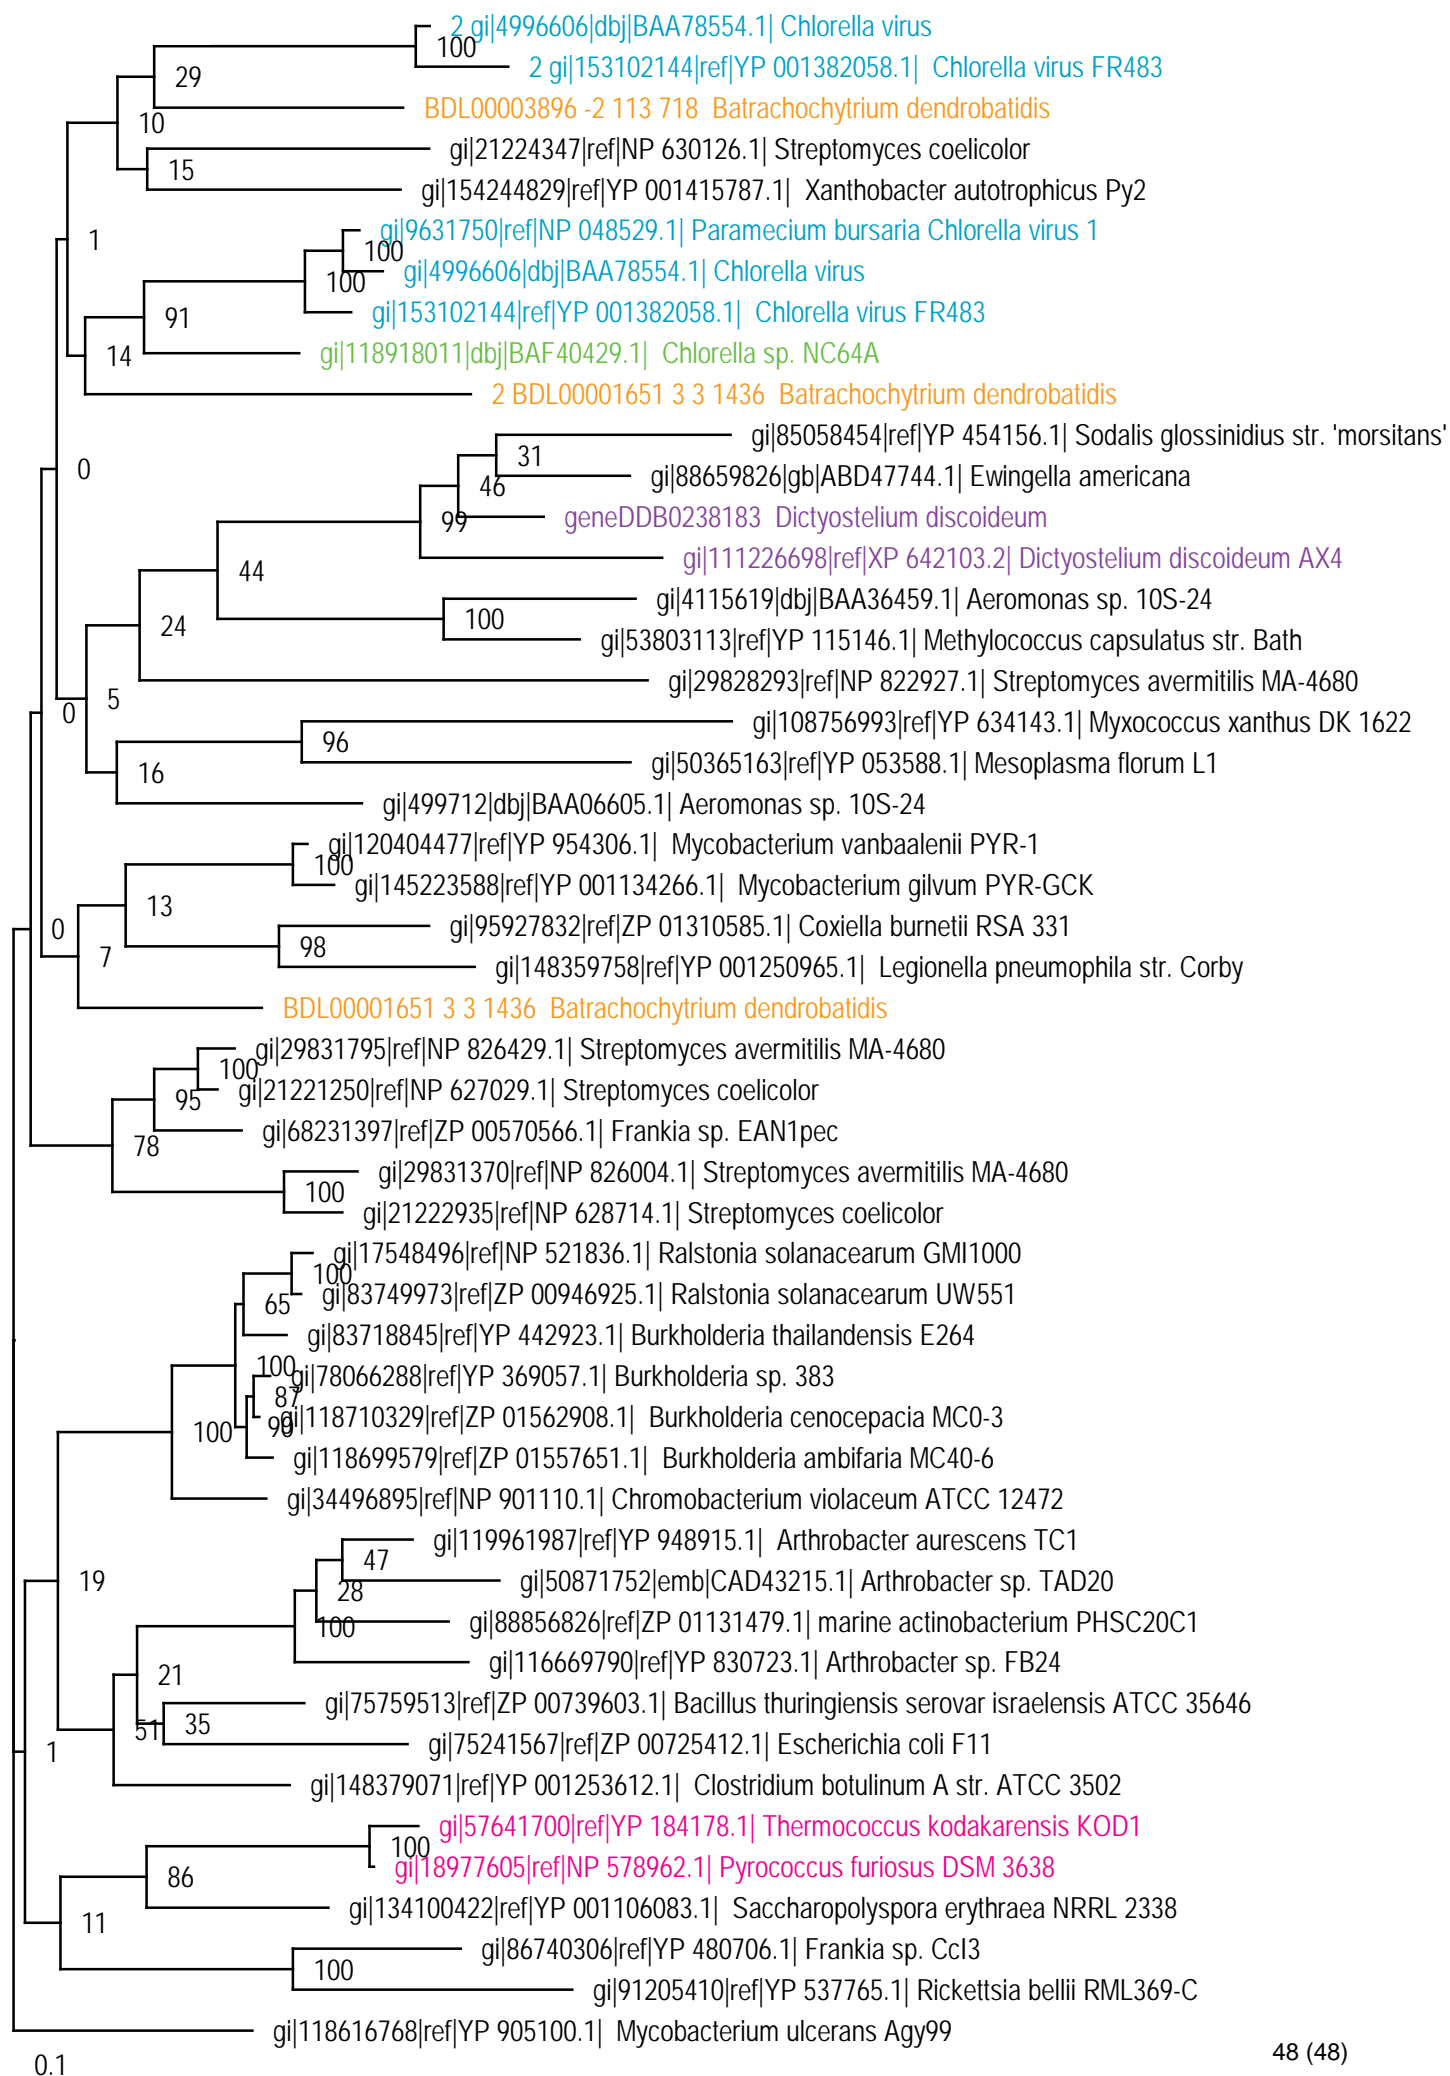

Supplement: Supplementary file 1 [file 1]
