# Supplementary material
Source: publisher figshare collection journal article supplement (https://karger.figshare.com/articles/dataset/_/5121730)

# Evolution of patchily distributed proteins shared between eukaryotes and prokaryotes: Dictyostelium as a case study.

Jan O. Andersson

## Supplementary Figure 2

Correspondance analysis of the relative synonymous codon usage the 49 patchily distributed genes compared to the 9952 *D. discoideum* genes coding for proteins more than 200 amino acids in length.

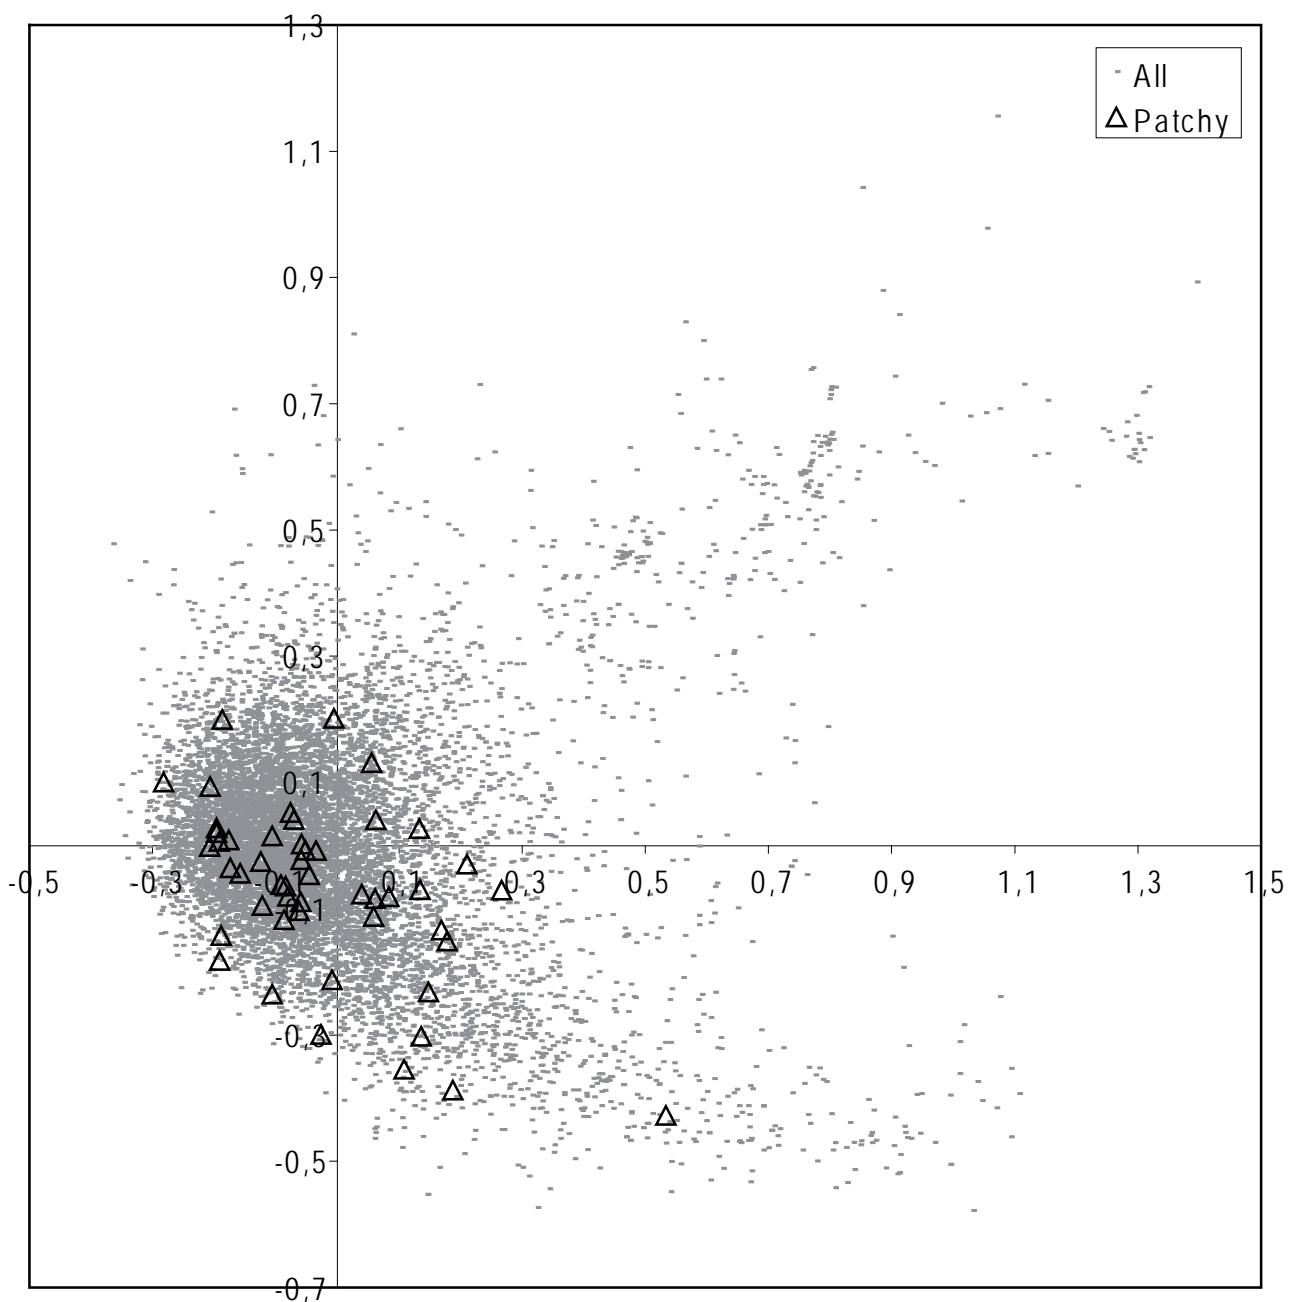

Supplement: Supplementary file 2 [file 1]
