# Supplementary material
Source: publisher figshare collection journal article supplement (https://karger.figshare.com/articles/dataset/_/5121730)
Supplement: Supplementary file 3 [file 1]

# Evolution of patchily distributed proteins shared between eukaryotes and prokaryotes: *Dictyostelium* as a case study.

Jan O. Andersson

## Supplementary Table 1

Complete list of the frequency of occurrence of different genera in the 49 patchily distributed protein families.

| #datasets | Domain <sup>a</sup> | Genus                    | Group                             |
|-----------|---------------------|--------------------------|-----------------------------------|
| 25        | E                   | <i>Naegleria</i>         | Heterolobosea (Excavata)          |
| 12        | E                   | <i>Malawimonas</i>       | Malawimonas (Excavata)            |
| 11        | B                   | <i>Bacteroides</i>       | Bacteroidetes/Chlorobi group      |
| 11        | B                   | <i>Burkholderia</i>      | $\beta$ -Proteobacteria           |
| 11        | B                   | <i>Clostridium</i>       | Firmicutes                        |
| 11        | B                   | <i>Pseudomonas</i>       | $\gamma$ -Proteobacteria          |
| 10        | B                   | <i>Myxococcus</i>        | $\delta$ -Proteobacteria          |
| 10        | E                   | <i>Tetrahymena</i>       | Ciliophora (Chromalveolata)       |
| 9         | B                   | <i>Bacillus</i>          | Firmicutes                        |
| 9         | B                   | <i>Mycobacterium</i>     | Actinobacteria                    |
| 9         | B                   | <i>Stigmatella</i>       | $\delta$ -Proteobacteria          |
| 9         | B                   | <i>Streptomyces</i>      | Actinobacteria                    |
| 9         | B                   | <i>Vibrio</i>            | $\gamma$ -Proteobacteria          |
| 9         | E                   | <i>Gibberella</i>        | Fungi (Opisthokonta)              |
| 9         | E                   | <i>Monosiga</i>          | Choanomonada (Opisthokonta)       |
| 8         | B                   | <i>Frankia</i>           | Actinobacteria                    |
| 8         | B                   | <i>Herpetosiphon</i>     | Chloroflexi                       |
| 8         | B                   | <i>Plesiocystis</i>      | $\delta$ -Proteobacteria          |
| 8         | B                   | <i>Pseudoalteromonas</i> | $\gamma$ -Proteobacteria          |
| 8         | B                   | <i>Ralstonia</i>         | $\beta$ -Proteobacteria           |
| 8         | E                   | <i>Aspergillus</i>       | Fungi (Opisthokonta)              |
| 8         | E                   | <i>Phaeosphaeria</i>     | Fungi (Opisthokonta)              |
| 7         | B                   | <i>Flavobacterium</i>    | Bacteroidetes/Chlorobi group      |
| 7         | B                   | <i>Hahella</i>           | $\gamma$ -Proteobacteria          |
| 7         | B                   | <i>Legionella</i>        | $\gamma$ -Proteobacteria          |
| 7         | B                   | <i>Saccharopolyspora</i> | Actinobacteria                    |
| 7         | B                   | <i>Shewanella</i>        | $\gamma$ -Proteobacteria          |
| 7         | E                   | <i>Hartmannella</i>      | Tubulinea (Amoebozoa)             |
| 6         | B                   | <i>Bradyrhizobium</i>    | $\alpha$ -Proteobacteria          |
| 6         | B                   | <i>Chromobacterium</i>   | $\beta$ -Proteobacteria           |
| 6         | B                   | <i>Planctomyces</i>      | Planctomycetes                    |
| 6         | B                   | <i>Rhodopirellula</i>    | Planctomycetes                    |
| 6         | E                   | <i>Chaetomium</i>        | Fungi (Opisthokonta)              |
| 6         | E                   | <i>Histiona</i>          | Jakobida (Excavata)               |
| 6         | V                   | <i>Paramecium</i>        | Phycodnaviridae                   |
| 5         | B                   | <i>Acidobacteria</i>     | Fibrobacteres/Acidobacteria group |
| 5         | B                   | <i>Candidatus</i>        | Planctomycetes                    |
| 5         | B                   | <i>Escherichia</i>       | $\gamma$ -Proteobacteria          |
| 5         | B                   | <i>Geobacter</i>         | $\delta$ -Proteobacteria          |

|   |   |                           |                                   |
|---|---|---------------------------|-----------------------------------|
| 5 | B | <i>Lactobacillus</i>      | Firmicutes                        |
| 5 | B | <i>marine</i>             | Actinobacteria                    |
| 5 | B | <i>Microscilla</i>        | Bacteroidetes/Chlorobi group      |
| 5 | B | <i>Nocardioides</i>       | Actinobacteria                    |
| 5 | B | <i>Photobacterium</i>     | $\gamma$ -Proteobacteria          |
| 5 | B | <i>Rhodopseudomonas</i>   | $\alpha$ -Proteobacteria          |
| 5 | B | <i>Saccharophagus</i>     | $\gamma$ -Proteobacteria          |
| 5 | B | <i>Salinispora</i>        | Actinobacteria                    |
| 5 | B | <i>uncultured</i>         | environmental samples             |
| 5 | E | <i>Acanthamoeba</i>       | Acanthamoebidae (Amoebozoa)       |
| 5 | E | <i>Arabidopsis</i>        | Land plants (Archaeplastida)      |
| 5 | E | <i>Chlamydomonas</i>      | Green algae (Archaeplastida)      |
| 5 | E | <i>Coccidioides</i>       | Fungi (Opisthokonta)              |
| 5 | E | <i>Jakoba</i>             | Jakobida (Excavata)               |
| 5 | E | <i>Leishmania</i>         | Euglenozoa (Excavata)             |
| 5 | E | <i>Neurospora</i>         | Fungi (Opisthokonta)              |
| 5 | E | <i>Ostreococcus</i>       | Green algae (Archaeplastida)      |
| 5 | E | <i>Paramecium</i>         | Ciliophora (Chromalveolata)       |
| 5 | E | <i>Physarum</i>           | Eumycetozoa (Amoebozoa)           |
| 5 | E | <i>Phytophthora</i>       | Oomycetes (Chromalveolata)        |
| 5 | E | <i>Reclinomonas</i>       | Jakobida (Excavata)               |
| 4 | A | <i>Methanococcus</i>      | Euryarchaeota                     |
| 4 | B | <i>Aeromonas</i>          | $\gamma$ -Proteobacteria          |
| 4 | B | <i>Arthrobacter</i>       | Actinobacteria                    |
| 4 | B | <i>Blastopirellula</i>    | Planctomycetes                    |
| 4 | B | <i>Caulobacter</i>        | $\alpha$ -Proteobacteria          |
| 4 | B | <i>Fervidobacterium</i>   | Thermotogae                       |
| 4 | B | <i>Francisella</i>        | $\gamma$ -Proteobacteria          |
| 4 | B | <i>Methylobacterium</i>   | $\alpha$ -Proteobacteria          |
| 4 | B | <i>Roseobacter</i>        | $\alpha$ -Proteobacteria          |
| 4 | B | <i>Ruminococcus</i>       | Firmicutes                        |
| 4 | B | <i>Silicibacter</i>       | $\alpha$ -Proteobacteria          |
| 4 | B | <i>Solibacter</i>         | Fibrobacteres/Acidobacteria group |
| 4 | B | <i>Synechococcus</i>      | Cyanobacteria                     |
| 4 | B | <i>unidentified</i>       | Bacteroidetes/Chlorobi group      |
| 4 | B | <i>Xanthomonas</i>        | $\gamma$ -Proteobacteria          |
| 4 | E | <i>Ajellomyces</i>        | Fungi (Opisthokonta)              |
| 4 | E | <i>Hyperamoeba</i>        | Eumycetozoa (Amoebozoa)           |
| 4 | E | <i>Magnaporthe</i>        | Fungi (Opisthokonta)              |
| 4 | E | <i>Neosartorya</i>        | Fungi (Opisthokonta)              |
| 4 | E | <i>Thalassiosira</i>      | Diatoms (Chromalveolata)          |
| 4 | E | <i>Trichomonas</i>        | Parabasalids (Excavata)           |
| 4 | E | <i>Trypanosoma</i>        | Euglenozoa (Excavata)             |
| 3 | A | <i>Methanosarcina</i>     | Euryarchaeota                     |
| 3 | A | <i>Natronomonas</i>       | Euryarchaeota                     |
| 3 | B | <i>Alteromonas</i>        | $\gamma$ -Proteobacteria          |
| 3 | B | <i>Anaeromyxobacter</i>   | $\delta$ -Proteobacteria          |
| 3 | B | <i>Azoarcus</i>           | $\beta$ -Proteobacteria           |
| 3 | B | <i>Bdellovibrio</i>       | $\delta$ -Proteobacteria          |
| 3 | B | <i>Campylobacter</i>      | $\epsilon$ -Proteobacteria        |
| 3 | B | <i>Coxiella</i>           | $\gamma$ -Proteobacteria          |
| 3 | B | <i>Deinococcus</i>        | Deinococcus-Thermus               |
| 3 | B | <i>Desulfitobacterium</i> | Firmicutes                        |
| 3 | B | <i>Dorea</i>              | Firmicutes                        |
| 3 | B | <i>Enterobacter</i>       | $\gamma$ -Proteobacteria          |
| 3 | B | <i>Erythrobacter</i>      | $\alpha$ -Proteobacteria          |

|   |   |                           |                                  |
|---|---|---------------------------|----------------------------------|
| 3 | B | <i>Exiguobacterium</i>    | Firmicutes                       |
| 3 | B | <i>Flavobacteriales</i>   | Bacteroidetes/Chlorobi group     |
| 3 | B | <i>Fusobacterium</i>      | Fusobacteria                     |
| 3 | B | <i>Gramella</i>           | Bacteroidetes/Chlorobi group     |
| 3 | B | <i>Janibacter</i>         | Actinobacteria                   |
| 3 | B | <i>Lentisphaera</i>       | Chlamydiae/Verrucomicrobia group |
| 3 | B | <i>Leptospira</i>         | Spirochaetes                     |
| 3 | B | <i>Marinobacter</i>       | $\gamma$ -Proteobacteria         |
| 3 | B | <i>Marinomonas</i>        | $\gamma$ -Proteobacteria         |
| 3 | B | <i>Nitrobacter</i>        | $\alpha$ -Proteobacteria         |
| 3 | B | <i>Nostoc</i>             | Cyanobacteria                    |
| 3 | B | <i>Oceanobacillus</i>     | Firmicutes                       |
| 3 | B | <i>Oceanobacter</i>       | $\gamma$ -Proteobacteria         |
| 3 | B | <i>Opitutaceae</i>        | Chlamydiae/Verrucomicrobia group |
| 3 | B | <i>Polaribacter</i>       | Bacteroidetes/Chlorobi group     |
| 3 | B | <i>Prochlorococcus</i>    | Cyanobacteria                    |
| 3 | B | <i>Psychroflexus</i>      | Bacteroidetes/Chlorobi group     |
| 3 | B | <i>Rhodococcus</i>        | Actinobacteria                   |
| 3 | B | <i>Rhodoferax</i>         | $\beta$ -Proteobacteria          |
| 3 | B | <i>Roseovarius</i>        | $\alpha$ -Proteobacteria         |
| 3 | B | <i>Serratia</i>           | $\gamma$ -Proteobacteria         |
| 3 | B | <i>Stenotrophomonas</i>   | $\gamma$ -Proteobacteria         |
| 3 | B | <i>Thermobifida</i>       | Actinobacteria                   |
| 3 | B | <i>Thermotoga</i>         | Thermotogae                      |
| 3 | B | <i>Xanthobacter</i>       | $\alpha$ -Proteobacteria         |
| 3 | B | <i>Yersinia</i>           | $\gamma$ -Proteobacteria         |
| 3 | E | <i>Botryotinia</i>        | Fungi (Opisthokonta)             |
| 3 | E | <i>Cryptococcus</i>       | Fungi (Opisthokonta)             |
| 3 | E | <i>Euglena</i>            | Euglenozoa (Excavata)            |
| 3 | E | <i>Mastigamoeba</i>       | Pelobionts (Amoebozoa)           |
| 3 | E | <i>Oryza</i>              | Land plants (Archaeplastida)     |
| 3 | E | <i>Phaeodactylum</i>      | Diatoms (Chromalveolata)         |
| 3 | E | <i>Plasmodium</i>         | Apicomplexa (Chromalveolata)     |
| 3 | E | <i>Seculamonas</i>        | Jakobida (Excavata)              |
| 3 | E | <i>Tetraodon</i>          | Animals (Opisthokonta)           |
| 3 | E | <i>Vitis</i>              | Land plants (Archaeplastida)     |
| 3 | V | <i>Acanthamoeba</i>       | Mimivirus                        |
| 3 | V | <i>Aeromonas</i>          | Caudovirales                     |
| 2 | A | <i>Halobacterium</i>      | Euryarchaeota                    |
| 2 | A | <i>Halorubrum</i>         | Euryarchaeota                    |
| 2 | A | <i>Methanocaldococcus</i> | Euryarchaeota                    |
| 2 | A | <i>Pyrococcus</i>         | Euryarchaeota                    |
| 2 | A | <i>Thermococcus</i>       | Euryarchaeota                    |
| 2 | B | <i>Acinetobacter</i>      | $\gamma$ -Proteobacteria         |
| 2 | B | <i>Agrobacterium</i>      | $\alpha$ -Proteobacteria         |
| 2 | B | <i>Alcanivorax</i>        | $\gamma$ -Proteobacteria         |
| 2 | B | <i>Algoriphagus</i>       | Bacteroidetes/Chlorobi group     |
| 2 | B | <i>Alkaliphilus</i>       | Firmicutes                       |
| 2 | B | <i>Alteromonadales</i>    | $\gamma$ -Proteobacteria         |
| 2 | B | <i>Anabaena</i>           | Cyanobacteria                    |
| 2 | B | <i>Azotobacter</i>        | $\gamma$ -Proteobacteria         |
| 2 | B | <i>Beggiatoa</i>          | $\gamma$ -Proteobacteria         |
| 2 | B | <i>Bordetella</i>         | $\beta$ -Proteobacteria          |
| 2 | B | <i>Brevibacterium</i>     | Actinobacteria                   |
| 2 | B | <i>Butyrivibrio</i>       | Firmicutes                       |
| 2 | B | <i>Clavibacter</i>        | Actinobacteria                   |

|   |   |                         |                                  |
|---|---|-------------------------|----------------------------------|
| 2 | B | <i>Corynebacterium</i>  | Actinobacteria                   |
| 2 | B | <i>Croceibacter</i>     | Bacteroidetes/Chlorobi group     |
| 2 | B | <i>Crocospaera</i>      | Cyanobacteria                    |
| 2 | B | <i>Cyanothece</i>       | Cyanobacteria                    |
| 2 | B | <i>Cytophaga</i>        | Bacteroidetes/Chlorobi group     |
| 2 | B | <i>Desulfotalea</i>     | $\delta$ -Proteobacteria         |
| 2 | B | <i>Dokdonia</i>         | Bacteroidetes/Chlorobi group     |
| 2 | B | <i>Enterococcus</i>     | Firmicutes                       |
| 2 | B | <i>Flavobacteria</i>    | Bacteroidetes/Chlorobi group     |
| 2 | B | <i>Halothermothrix</i>  | Firmicutes                       |
| 2 | B | <i>Herminiimonas</i>    | $\beta$ -Proteobacteria          |
| 2 | B | <i>Hyphomonas</i>       | $\alpha$ -Proteobacteria         |
| 2 | B | <i>Kineococcus</i>      | Actinobacteria                   |
| 2 | B | <i>Klebsiella</i>       | $\gamma$ -Proteobacteria         |
| 2 | B | <i>Leeuwenhoekiella</i> | Bacteroidetes/Chlorobi group     |
| 2 | B | <i>Limnobacter</i>      | $\beta$ -Proteobacteria          |
| 2 | B | <i>Lyngbya</i>          | Cyanobacteria                    |
| 2 | B | <i>Magnetococcus</i>    | Proteobacteria                   |
| 2 | B | <i>Mariprofundus</i>    | Proteobacteria                   |
| 2 | B | <i>Mesorhizobium</i>    | $\alpha$ -Proteobacteria         |
| 2 | B | <i>Methylococcus</i>    | $\gamma$ -Proteobacteria         |
| 2 | B | <i>Nitrosococcus</i>    | $\gamma$ -Proteobacteria         |
| 2 | B | <i>Nocardia</i>         | Actinobacteria                   |
| 2 | B | <i>Oceanicaulis</i>     | $\alpha$ -Proteobacteria         |
| 2 | B | <i>Pediococcus</i>      | Firmicutes                       |
| 2 | B | <i>Pedobacter</i>       | Bacteroidetes/Chlorobi group     |
| 2 | B | <i>Polaromonas</i>      | $\beta$ -Proteobacteria          |
| 2 | B | <i>Porphyromonas</i>    | Bacteroidetes/Chlorobi group     |
| 2 | B | <i>Robiginitalea</i>    | Bacteroidetes/Chlorobi group     |
| 2 | B | <i>Roseiflexus</i>      | Chloroflexi                      |
| 2 | B | <i>Rubrobacter</i>      | Actinobacteria                   |
| 2 | B | <i>Salinibacter</i>     | Bacteroidetes/Chlorobi group     |
| 2 | B | <i>Stappia</i>          | $\alpha$ -Proteobacteria         |
| 2 | B | <i>Streptococcus</i>    | Firmicutes                       |
| 2 | B | <i>Syntrophobacter</i>  | $\delta$ -Proteobacteria         |
| 2 | B | <i>Thermosinus</i>      | Firmicutes                       |
| 2 | B | <i>Thermosipho</i>      | Thermotogae                      |
| 2 | B | <i>Thermus</i>          | Deinococcus-Thermus              |
| 2 | B | <i>Trichodesmium</i>    | Cyanobacteria                    |
| 2 | B | <i>Vibrionales</i>      | $\gamma$ -Proteobacteria         |
| 2 | B | <i>Victivallis</i>      | Chlamydiae/Verrucomicrobia group |
| 2 | B | <i>Xylella</i>          | $\gamma$ -Proteobacteria         |
| 2 | E | <i>Batrachochytrium</i> | Fungi (Opisthokonta)             |
| 2 | E | <i>Bigelowiella</i>     | Cercozoa (Rhizaria)              |
| 2 | E | <i>Capsaspora</i>       | Ichthyosporea (Opisthokonta)     |
| 2 | E | <i>Coprinopsis</i>      | Fungi (Opisthokonta)             |
| 2 | E | <i>Cryptosporidium</i>  | Apicomplexa (Chromalveolata)     |
| 2 | E | <i>Danio</i>            | Animals (Opisthokonta)           |
| 2 | E | <i>Entamoeba</i>        | Entamoebidae (Amoebozoa)         |
| 2 | E | <i>Guillardia</i>       | Cryptomonads (Chromalveolata)    |
| 2 | E | <i>Medicago</i>         | Land plants (Archaeplastida)     |
| 2 | E | <i>Mus</i>              | Animals (Opisthokonta)           |
| 2 | E | <i>Pavlova</i>          | Haptophytes (Chromalveolata)     |
| 2 | E | <i>Rattus</i>           | Animals (Opisthokonta)           |
| 2 | E | <i>Sawyeria</i>         | Heterolobosea (Excavata)         |
| 2 | E | <i>Sclerotinia</i>      | Fungi (Opisthokonta)             |

|   |   |                             |                               |
|---|---|-----------------------------|-------------------------------|
| 2 | E | <i>Trimastix</i>            | Preaxostyla (Excavata)        |
| 2 | V | <i>Antheraea</i>            | Baculoviridae                 |
| 2 | V | <i>Enterobacteria</i>       | Caudovirales                  |
| 2 | V | <i>Listeria</i>             | Caudovirales                  |
| 2 | V | <i>Spodoptera</i>           | Baculoviridae                 |
| 2 | V | <i>Vibrio</i>               | Caudovirales                  |
| 1 | A | <i>Archaeoglobus</i>        | Euryarchaeota                 |
| 1 | A | <i>Ferroplasma</i>          | Euryarchaeota                 |
| 1 | A | <i>Haloarcula</i>           | Euryarchaeota                 |
| 1 | A | <i>Methanobrevibacter</i>   | Euryarchaeota                 |
| 1 | A | <i>Methanocorpusculum</i>   | Euryarchaeota                 |
| 1 | A | <i>Methanoculleus</i>       | Euryarchaeota                 |
| 1 | A | <i>Methanopyrus</i>         | Euryarchaeota                 |
| 1 | A | <i>Methanosphaera</i>       | Euryarchaeota                 |
| 1 | A | <i>Methanospirillum</i>     | Euryarchaeota                 |
| 1 | A | <i>Methanothermobacter</i>  | Euryarchaeota                 |
| 1 | A | <i>Methanothermus</i>       | Euryarchaeota                 |
| 1 | A | <i>Picrophilus</i>          | Euryarchaeota                 |
| 1 | A | <i>Sulfolobus</i>           | Crenarchaeota                 |
| 1 | A | <i>Thermoplasma</i>         | Euryarchaeota                 |
| 1 | B | <i>Acidiphilium</i>         | $\alpha$ -Proteobacteria      |
| 1 | B | <i>Actinobacillus</i>       | $\gamma$ -Proteobacteria      |
| 1 | B | <i>Actinomyces</i>          | Actinobacteria                |
| 1 | B | <i>alpha</i>                | $\alpha$ -Proteobacteria      |
| 1 | B | <i>Aster</i>                | Firmicutes                    |
| 1 | B | <i>Aurantimonas</i>         | $\alpha$ -Proteobacteria      |
| 1 | B | <i>Bifidobacterium</i>      | Actinobacteria                |
| 1 | B | <i>Caldibacillus</i>        | Firmicutes                    |
| 1 | B | <i>Caldicellulosiruptor</i> | Firmicutes                    |
| 1 | B | <i>Caminibacter</i>         | $\varepsilon$ -Proteobacteria |
| 1 | B | <i>Cellvibrio</i>           | $\gamma$ -Proteobacteria      |
| 1 | B | <i>Chloroflexus</i>         | Chloroflexi                   |
| 1 | B | <i>Chromohalobacter</i>     | $\gamma$ -Proteobacteria      |
| 1 | B | <i>Collinsella</i>          | Actinobacteria                |
| 1 | B | <i>Colwellia</i>            | $\gamma$ -Proteobacteria      |
| 1 | B | <i>Comamonas</i>            | $\beta$ -Proteobacteria       |
| 1 | B | <i>Congregibacter</i>       | $\gamma$ -Proteobacteria      |
| 1 | B | <i>Dehalococcoides</i>      | Chloroflexi                   |
| 1 | B | <i>Delftia</i>              | $\beta$ -Proteobacteria       |
| 1 | B | <i>Desulfotomaculum</i>     | Firmicutes                    |
| 1 | B | <i>Desulfovibrio</i>        | $\delta$ -Proteobacteria      |
| 1 | B | <i>Erwinia</i>              | $\gamma$ -Proteobacteria      |
| 1 | B | <i>Eubacterium</i>          | Firmicutes                    |
| 1 | B | <i>Ewingella</i>            | $\gamma$ -Proteobacteria      |
| 1 | B | <i>Geobacillus</i>          | Firmicutes                    |
| 1 | B | <i>Gloeobacter</i>          | Cyanobacteria                 |
| 1 | B | <i>Gluconobacter</i>        | $\alpha$ -Proteobacteria      |
| 1 | B | <i>Haemophilus</i>          | $\gamma$ -Proteobacteria      |
| 1 | B | <i>Helicobacter</i>         | $\varepsilon$ -Proteobacteria |
| 1 | B | <i>Idiomarina</i>           | $\gamma$ -Proteobacteria      |
| 1 | B | <i>Janthinobacterium</i>    | $\beta$ -Proteobacteria       |
| 1 | B | <i>Lactococcus</i>          | Firmicutes                    |
| 1 | B | <i>Lawsonia</i>             | $\delta$ -Proteobacteria      |
| 1 | B | <i>Leifsonia</i>            | Actinobacteria                |
| 1 | B | <i>Leuconostoc</i>          | Firmicutes                    |

|   |   |                              |                                  |
|---|---|------------------------------|----------------------------------|
| 1 | B | <i>Listonella</i>            | $\gamma$ -Proteobacteria         |
| 1 | B | <i>Magnetospirillum</i>      | $\alpha$ -Proteobacteria         |
| 1 | B | <i>Maricaulis</i>            | $\alpha$ -Proteobacteria         |
| 1 | B | <i>Mesoplasma</i>            | Firmicutes                       |
| 1 | B | <i>Moritella</i>             | $\gamma$ -Proteobacteria         |
| 1 | B | <i>Mycoplasma</i>            | Firmicutes                       |
| 1 | B | <i>Nitrosomonas</i>          | $\beta$ -Proteobacteria          |
| 1 | B | <i>Nitrospira</i>            | $\beta$ -Proteobacteria          |
| 1 | B | <i>Nodularia</i>             | Cyanobacteria                    |
| 1 | B | <i>Oceanicola</i>            | $\alpha$ -Proteobacteria         |
| 1 | B | <i>Oenococcus</i>            | Firmicutes                       |
| 1 | B | <i>Parabacteroides</i>       | Bacteroidetes/Chlorobi group     |
| 1 | B | <i>Paracoccus</i>            | $\alpha$ -Proteobacteria         |
| 1 | B | <i>Parvibaculum</i>          | $\alpha$ -Proteobacteria         |
| 1 | B | <i>Parvularcula</i>          | $\alpha$ -Proteobacteria         |
| 1 | B | <i>Pelobacter</i>            | $\delta$ -Proteobacteria         |
| 1 | B | <i>Pelotomaculum</i>         | Firmicutes                       |
| 1 | B | <i>Petrotoga</i>             | Thermotogae                      |
| 1 | B | <i>Photorhabdus</i>          | $\gamma$ -Proteobacteria         |
| 1 | B | <i>Psychromonas</i>          | $\gamma$ -Proteobacteria         |
| 1 | B | <i>Reinekea</i>              | $\gamma$ -Proteobacteria         |
| 1 | B | <i>Rhodobacter</i>           | $\alpha$ -Proteobacteria         |
| 1 | B | <i>Rhodobacterales</i>       | $\alpha$ -Proteobacteria         |
| 1 | B | <i>Rickettsia</i>            | $\alpha$ -Proteobacteria         |
| 1 | B | <i>Rickettsiella</i>         | $\alpha$ -Proteobacteria         |
| 1 | B | <i>Salinivibrio</i>          | $\gamma$ -Proteobacteria         |
| 1 | B | <i>Salmonella</i>            | $\gamma$ -Proteobacteria         |
| 1 | B | <i>Sodalis</i>               | $\gamma$ -Proteobacteria         |
| 1 | B | <i>Sphingopyxis</i>          | $\alpha$ -Proteobacteria         |
| 1 | B | <i>Staphylococcus</i>        | Firmicutes                       |
| 1 | B | <i>Synechocystis</i>         | Cyanobacteria                    |
| 1 | B | <i>Syntrophus</i>            | $\delta$ -Proteobacteria         |
| 1 | B | <i>Thermoanaerobacter</i>    | Firmicutes                       |
| 1 | B | <i>Thermoanaerobacterium</i> | Firmicutes                       |
| 1 | B | <i>Thermomonospora</i>       | Actinobacteria                   |
| 1 | B | <i>Thiobacillus</i>          | $\beta$ -Proteobacteria          |
| 1 | B | <i>Treponema</i>             | Spirochaetes                     |
| 1 | B | <i>Wolinella</i>             | $\epsilon$ -Proteobacteria       |
| 1 | B | <i>Zymomonas</i>             | $\alpha$ -Proteobacteria         |
| 1 | E | <i>Aedes</i>                 | Animals (Opisthokonta)           |
| 1 | E | <i>Anopheles</i>             | Animals (Opisthokonta)           |
| 1 | E | <i>Antonospora</i>           | Fungi (Opisthokonta)             |
| 1 | E | <i>Bos</i>                   | Animals (Opisthokonta)           |
| 1 | E | <i>Canis</i>                 | Animals (Opisthokonta)           |
| 1 | E | <i>Cyanophora</i>            | Glaucophyta (Archaeplastida)     |
| 1 | E | <i>Equus</i>                 | Animals (Opisthokonta)           |
| 1 | E | <i>Gallus</i>                | Animals (Opisthokonta)           |
| 1 | E | <i>Giardia</i>               | Diplomonads (Excavata)           |
| 1 | E | <i>Glycine</i>               | Land plants (Archaeplastida)     |
| 1 | E | <i>Homo</i>                  | Animals (Opisthokonta)           |
| 1 | E | <i>Isochrysis</i>            | Haptophytes (Chromalveolata)     |
| 1 | E | <i>Karlodinium</i>           | Dinoflagellates (Chromalveolata) |
| 1 | E | <i>Macaca</i>                | Animals (Opisthokonta)           |
| 1 | E | <i>Micromonas</i>            | Green algae (Archaeplastida)     |
| 1 | E | <i>Monodelphis</i>           | Animals (Opisthokonta)           |

|   |   |                           |                              |
|---|---|---------------------------|------------------------------|
| 1 | E | <i>Mortierella</i>        | Fungi (Opisthokonta)         |
| 1 | E | <i>Mythimna</i>           | Animals (Opisthokonta)       |
| 1 | E | <i>Neocallimastix</i>     | Fungi (Opisthokonta)         |
| 1 | E | <i>Ornithorhynchus</i>    | Animals (Opisthokonta)       |
| 1 | E | <i>Oxytricha</i>          | Ciliophora (Chromalveolata)  |
| 1 | E | <i>Polysphondylium</i>    | Eumycetozoa (Amoebozoa)      |
| 1 | E | <i>Saccharum</i>          | Land plants (Archaeplastida) |
| 1 | E | <i>Strongylocentrotus</i> | Animals (Opisthokonta)       |
| 1 | E | <i>Tribolium</i>          | Animals (Opisthokonta)       |
| 1 | E | <i>Ustilago</i>           | Fungi (Opisthokonta)         |
| 1 | E | <i>Xenopus</i>            | Animals (Opisthokonta)       |
| 1 | E | <i>Yarrowia</i>           | Fungi (Opisthokonta)         |
| 1 | V | <i>Agrotis</i>            | Baculoviridae                |
| 1 | V | <i>Anomala</i>            | Poxviridae                   |
| 1 | V | <i>Anticarsia</i>         | Baculoviridae                |
| 1 | V | <i>Autographa</i>         | Baculoviridae                |
| 1 | V | <i>Bombyx</i>             | Baculoviridae                |
| 1 | V | <i>Chlorella</i>          | Phycodnaviridae              |
| 1 | V | <i>Choristoneura</i>      | Poxviridae                   |
| 1 | V | <i>Chrysodeixis</i>       | Baculoviridae                |
| 1 | V | <i>Clanis</i>             | Baculoviridae                |
| 1 | V | <i>Cydia</i>              | Baculoviridae                |
| 1 | V | <i>Ecotropis</i>          | Baculoviridae                |
| 1 | V | <i>Emiliana</i>           | Phycodnaviridae              |
| 1 | V | <i>Epiphyas</i>           | Baculoviridae                |
| 1 | V | <i>Erwinia</i>            | Caudovirales                 |
| 1 | V | <i>Helicoverpa</i>        | Baculoviridae                |
| 1 | V | <i>Hyphantria</i>         | Baculoviridae                |
| 1 | V | <i>Leucania</i>           | Baculoviridae                |
| 1 | V | <i>Lymantria</i>          | Baculoviridae                |
| 1 | V | <i>Mamestra</i>           | Baculoviridae                |
| 1 | V | <i>Mannheimia</i>         | Caudovirales                 |
| 1 | V | <i>Maruca</i>             | Baculoviridae                |
| 1 | V | <i>Orgyia</i>             | Baculoviridae                |
| 1 | V | <i>Rhodothermus</i>       | Caudovirales                 |
| 1 | V | <i>Trichoplusia</i>       | Ascoviridae                  |
| 1 | V | <i>Xestia</i>             | Baculoviridae                |

---

<sup>a</sup>) A: Archaea; B: bacteria; E: Eukaryota; V: Viruses.

# Evolution of patchily distributed proteins shared between eukaryotes and prokaryotes: *Dictyostelium* as a case study.

Jan O. Andersson

## Supplementary Table 2

The properties of the 49 patchily distributed genes compared to the 9952 *D. discoideum* genes coding for proteins more than 200 amino acids in length.

| Property                     | 49 selected genes | All genes |
|------------------------------|-------------------|-----------|
| Average length (aa)          | 451               | 669       |
| Median length (aa)           | 424               | 516       |
| Introns/gene                 | 1,41              | 1,41      |
| Fraction of intronless genes | 36,7%             | 29,5%     |
| Average G+C content          | 28,5%             | 27,6%     |
| Median G+C content           | 28,4%             | 27,4%     |
| Average GC3s content         | 10,9%             | 12,4%     |
| Median GC3s content          | 10,6%             | 11,0%     |
